# Supplementary material for: Design and synthesis of benzyl aminocoumarin and its anti-Alzheimer's activity
Source: Royal Society of Chemistry journal article supplement (doi:10.1039/d1nj02950a), 2021-01-01
Supplement: d1nj02950a1.pdf [file d1nj02950a1.pdf]

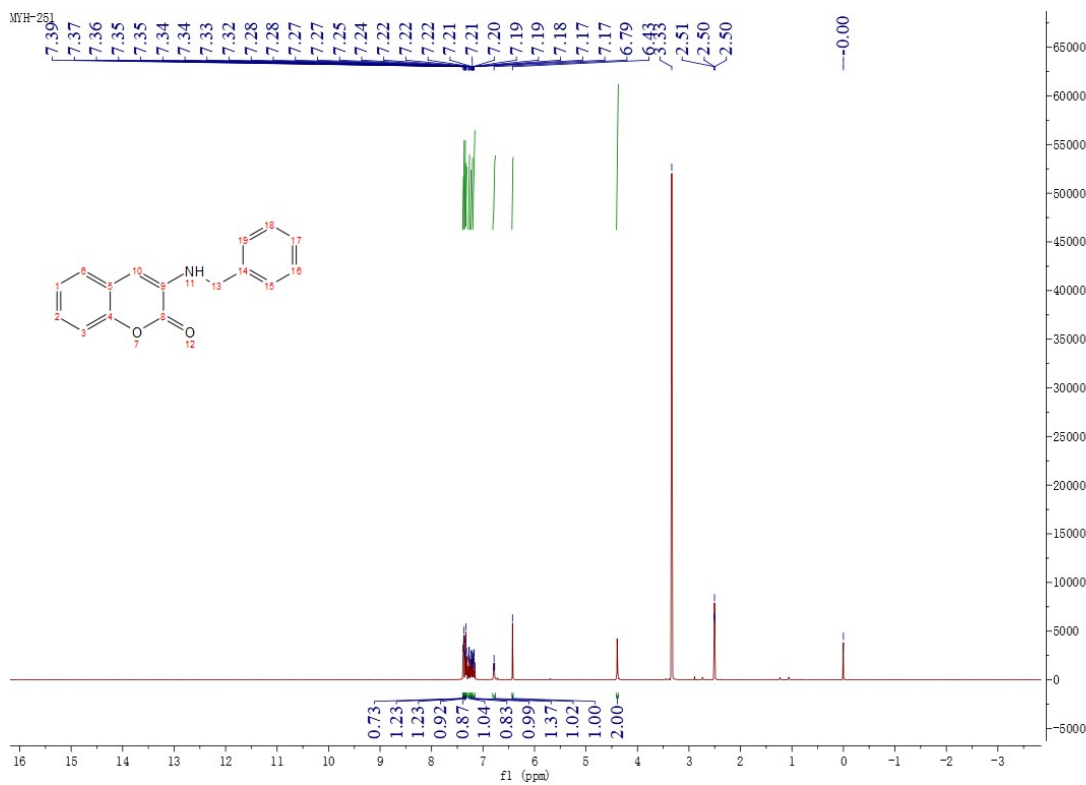

Figure 1 <sup>1</sup>H NMR Spectrum of Compound M1

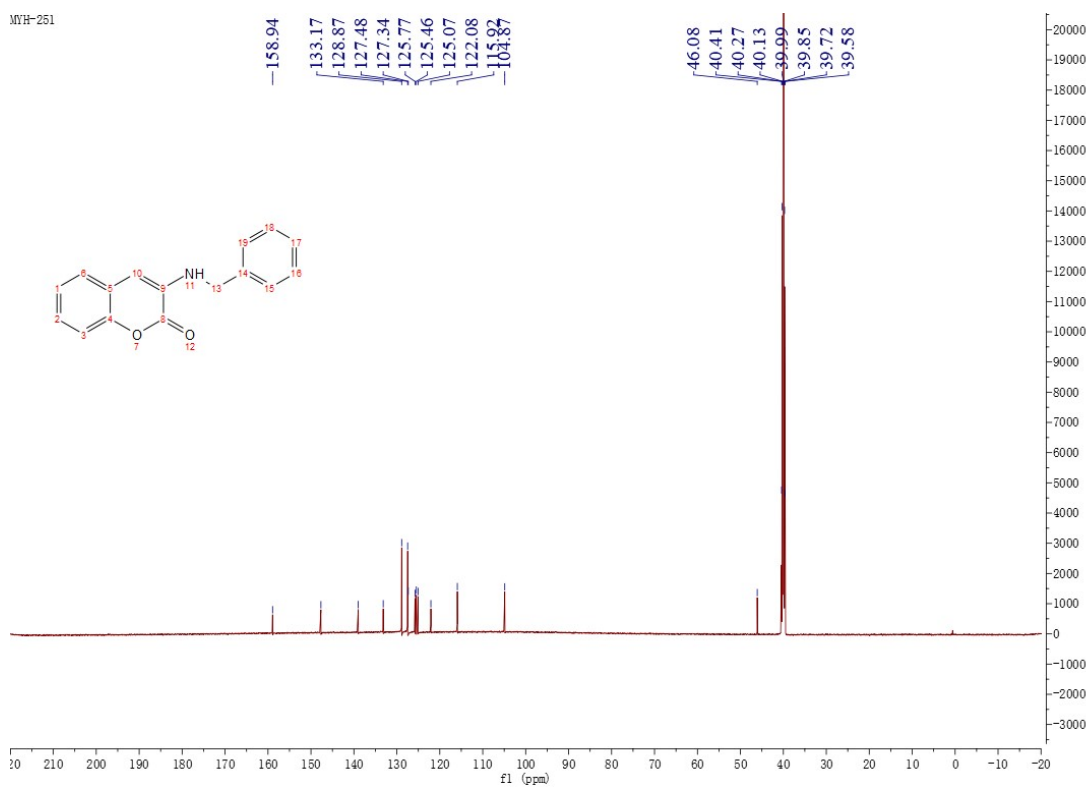

Figure 2 <sup>13</sup>C NMR Spectrum of Compound M1

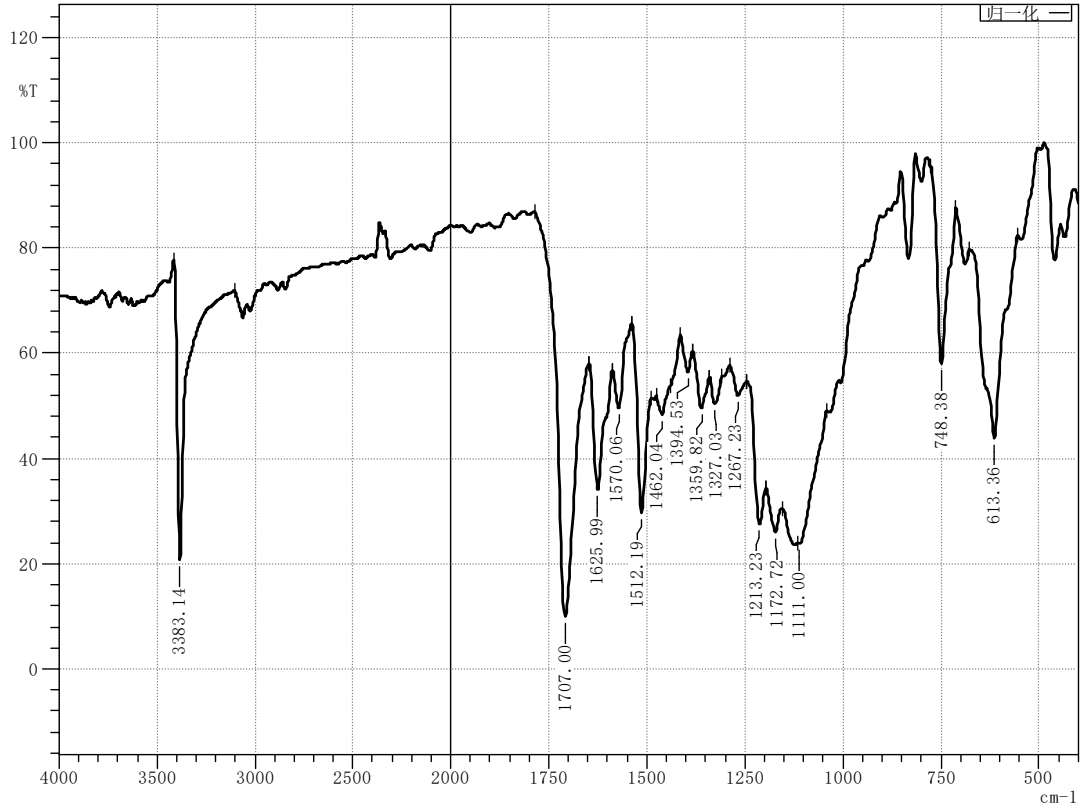

Figure 3 Infrared spectrum of compound M1

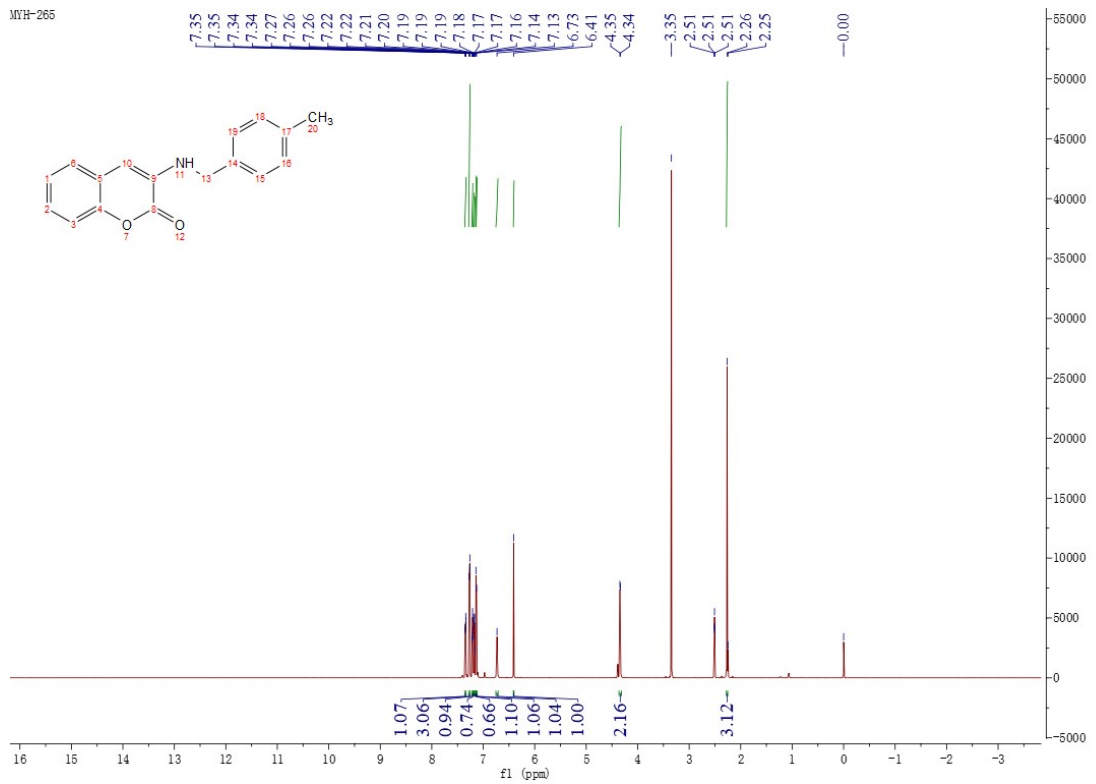

Figure 4 <sup>1</sup>H NMR Spectrum of Compound M2

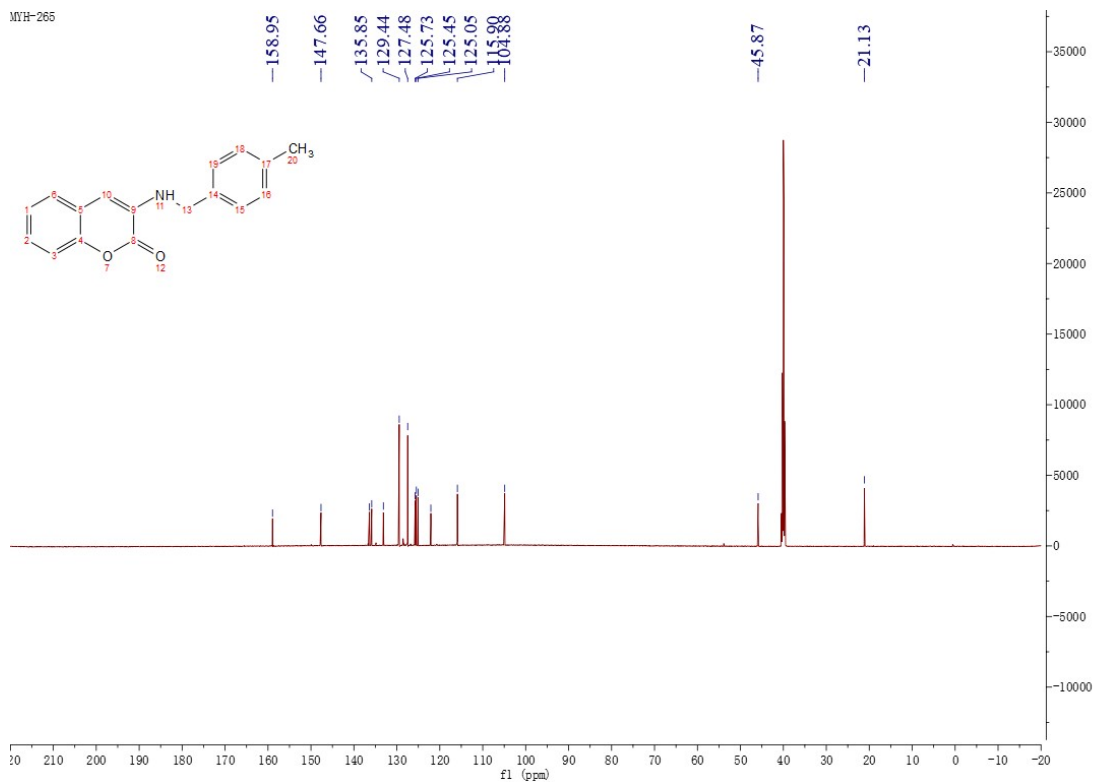

Figure 5 <sup>13</sup>CNMR Spectrum of Compound M2

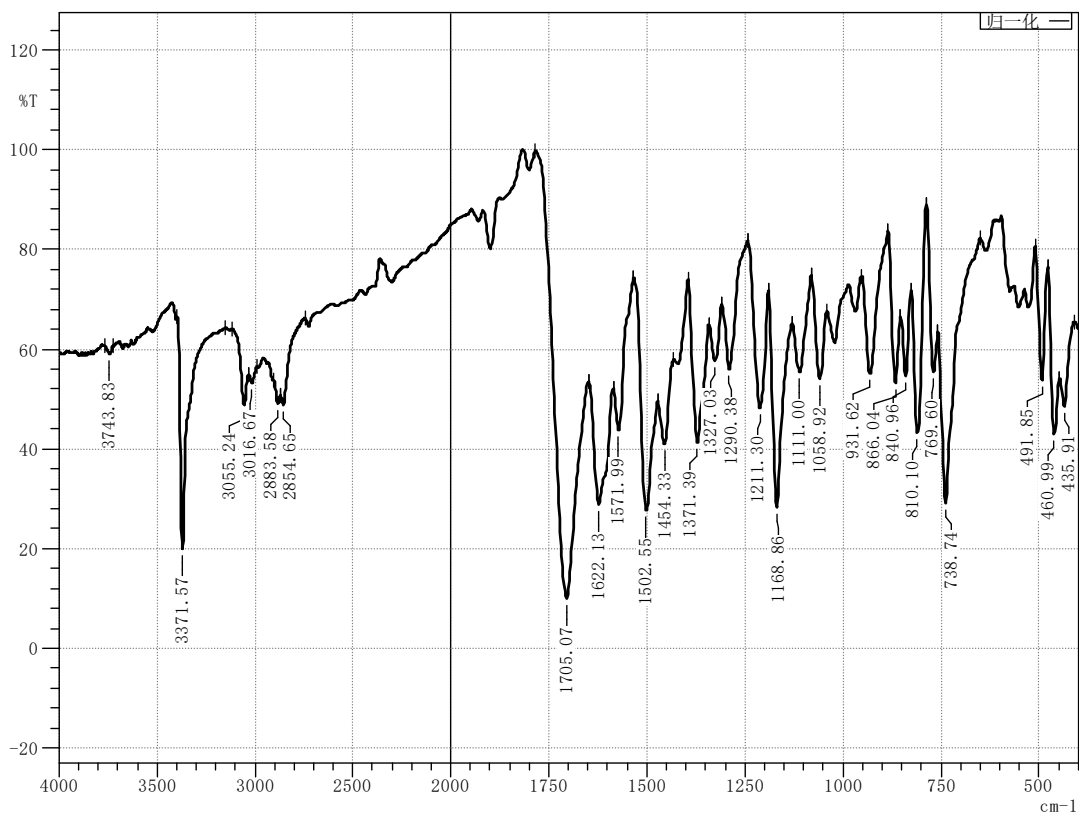

Figure 6 Infrared spectrum of compound M2

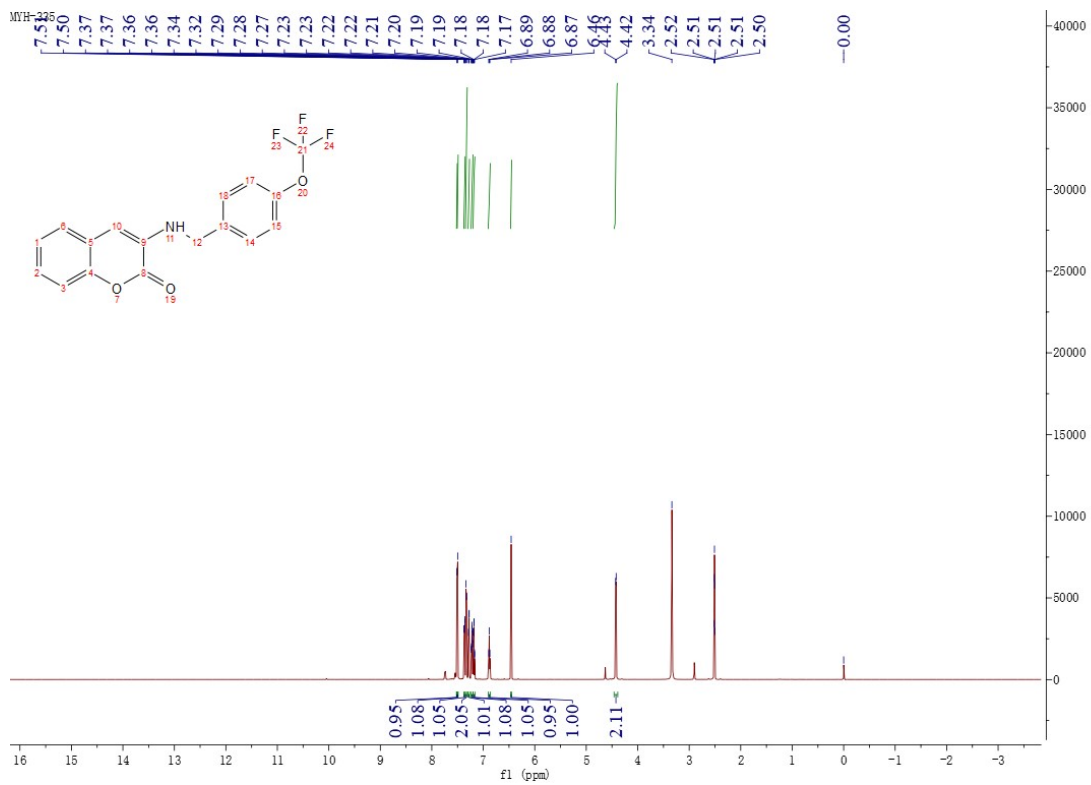

Figure 7 <sup>1</sup>H NMR Spectrum of Compound M3

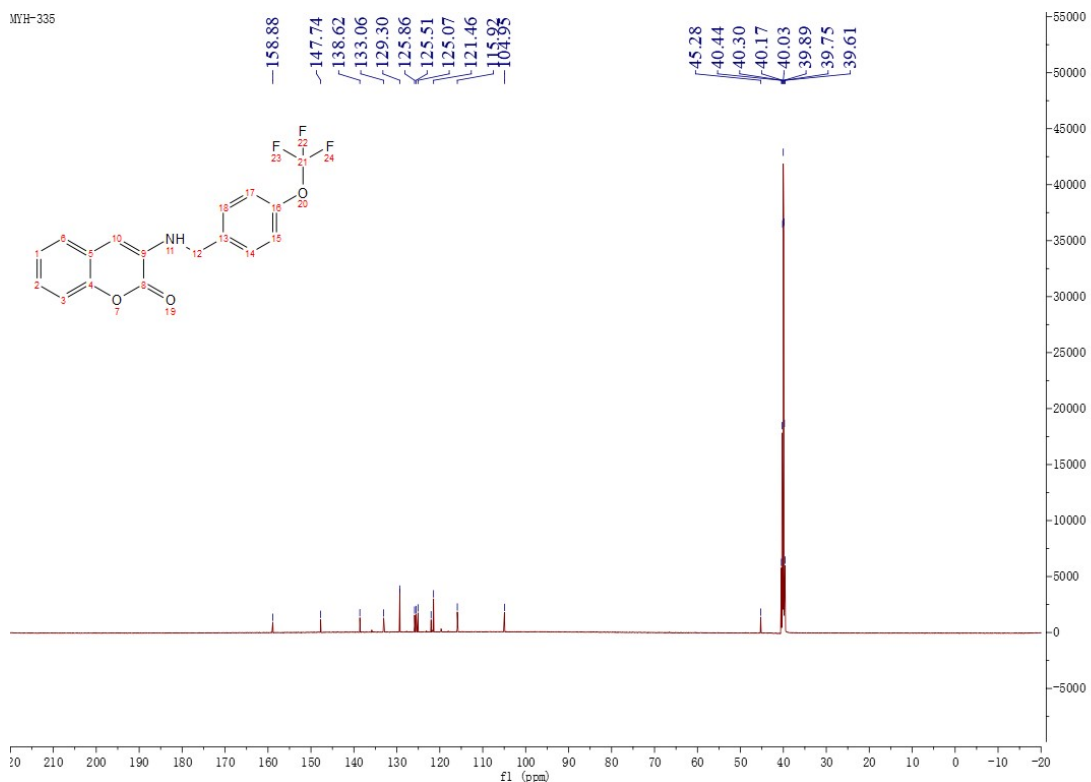

Figure 8 <sup>13</sup>C NMR Spectrum of Compound M3

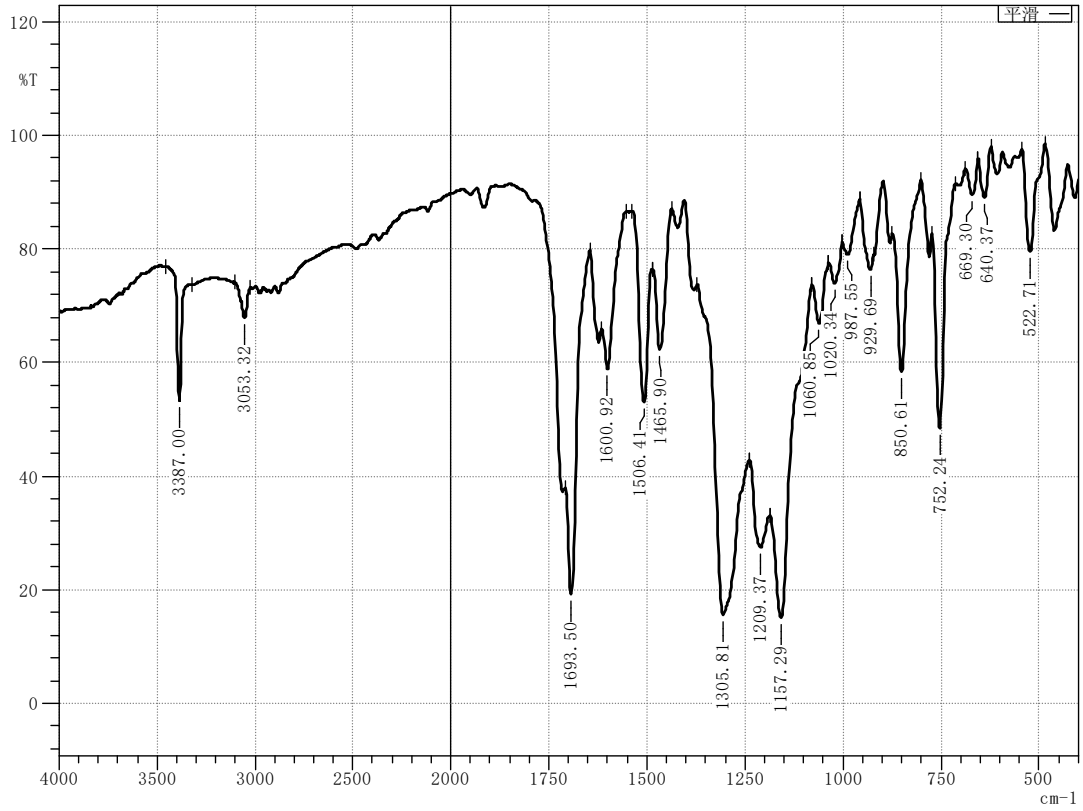

Figure 9 Infrared spectrum of compound M3

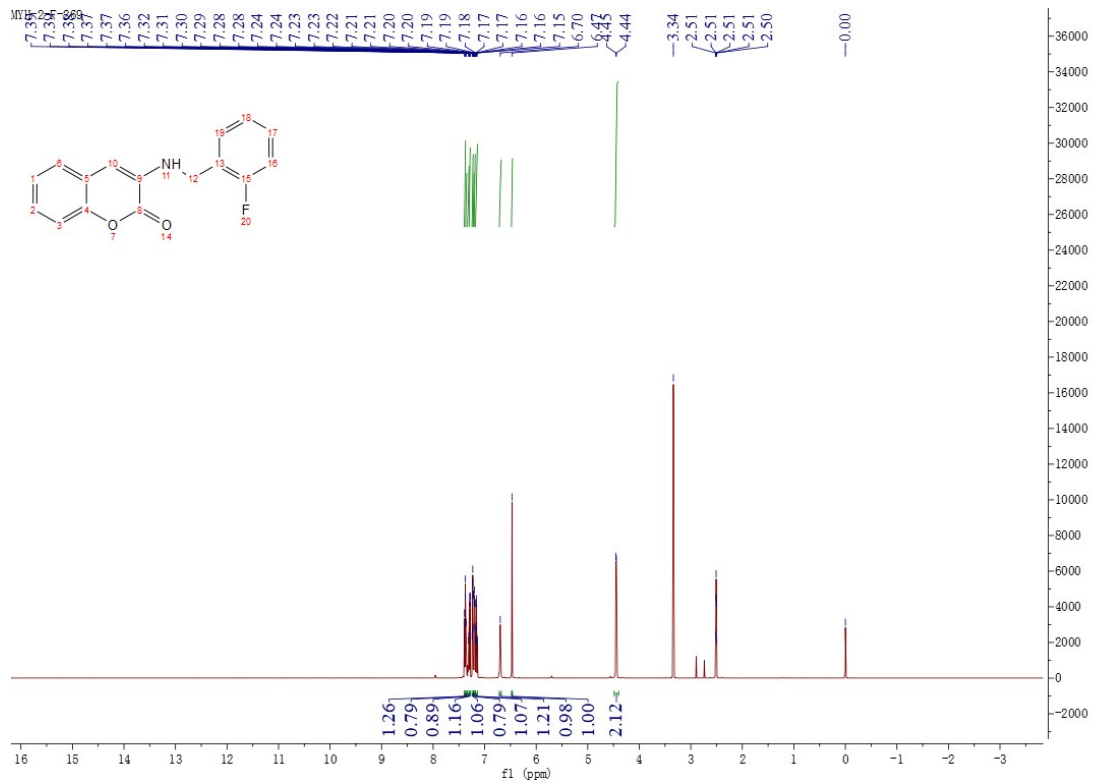

Figure 10 <sup>1</sup>H NMR Spectrum of Compound M4

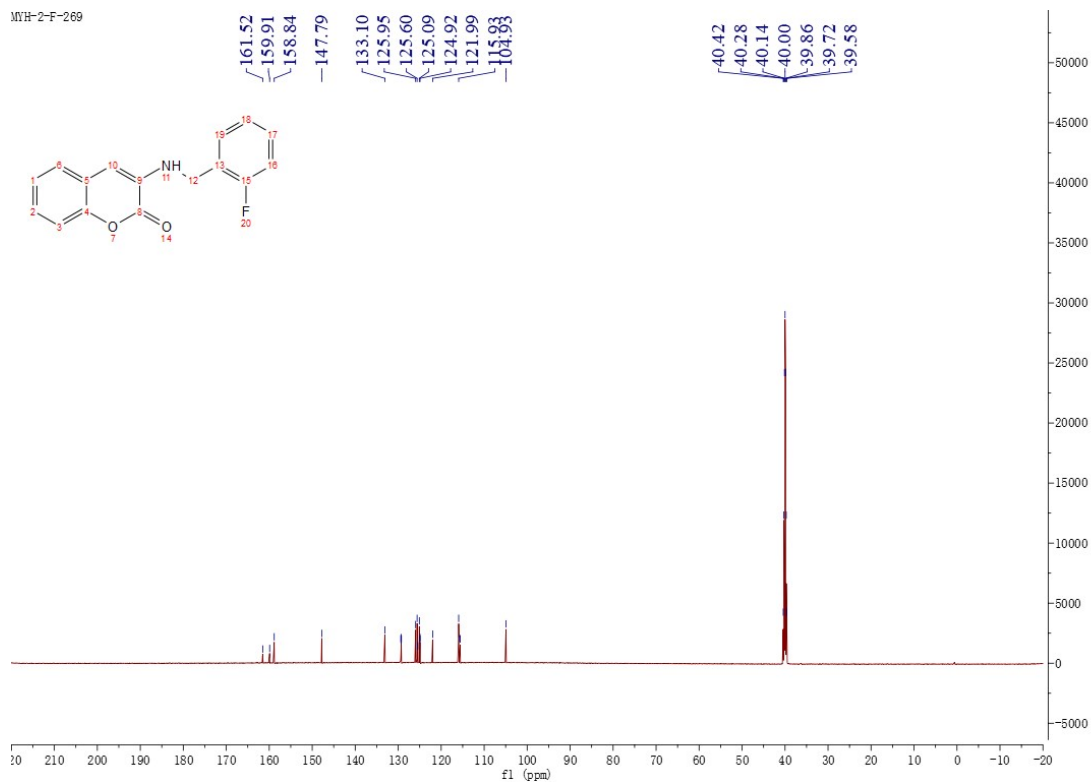

Figure 11  $^{13}\text{C}$ NMR Spectrum of Compound M4

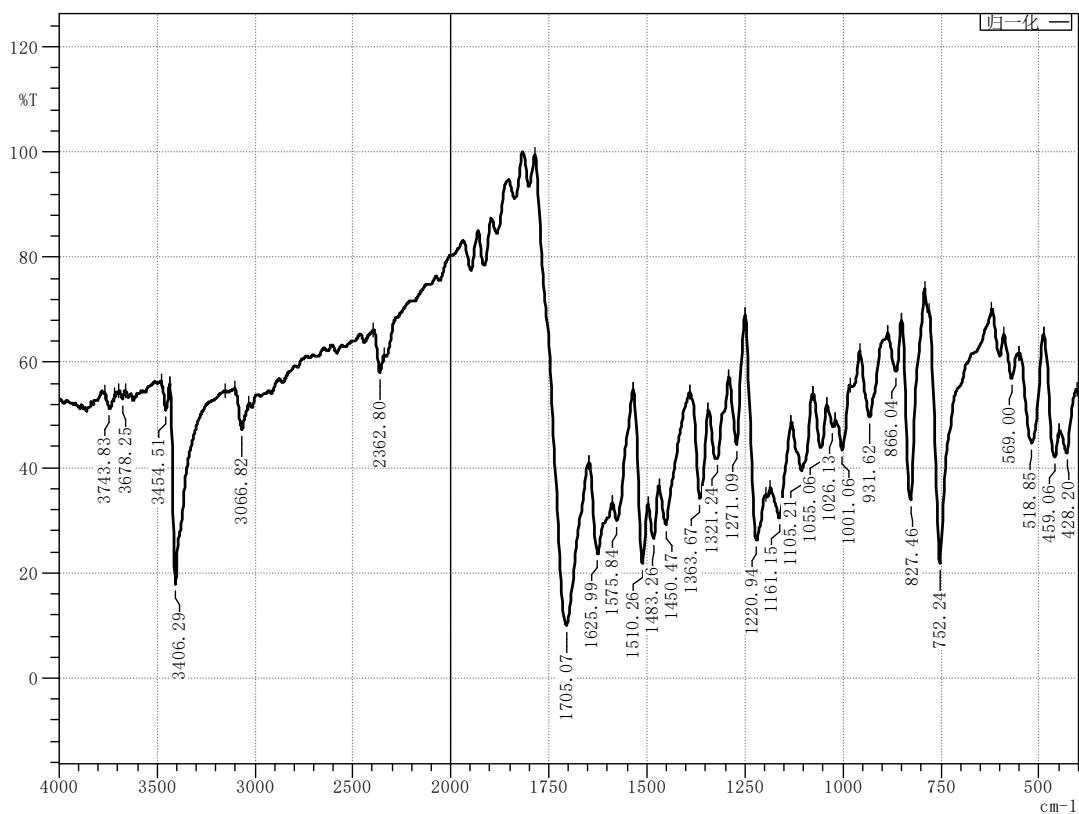

Figure 12 Infrared spectrum of compound M4



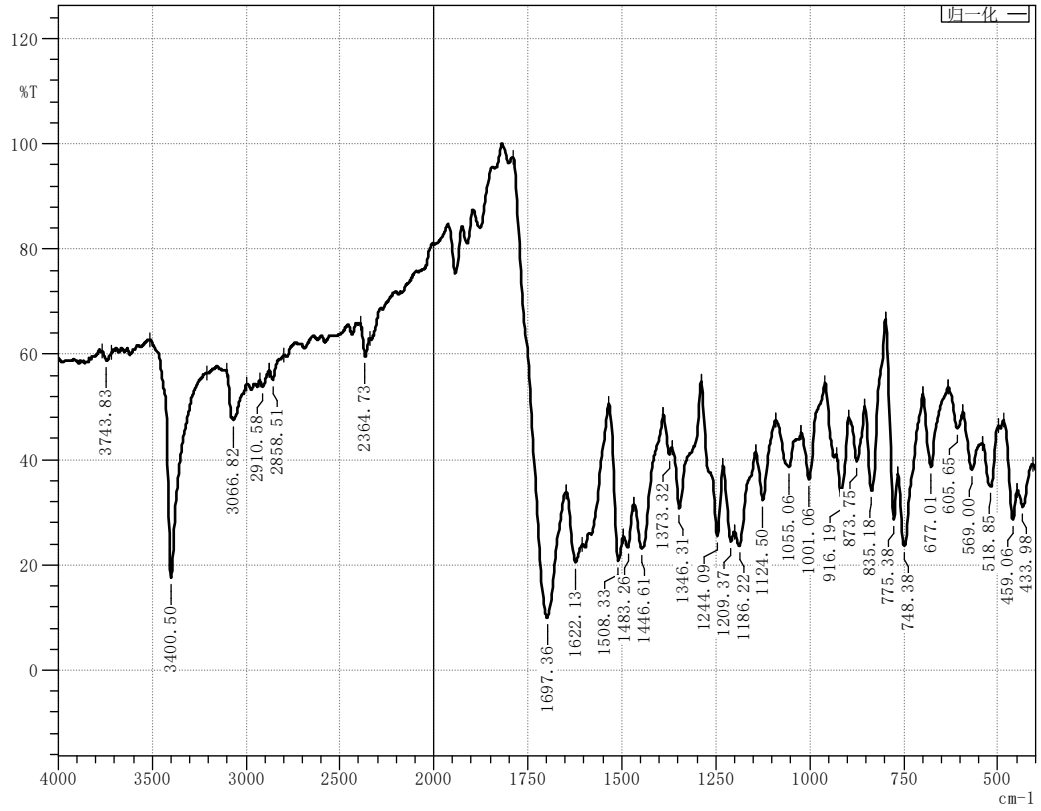

Figure 15 Infrared spectrum of compound M5

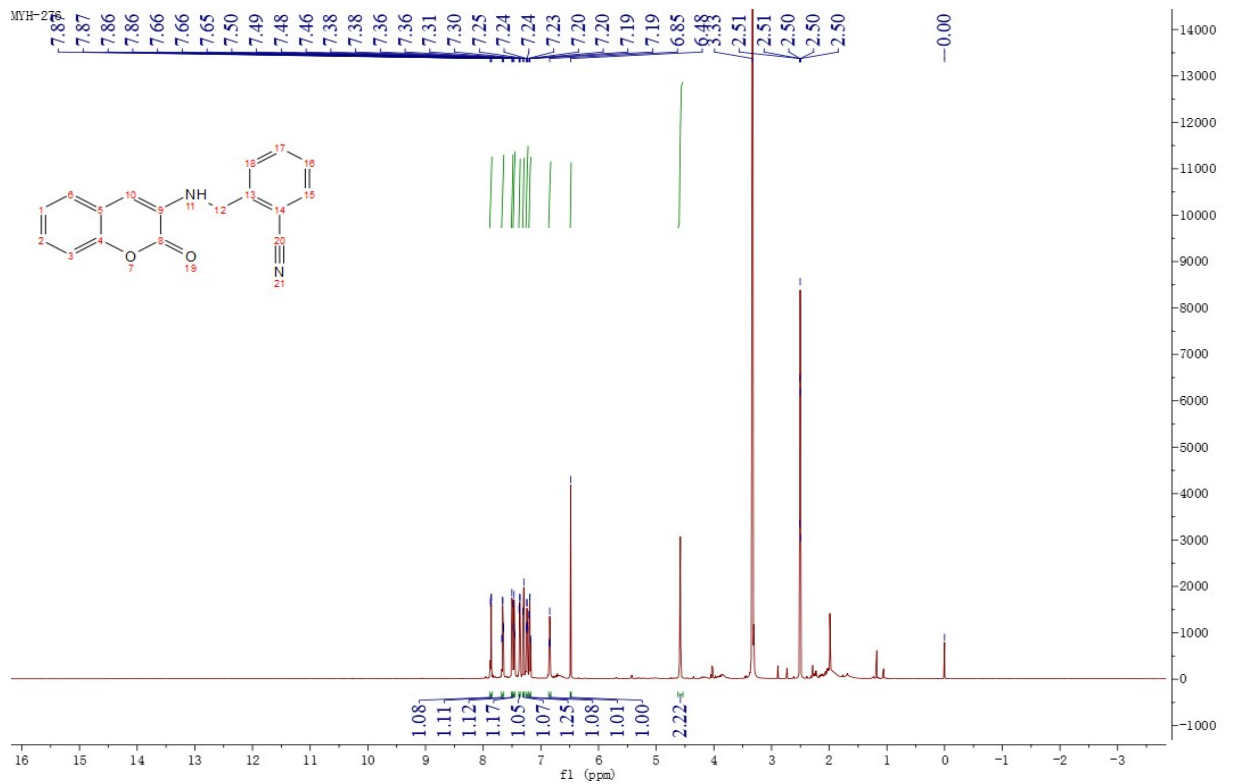

Figure 16 <sup>1</sup>H NMR Spectrum of Compound M6



M17-276

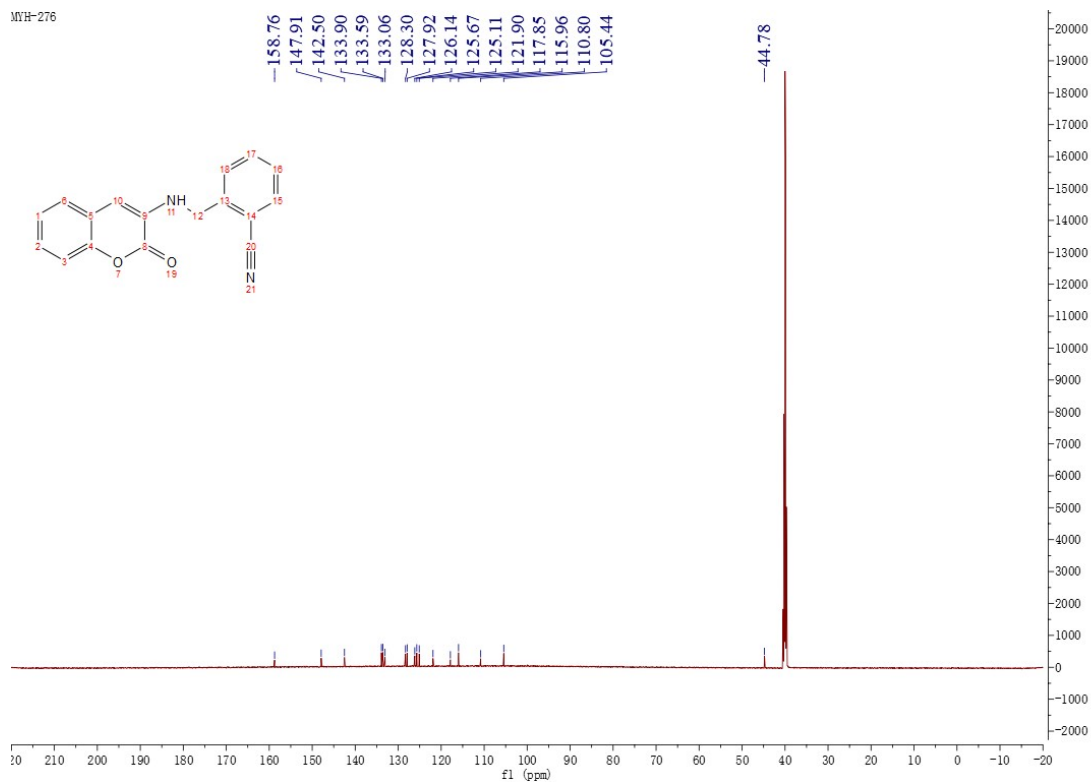

Figure 17 <sup>13</sup>C NMR Spectrum of Compound M17

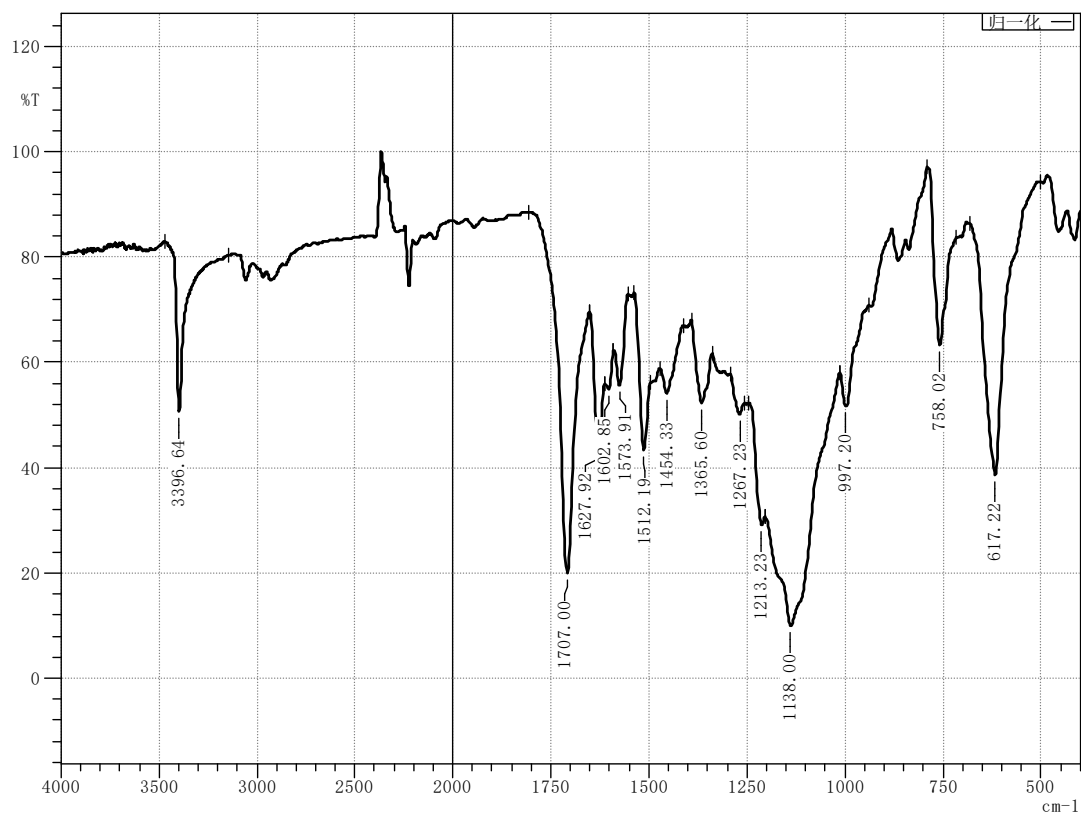

Figure 18 Infrared spectrum of compound M6

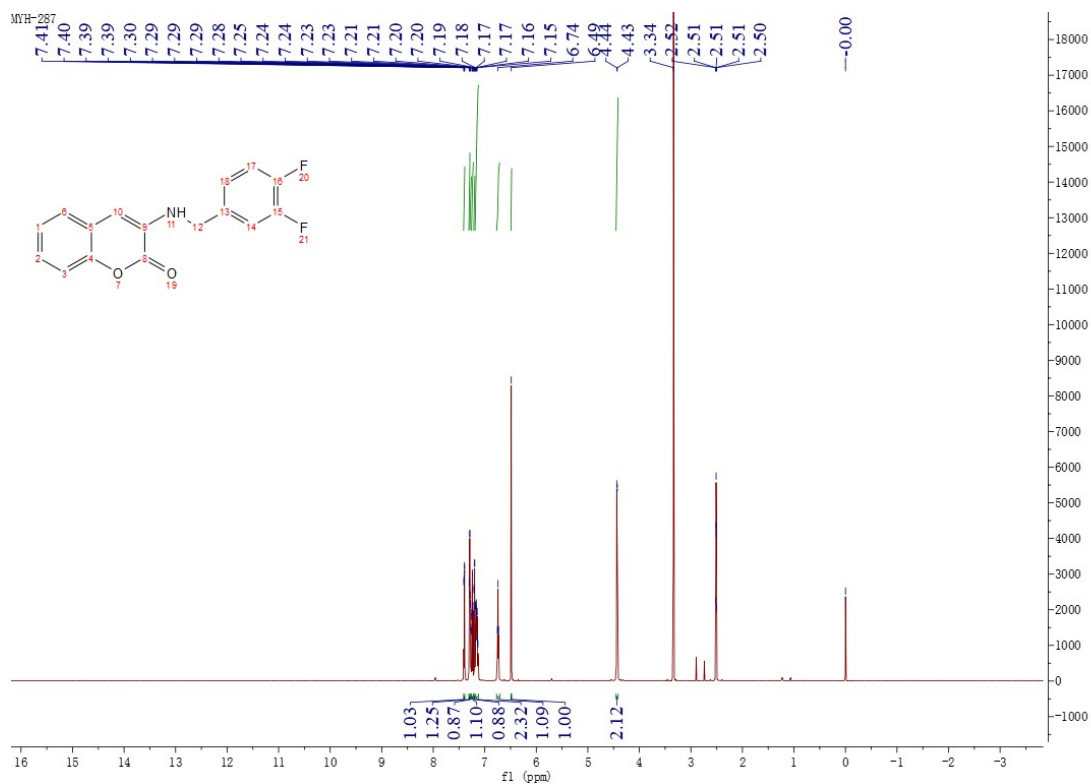

Figure 19  $^1\text{H NMR}$  Spectrum of Compound M7

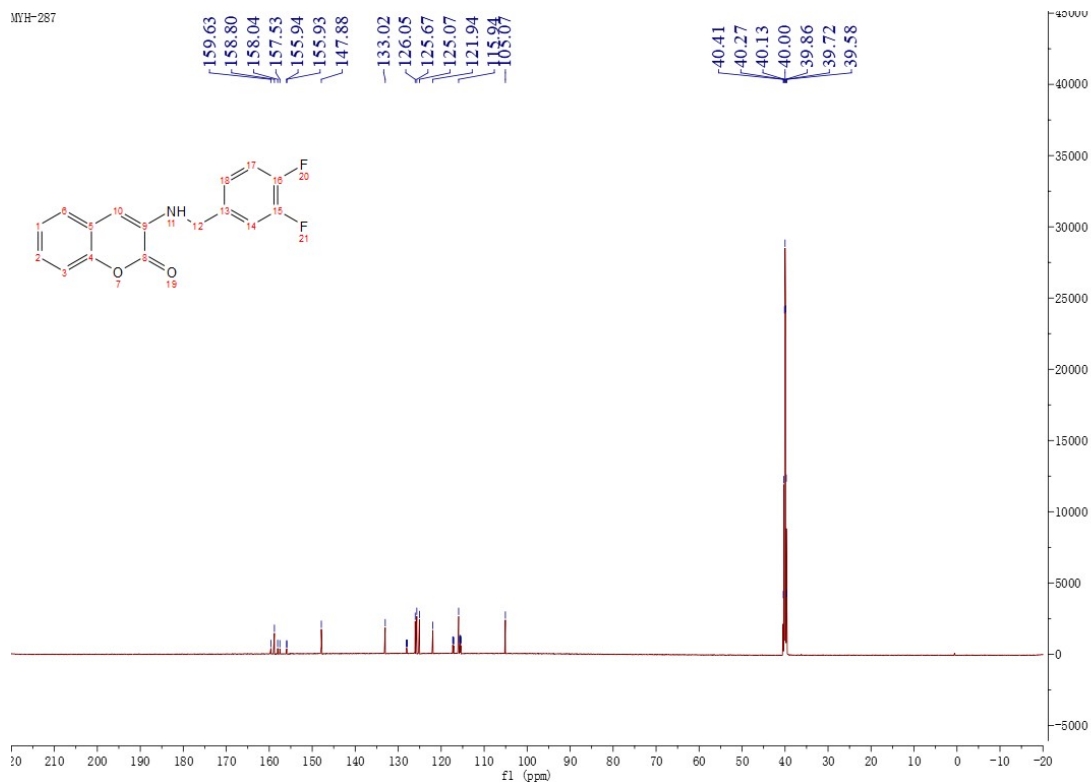

Figure 20  $^{13}\text{C NMR}$  Spectrum of Compound M7

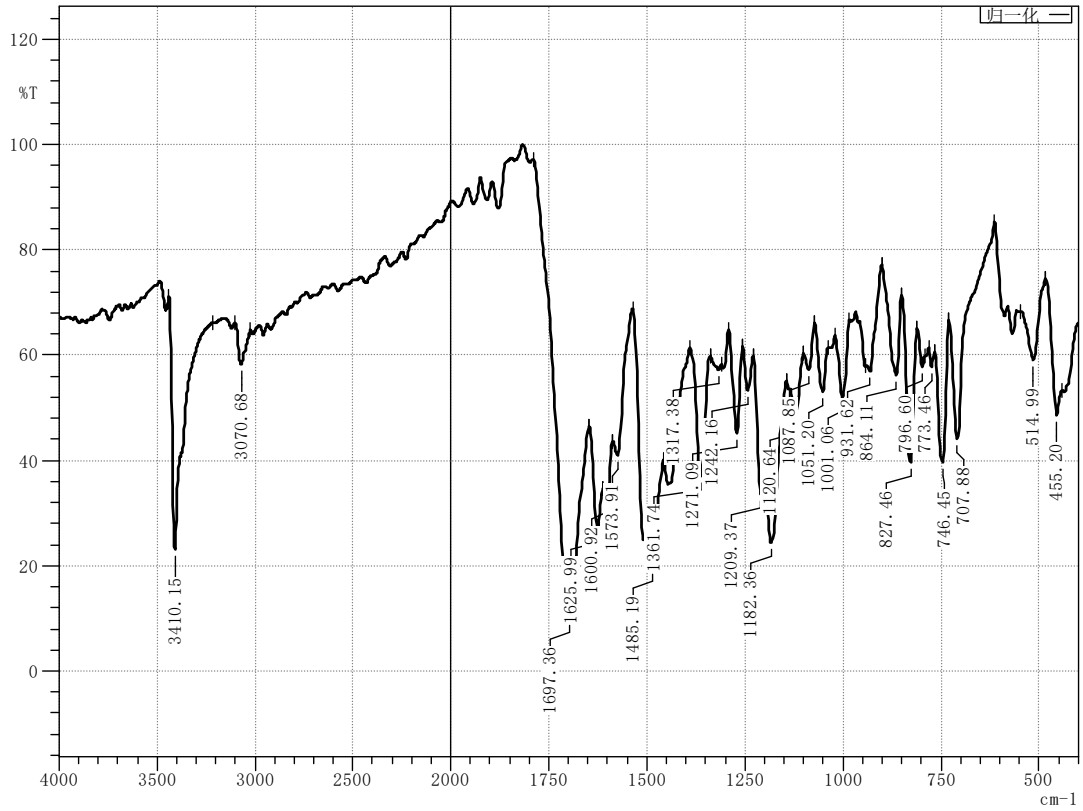

Figure 21 Infrared spectrum of compound M7

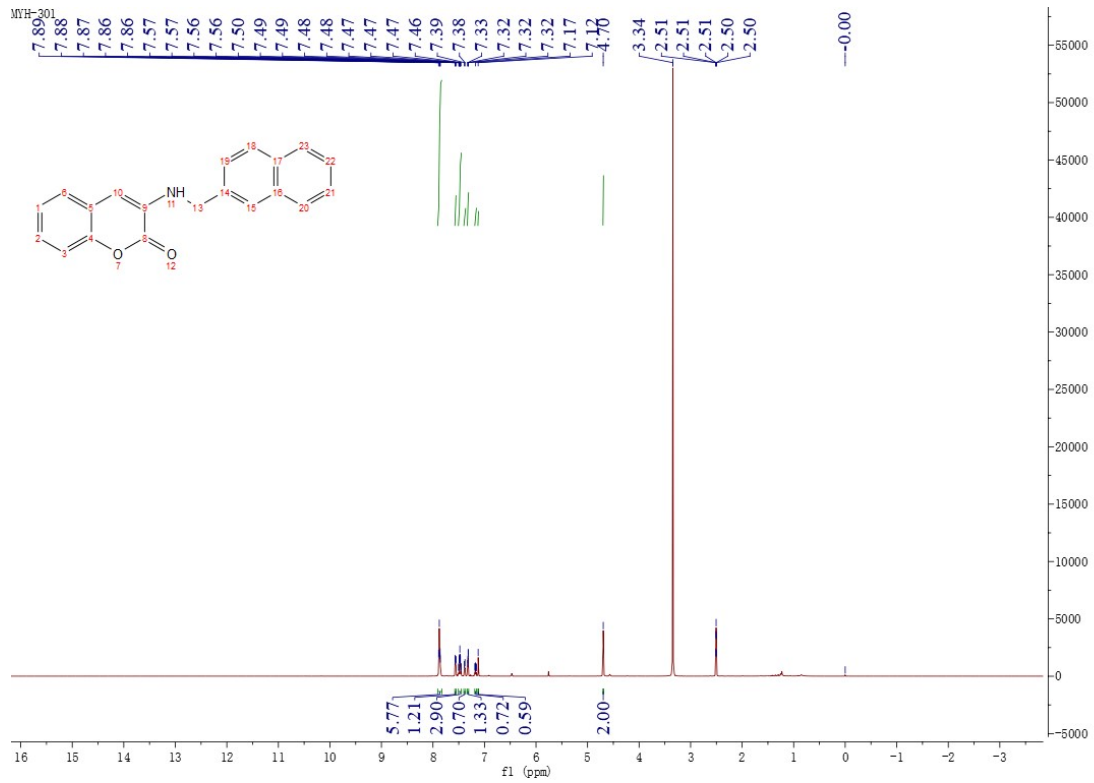

Figure 22 <sup>1</sup>H NMR Spectrum of Compound M8

MH-301

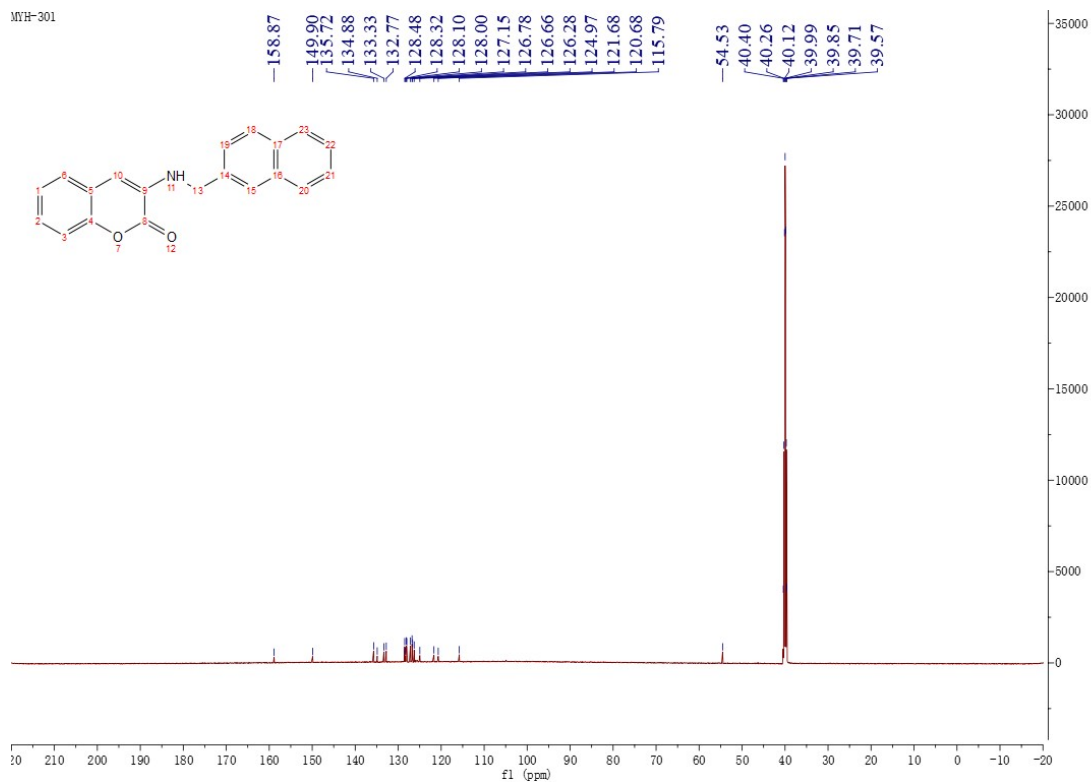

Figure 23 <sup>13</sup>C NMR Spectrum of Compound M8

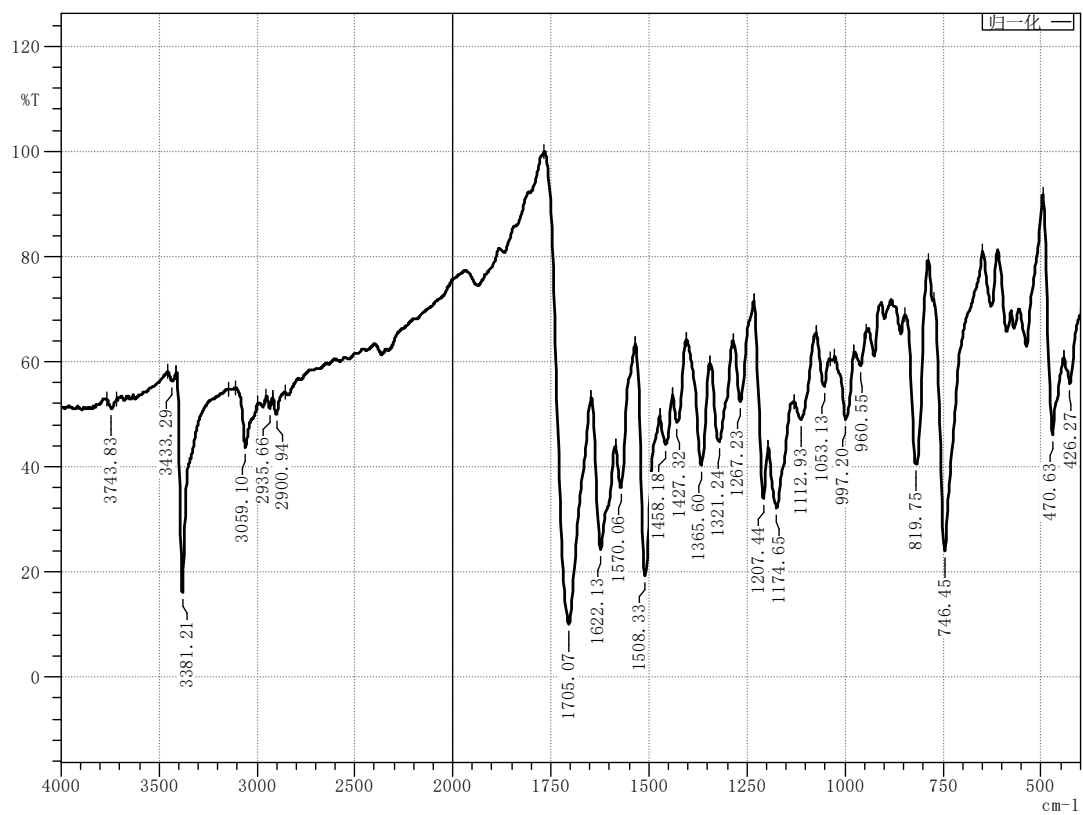

Figure 24 Infrared spectrum of compound M8

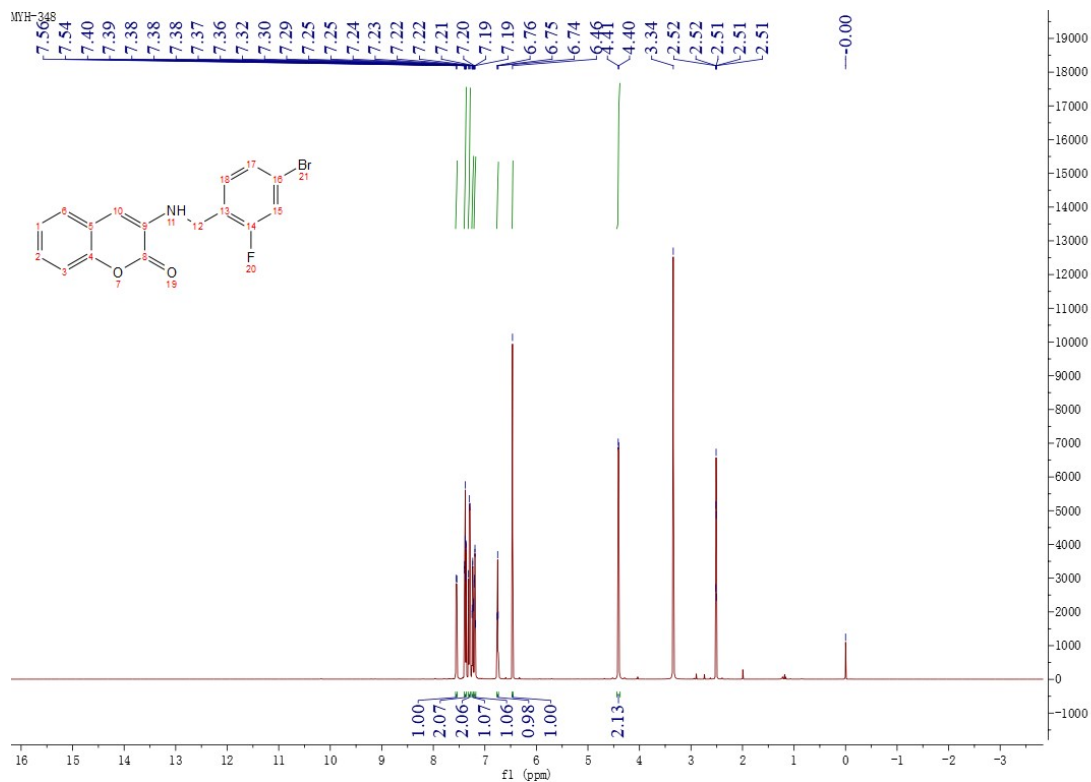

Figure 25  $^1\text{H NMR}$  Spectrum of Compound M9

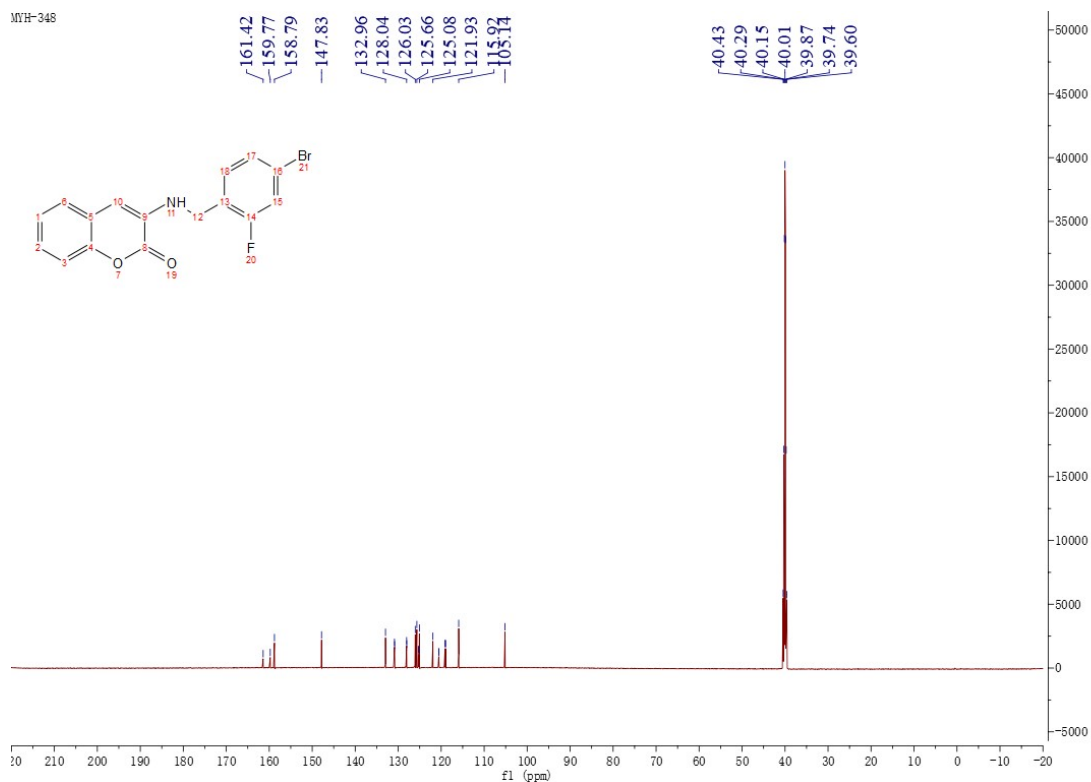

Figure 26  $^{13}\text{C NMR}$  Spectrum of Compound M9

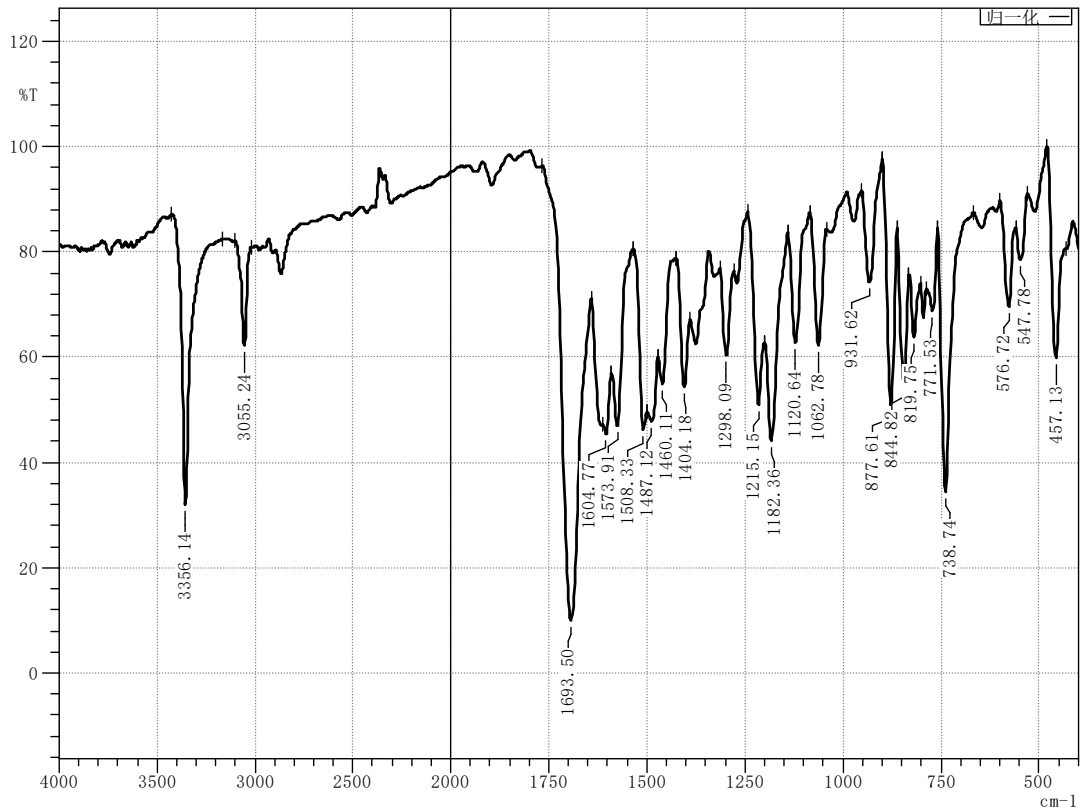

Figure 27 Infrared spectrum of compound M9

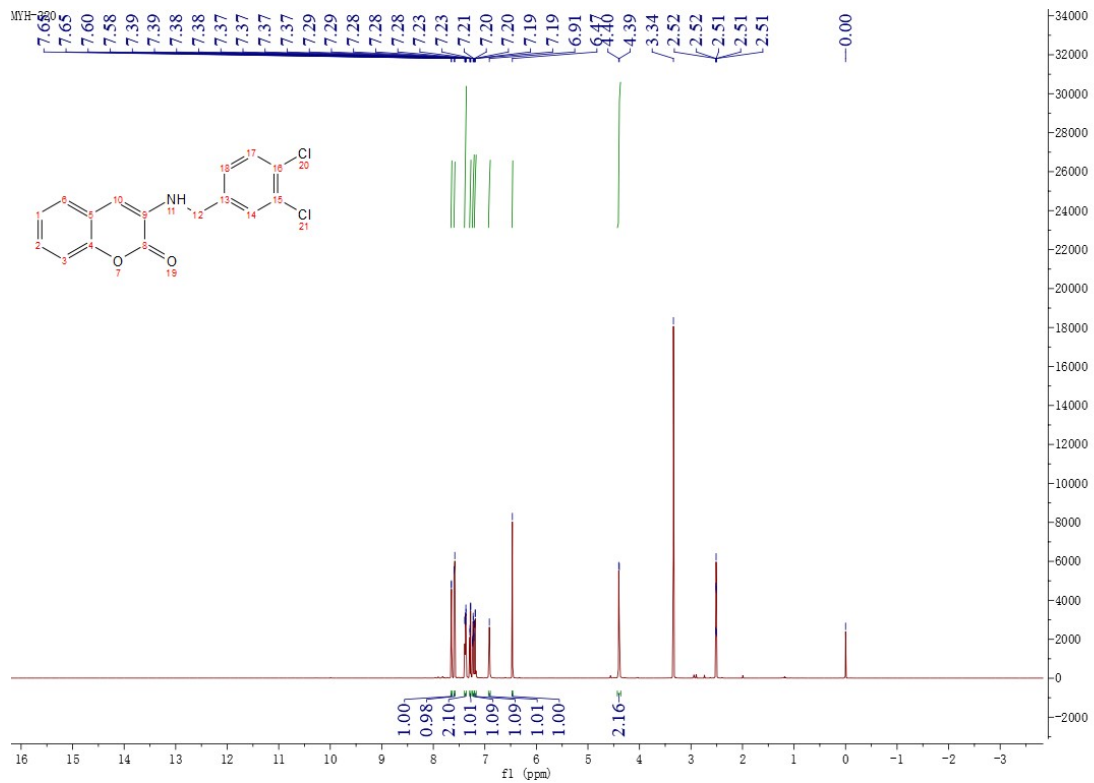

Figure 28 <sup>1</sup>H NMR Spectrum of Compound M10

MH-320

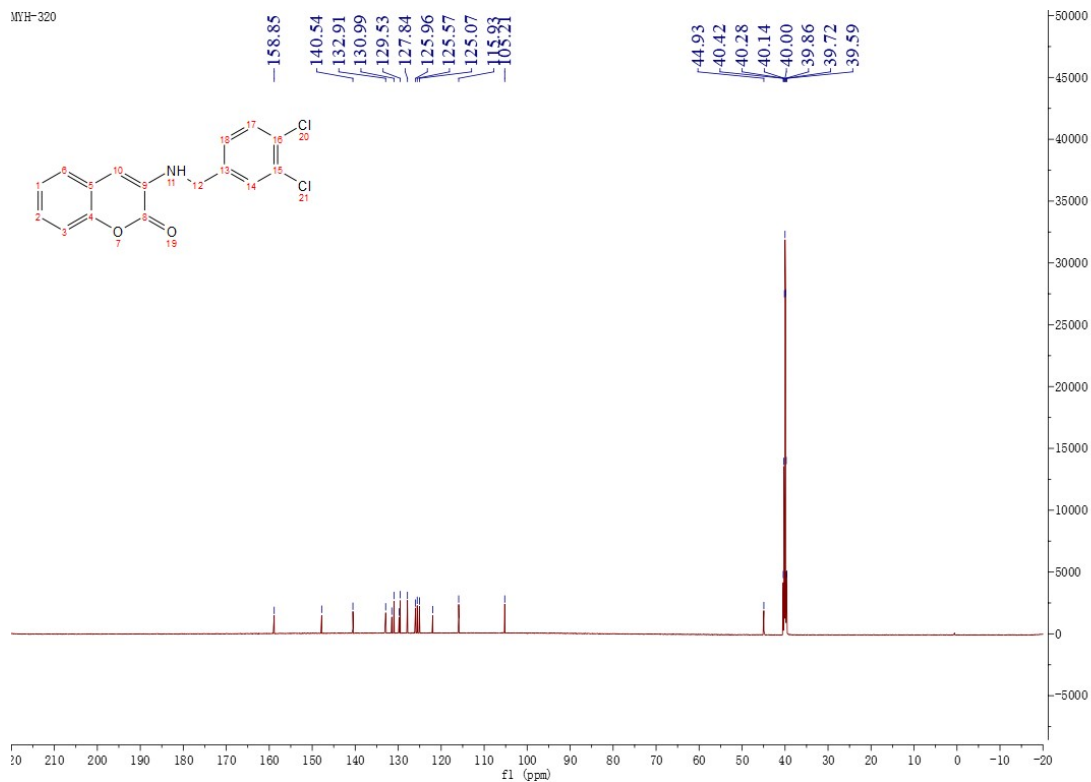

Figure 29 <sup>13</sup>CNMR Spectrum of Compound M10

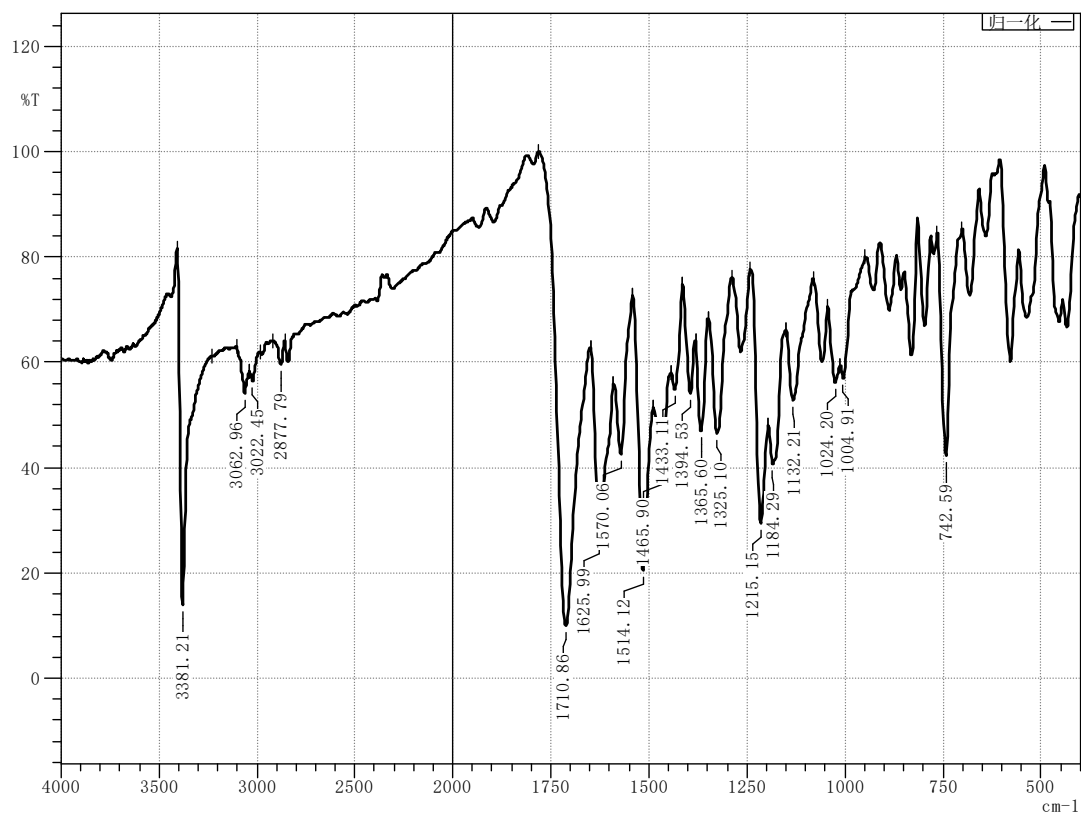

Figure 30 Infrared spectrum of compound M10

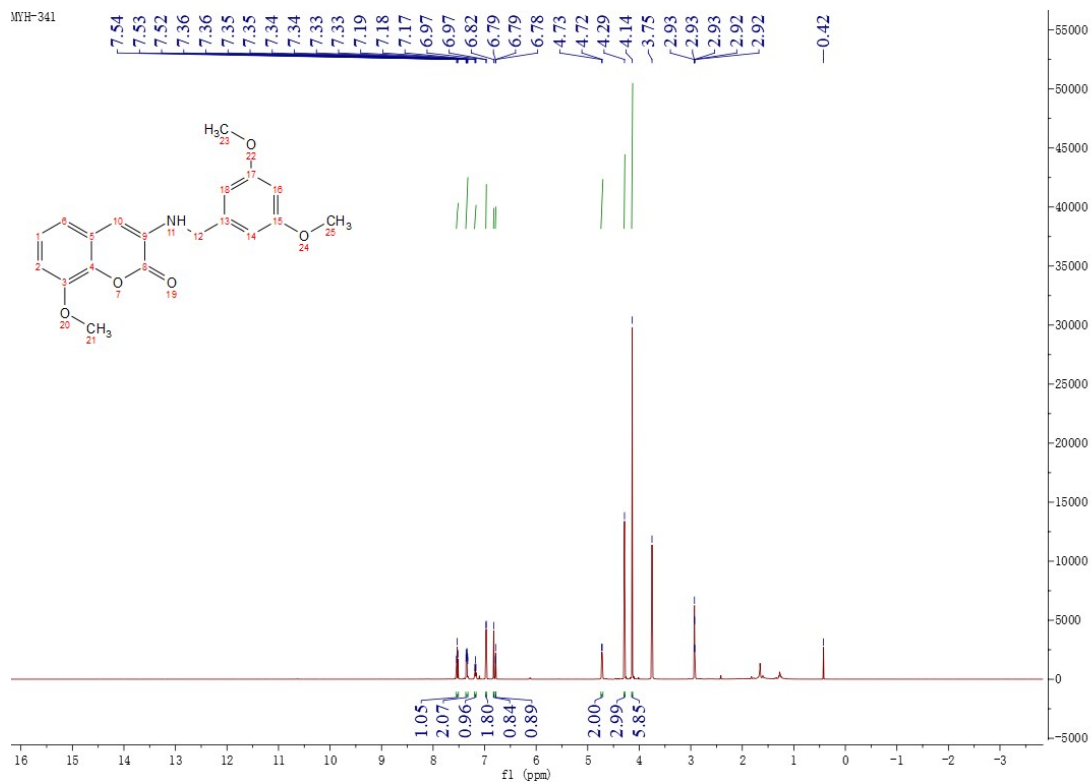

Figure 31  $^1\text{H}$ NMR Spectrum of Compound M11

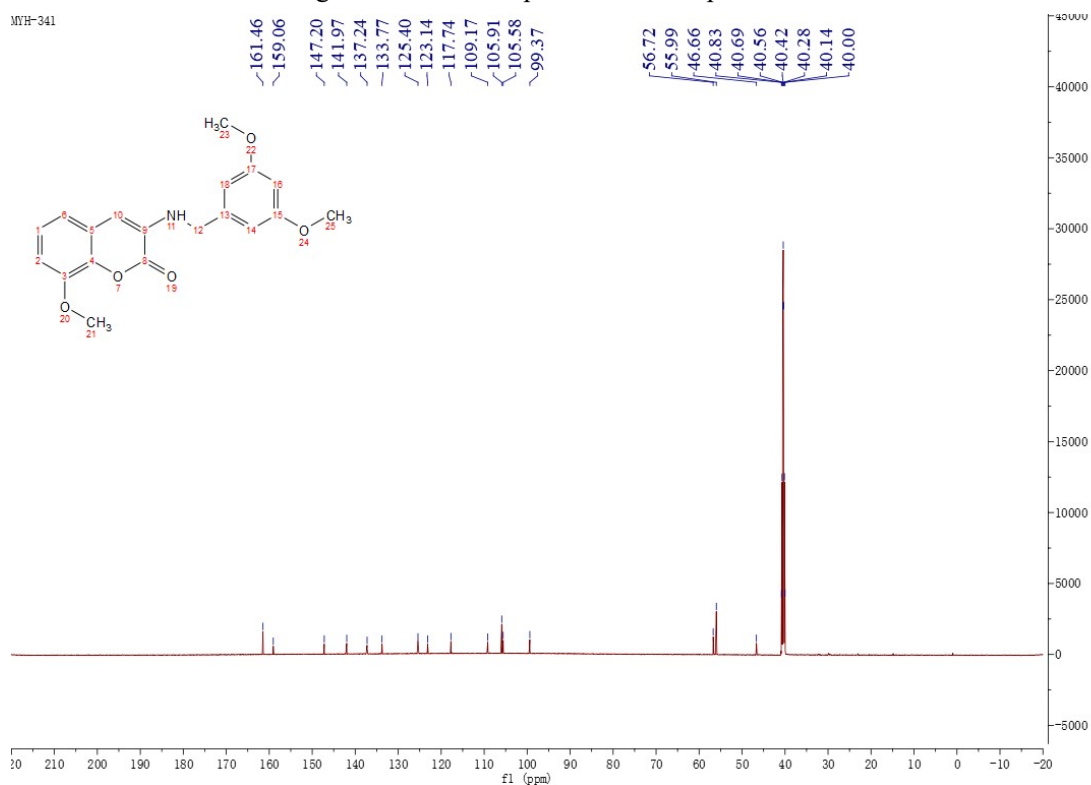

Figure 32  $^{13}\text{C}$ NMR Spectrum of Compound M11



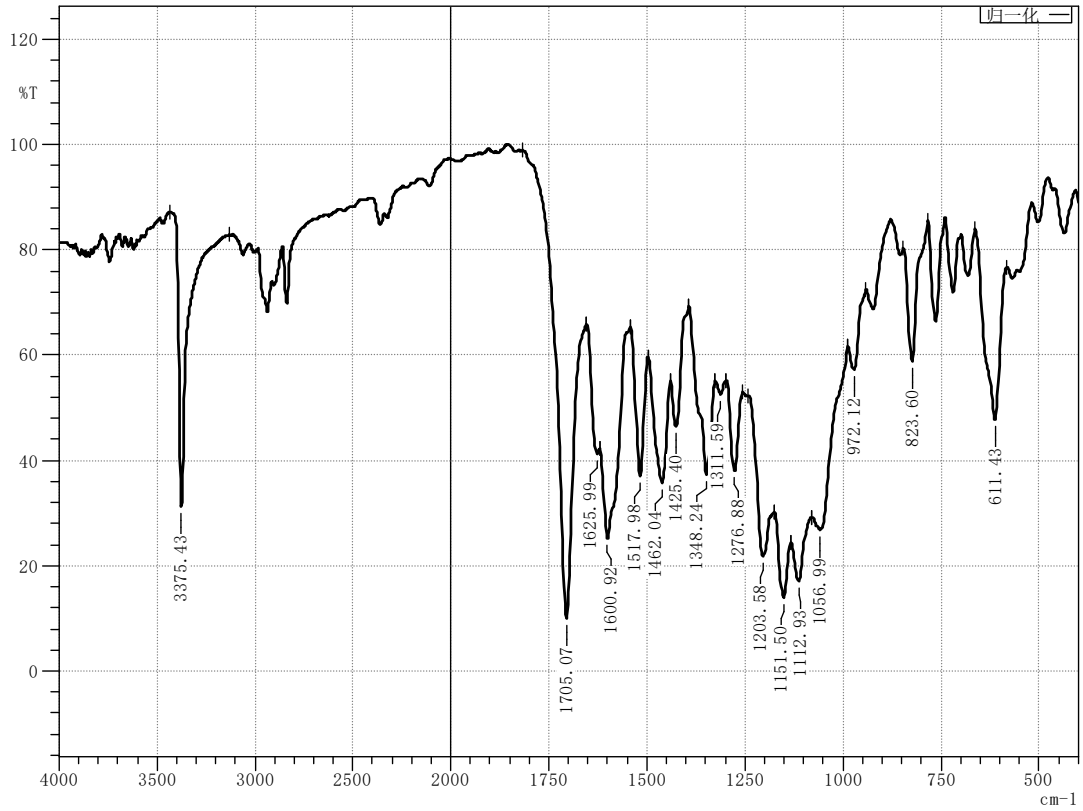

Figure 33 Infrared spectrum of compound M11

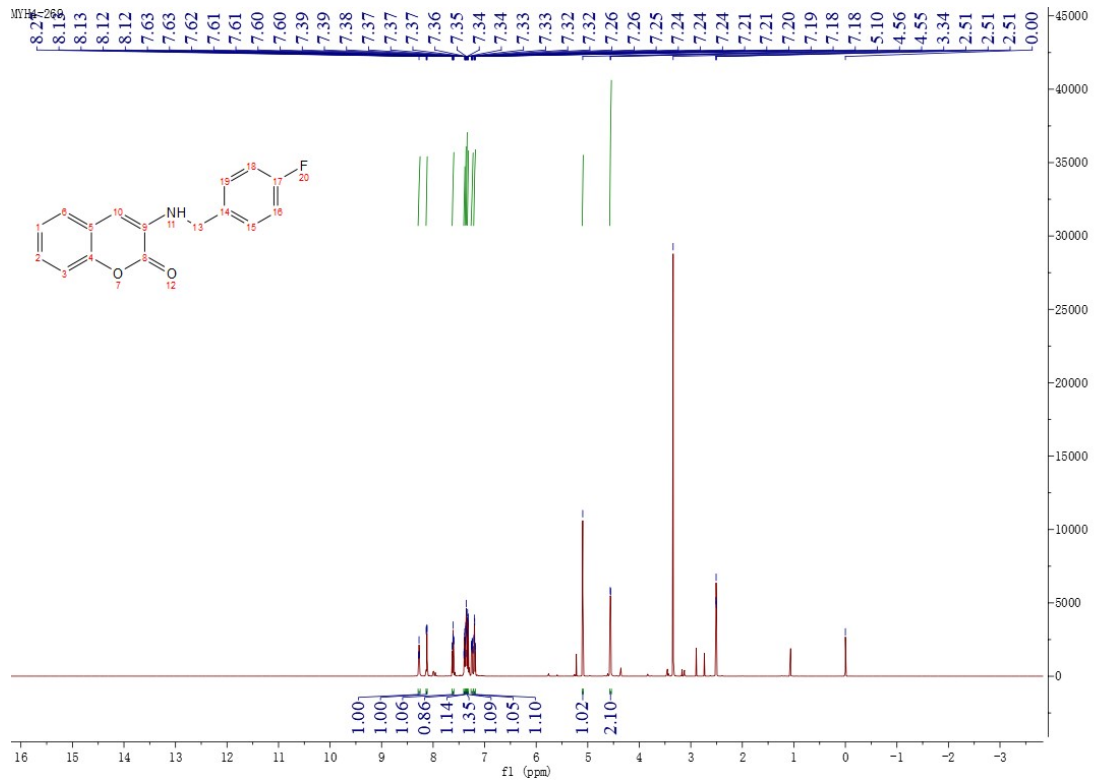

Figure 34 <sup>1</sup>H NMR Spectrum of Compound M12

M12-269

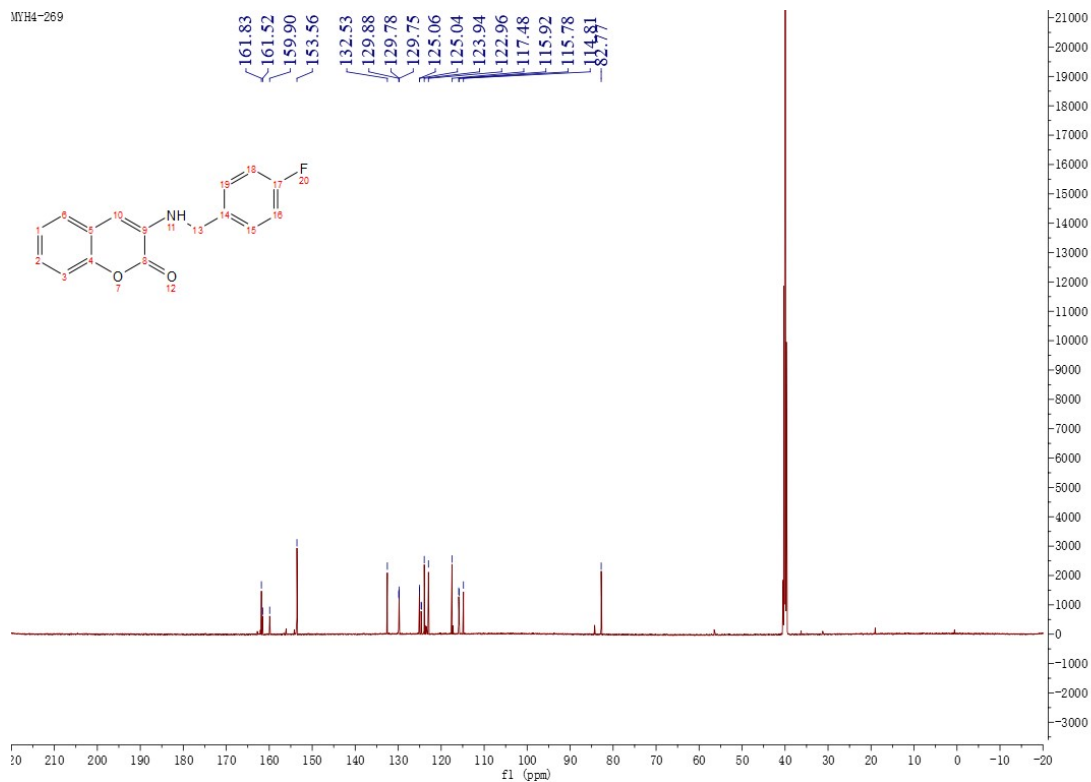

Figure 35  $^{13}\text{C}$ NMR Spectrum of Compound M12

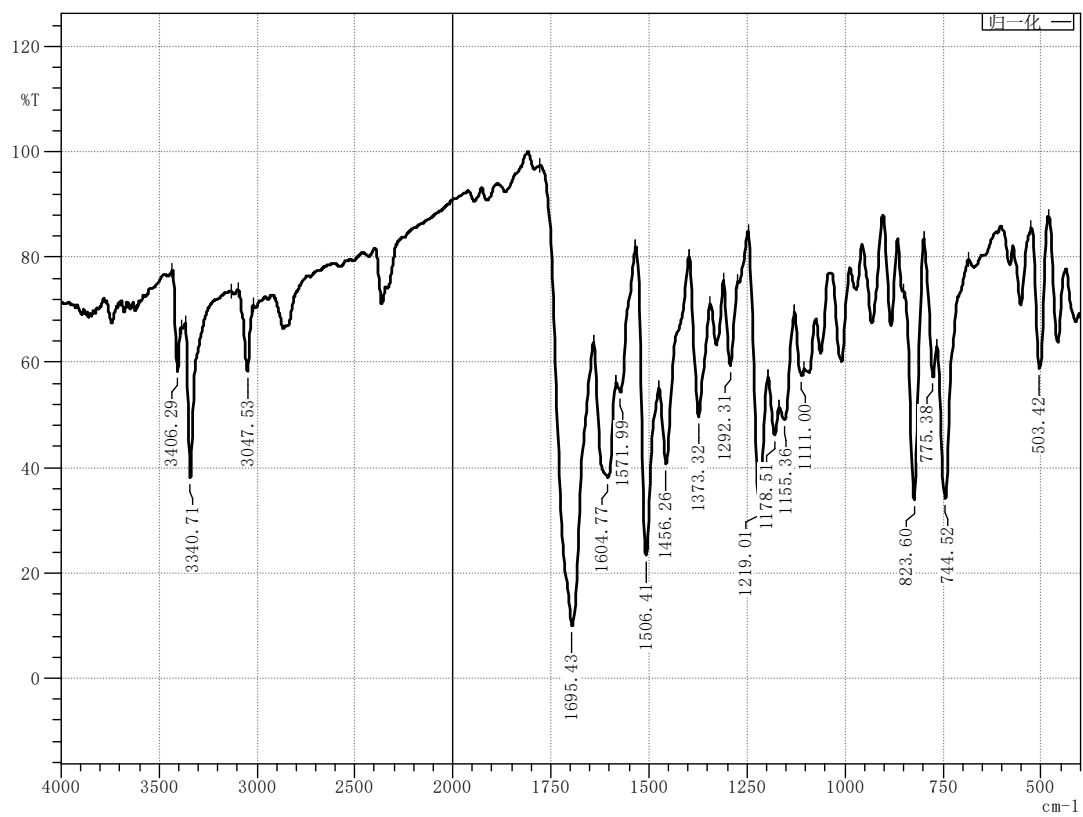

Figure 36 Infrared spectrum of compound M12

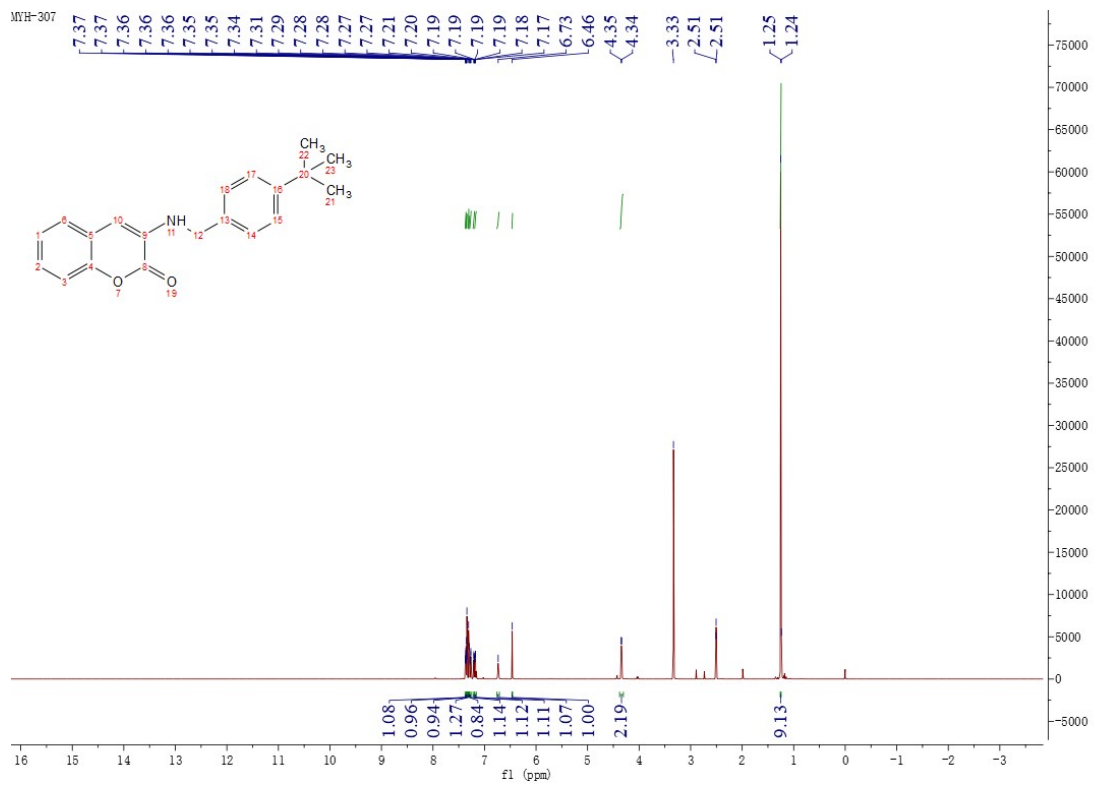

Figure 37 <sup>1</sup>H NMR Spectrum of Compound M13

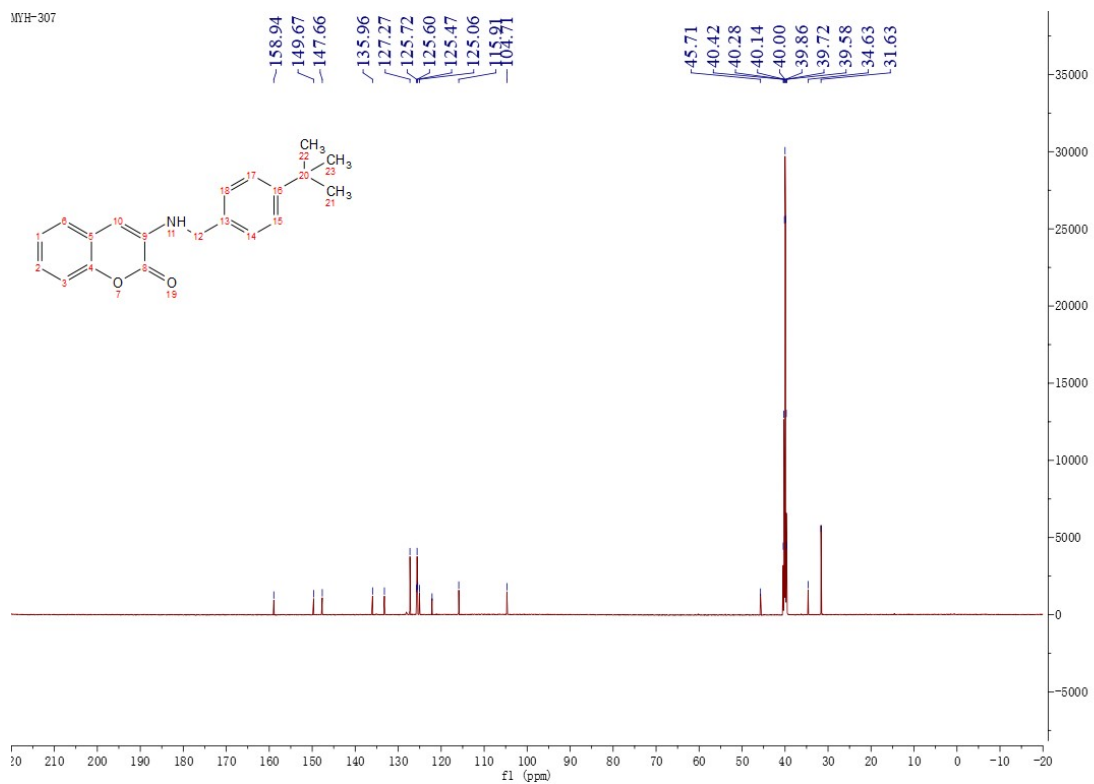

Figure 38 <sup>13</sup>C NMR Spectrum of Compound M13

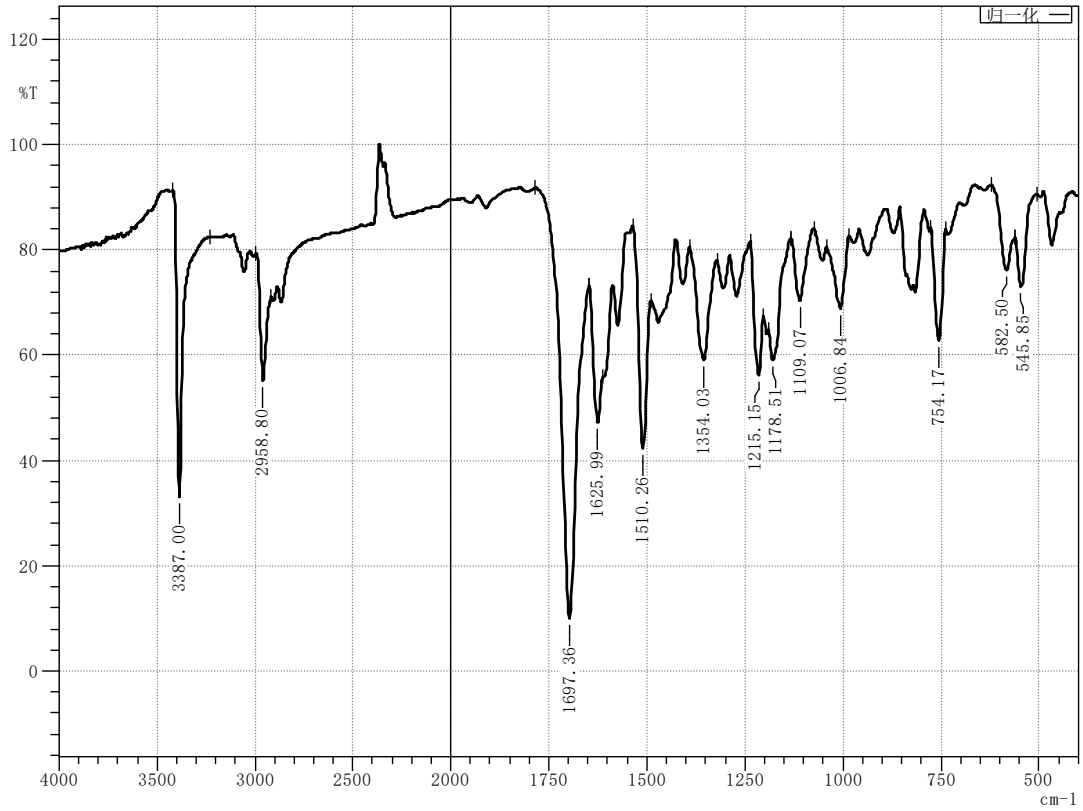

Figure 39 Infrared spectrum of compound M13

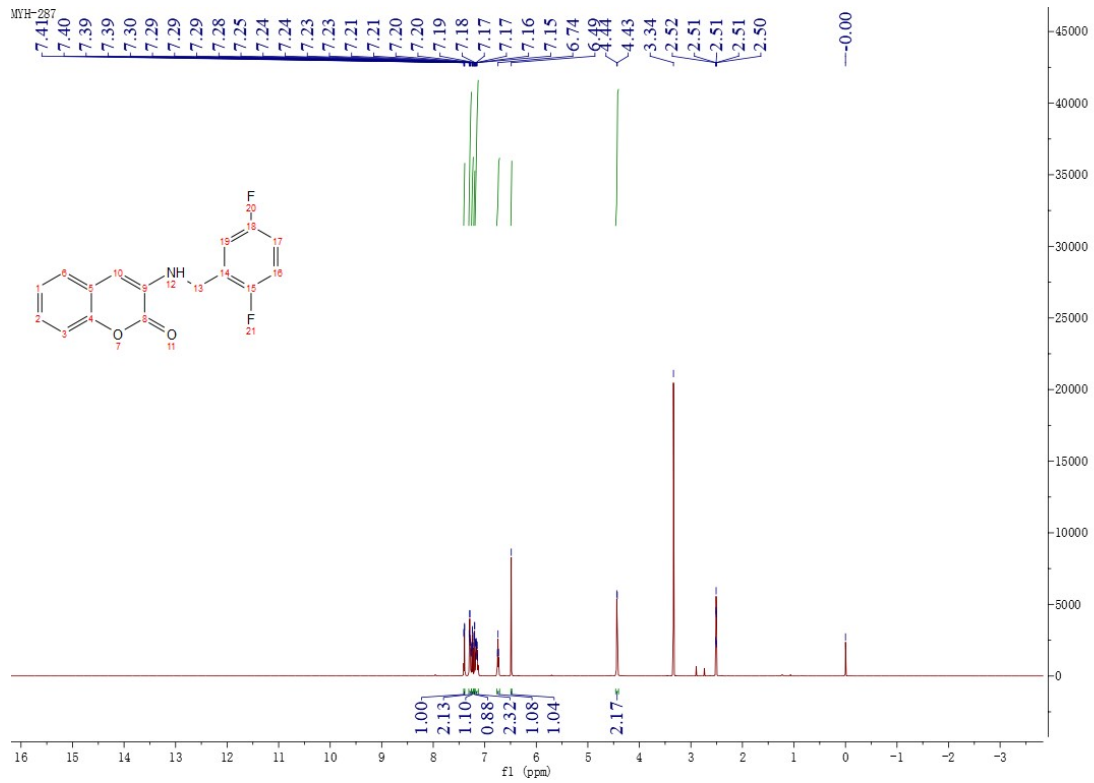

Figure 40 <sup>1</sup>H NMR Spectrum of Compound M14



MYH-323

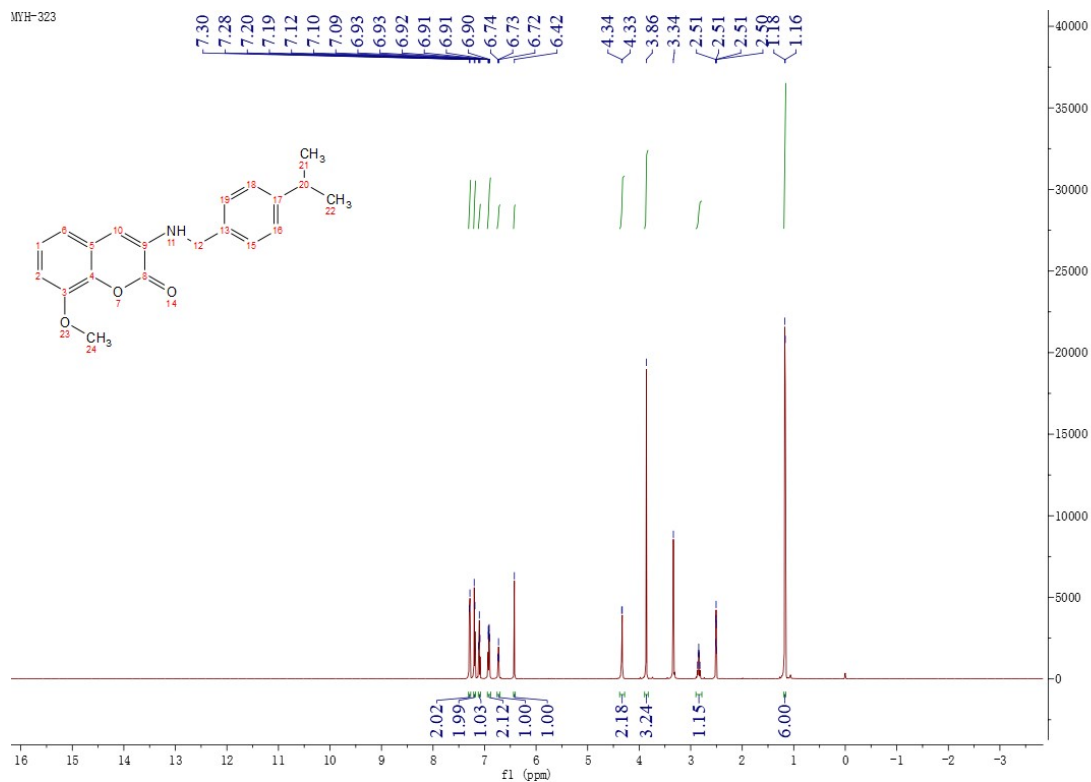

Figure 43  $^1\text{H NMR}$  Spectrum of Compound M15

MYH-323

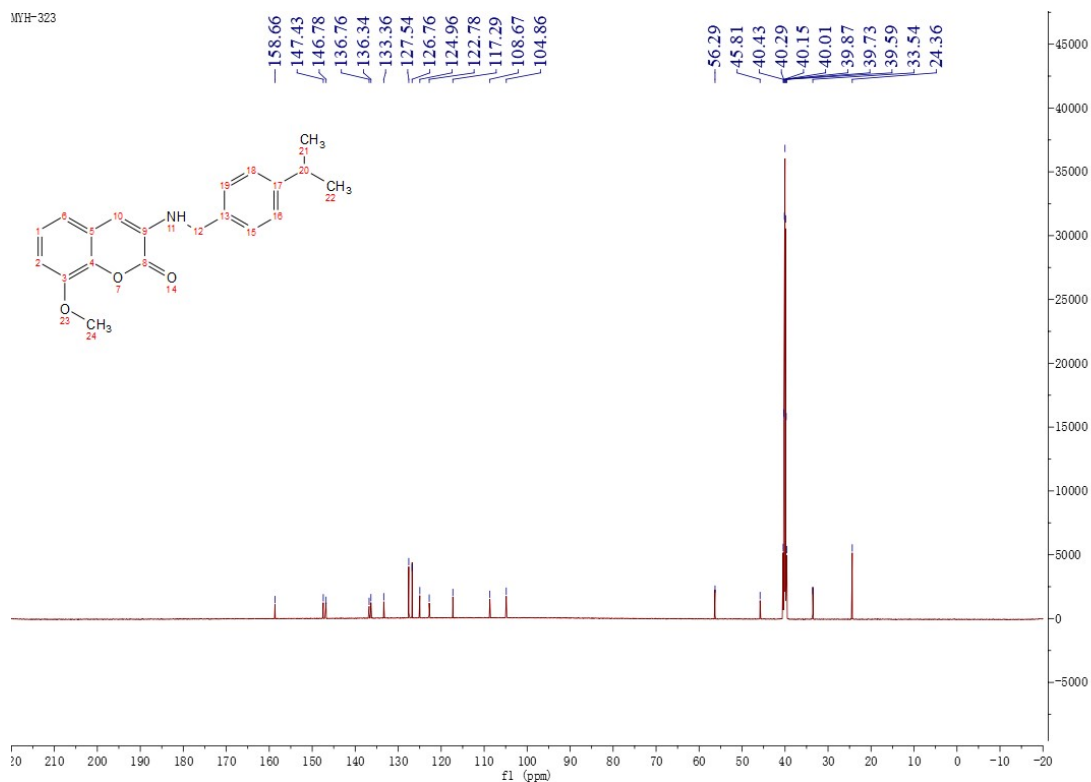

Figure 44  $^{13}\text{C NMR}$  Spectrum of Compound M15

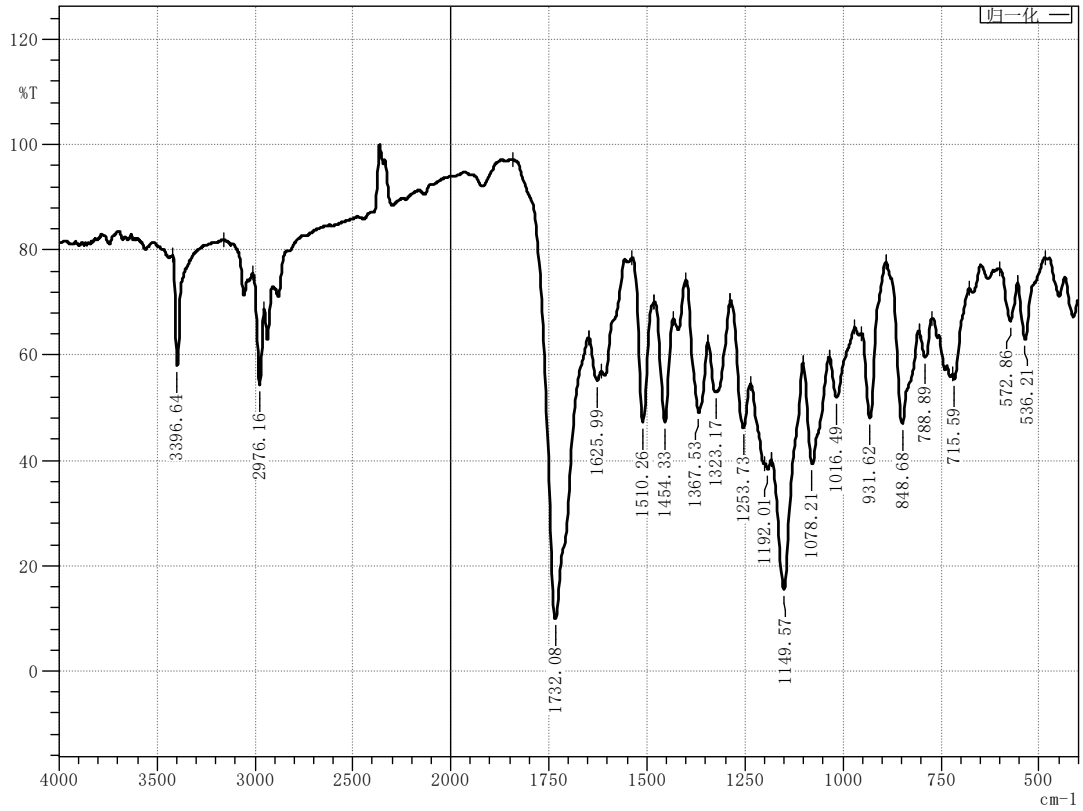

Figure 45 Infrared spectrum of compound M15

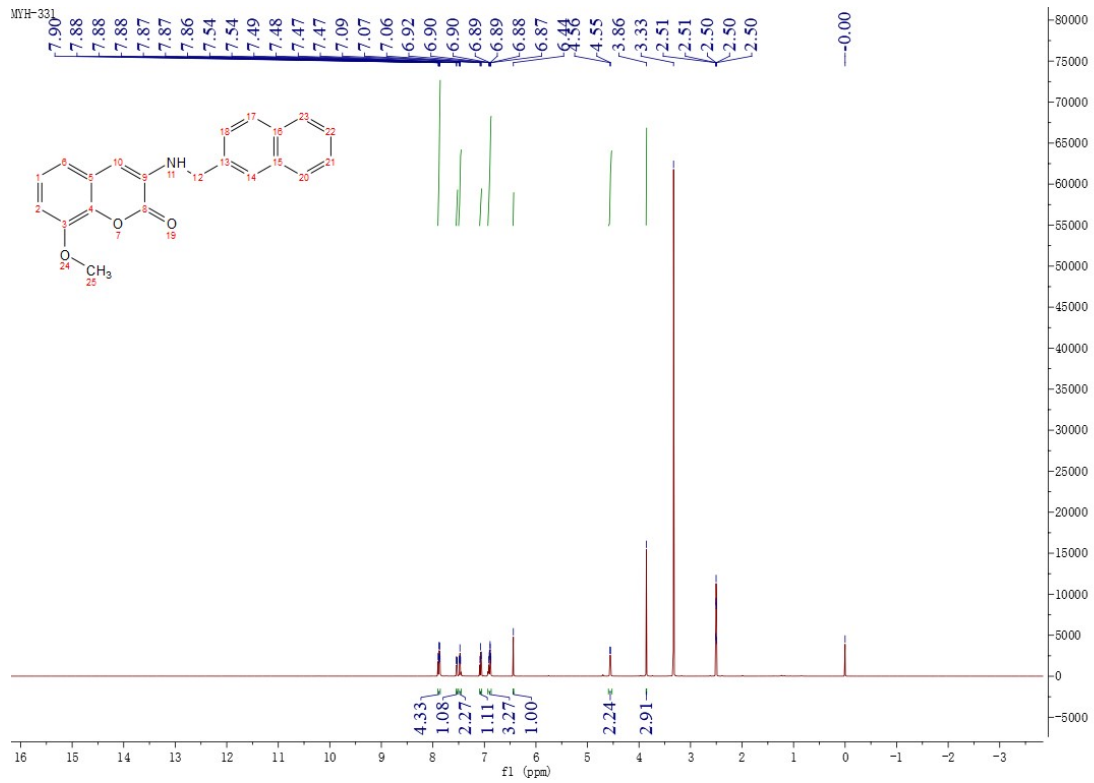

Figure 46 <sup>1</sup>H NMR Spectrum of Compound M16

MH-331

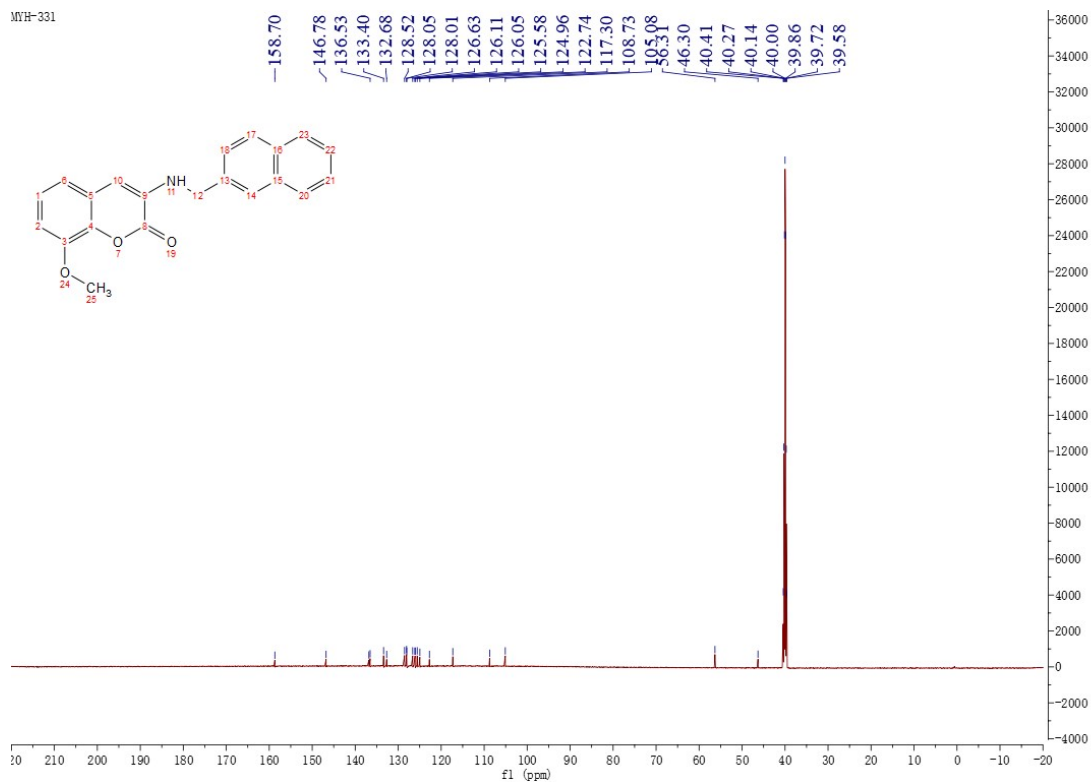

Figure 47 <sup>13</sup>C NMR Spectrum of Compound M16

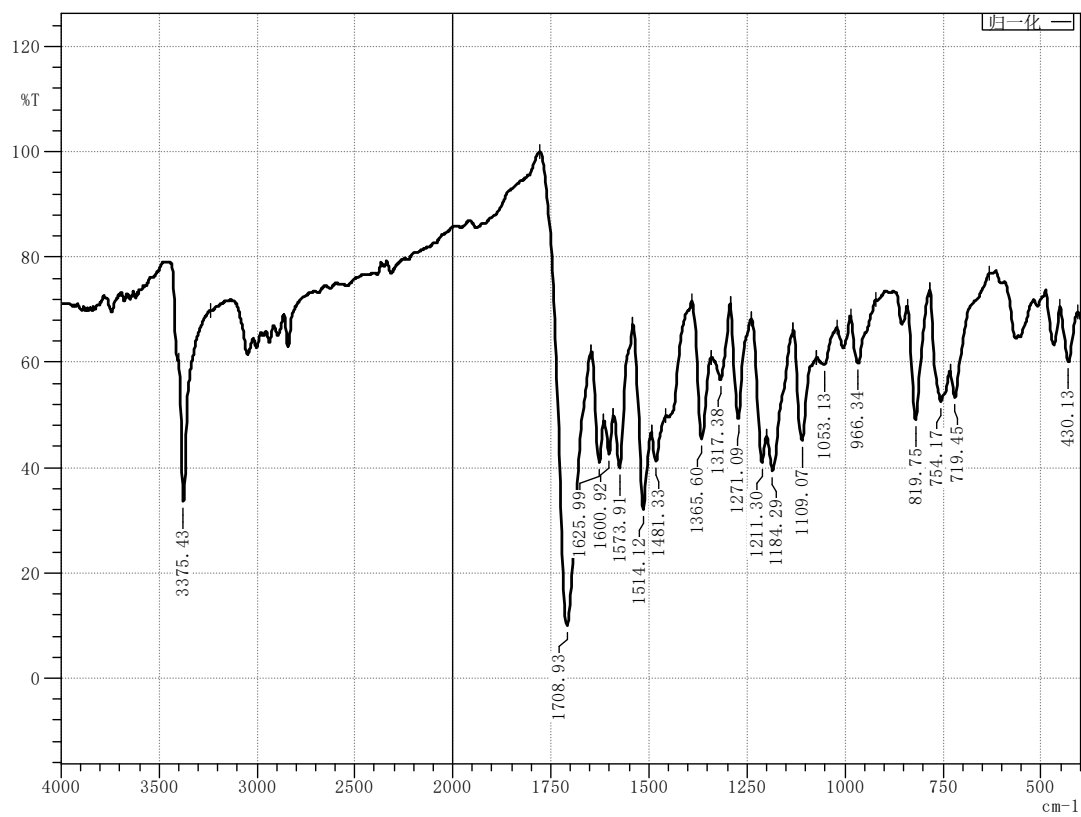

Figure 48 Infrared spectrum of compound M16



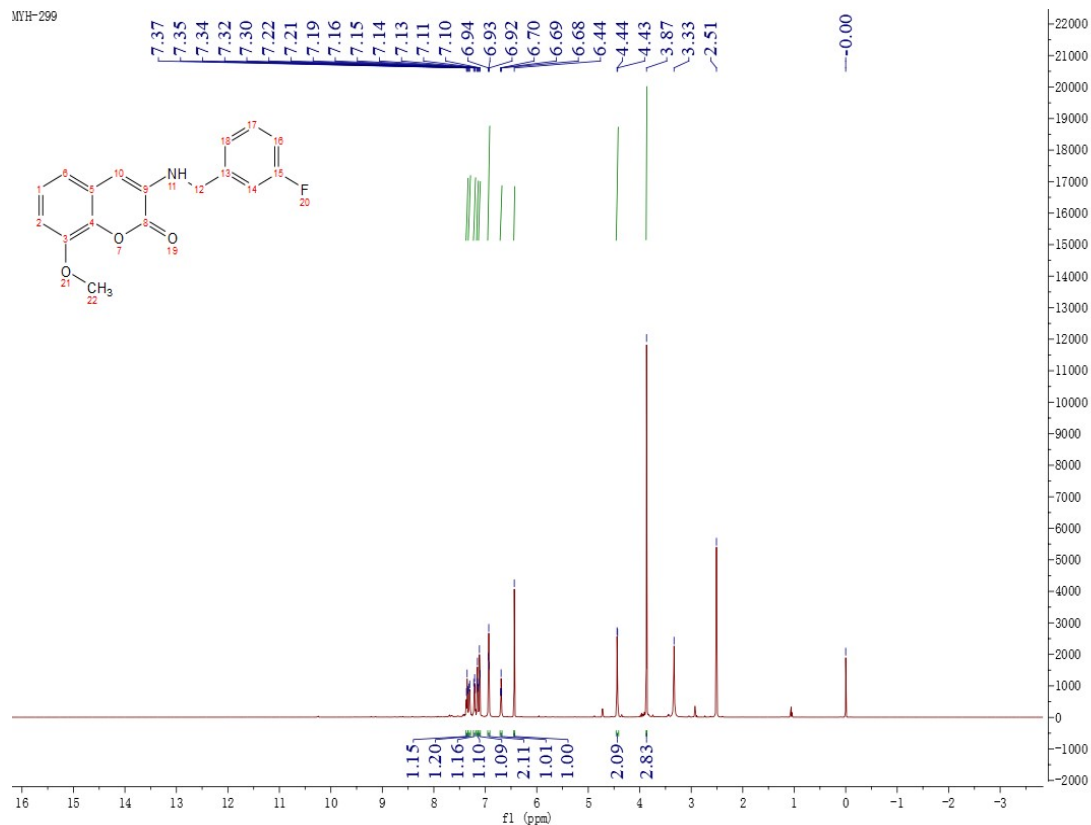

Figure 49  $^1\text{H NMR}$  Spectrum of Compound M17

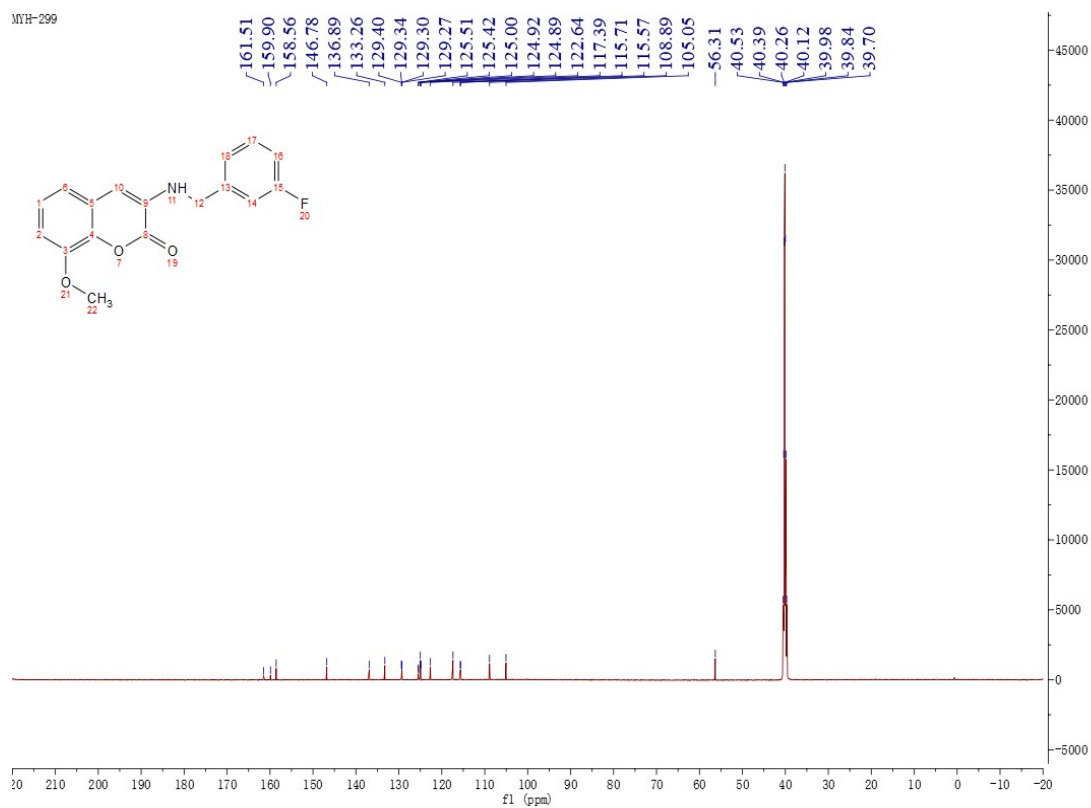

Figure 50  $^{13}\text{C NMR}$  Spectrum of Compound M17

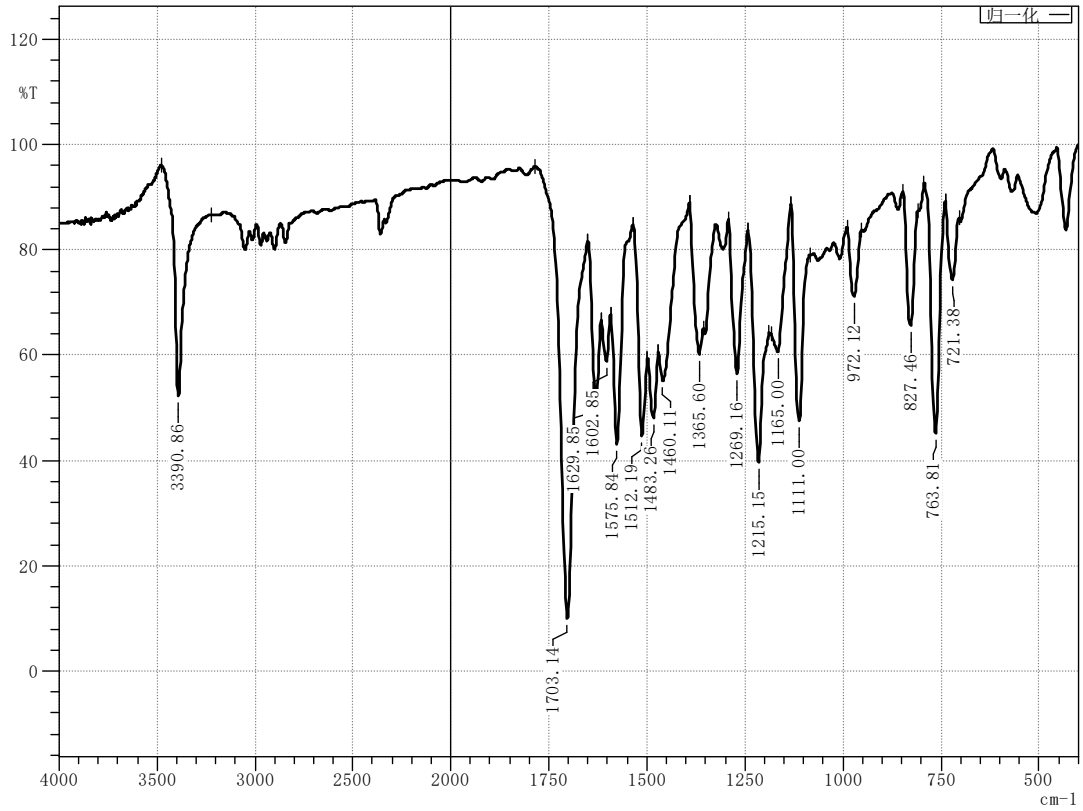

Figure 51 Infrared spectrum of compound M17

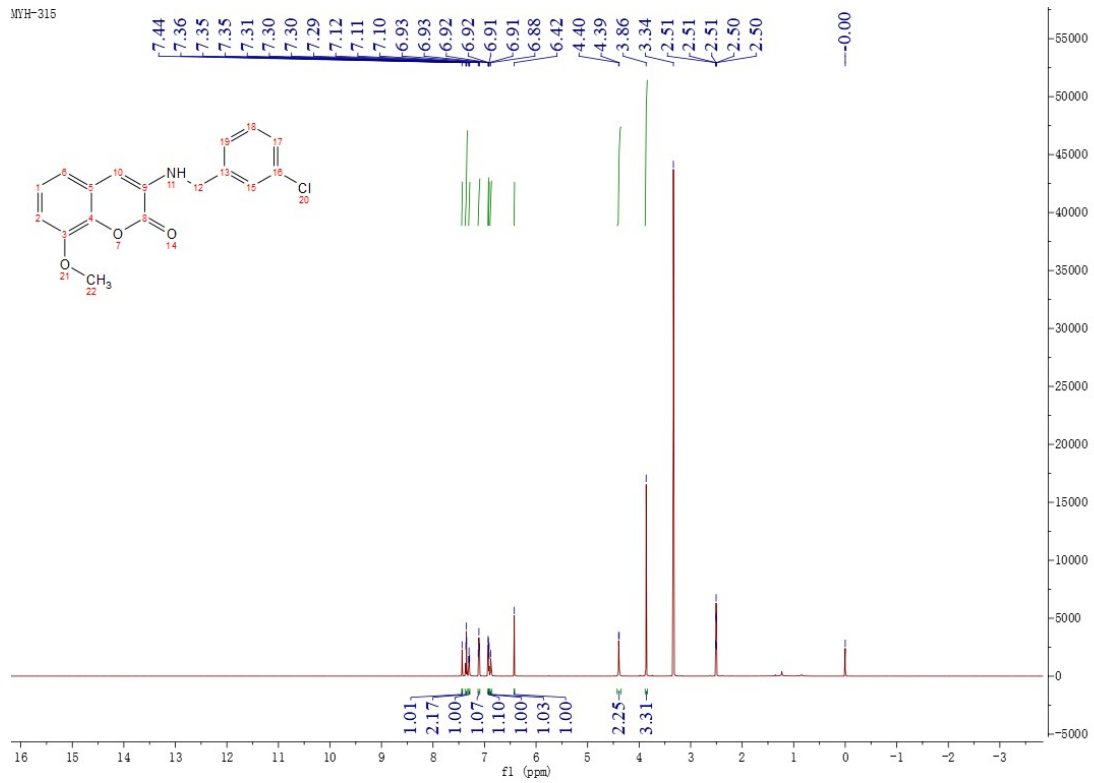

Figure 52 <sup>1</sup>H NMR Spectrum of Compound M18

MH-315

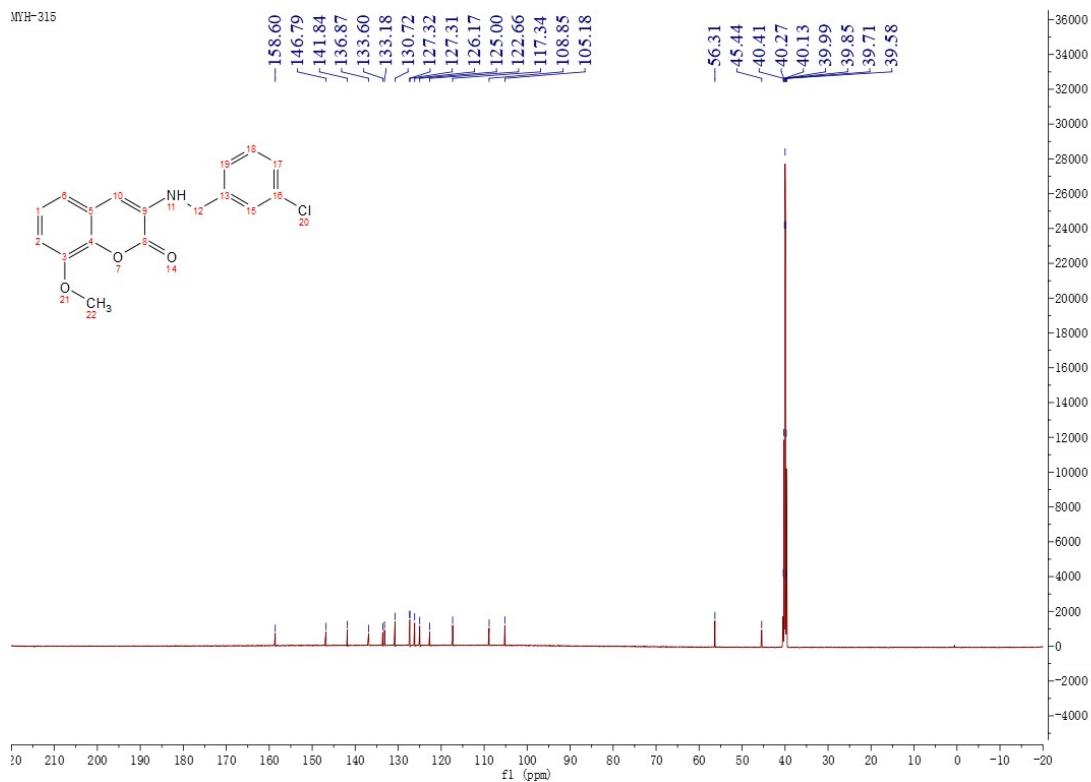

Figure 53  $^{13}\text{C}$ NMR Spectrum of Compound M18

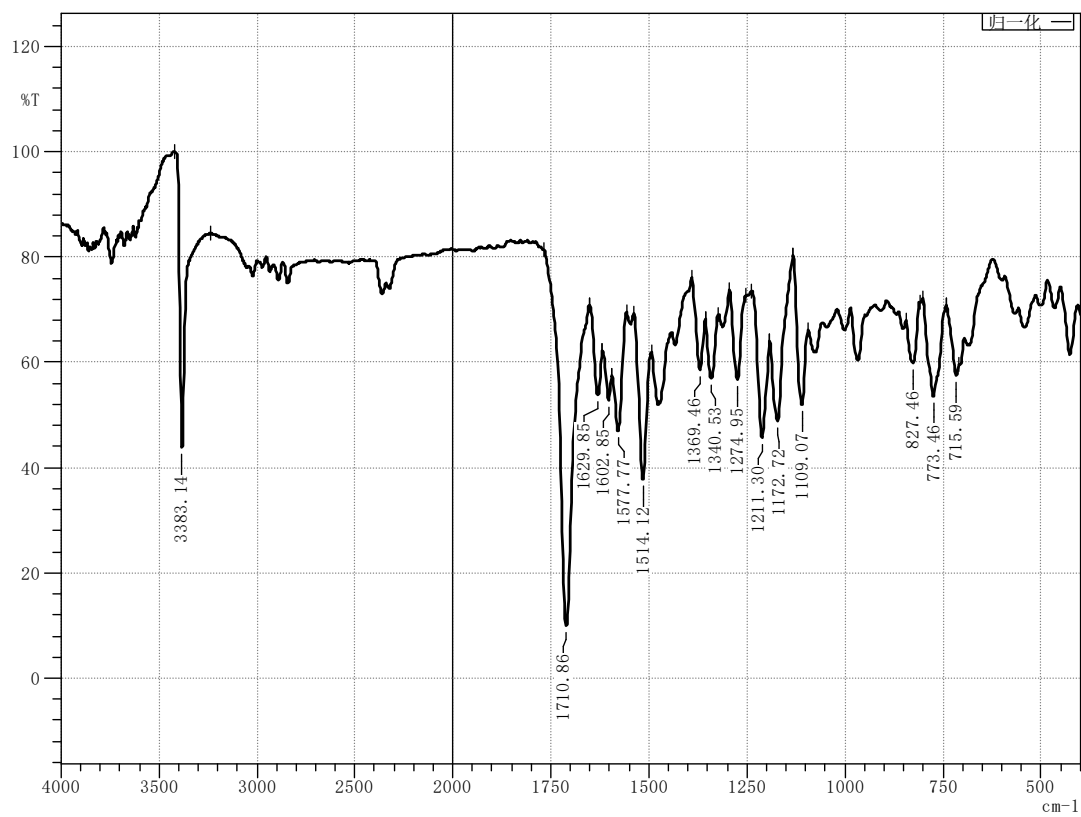

Figure 54 Infrared spectrum of compound M18



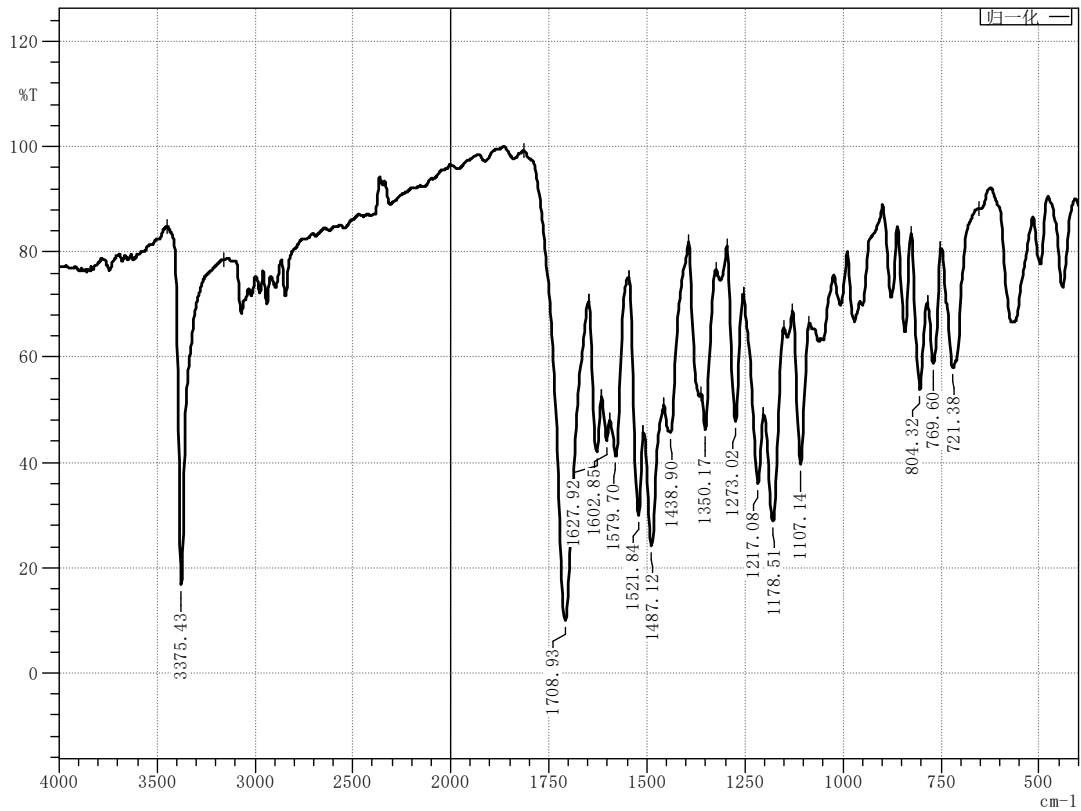

Figure 57 Infrared spectrum of compound M19

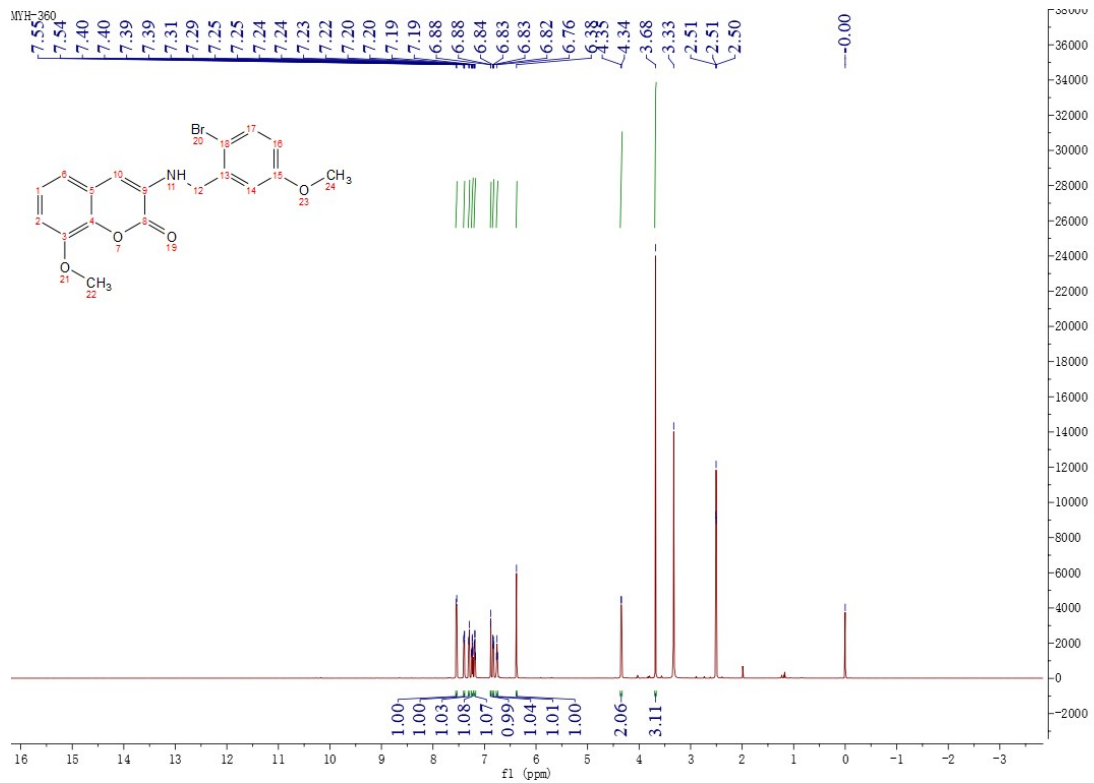

Figure 58 <sup>1</sup>H NMR Spectrum of Compound M20

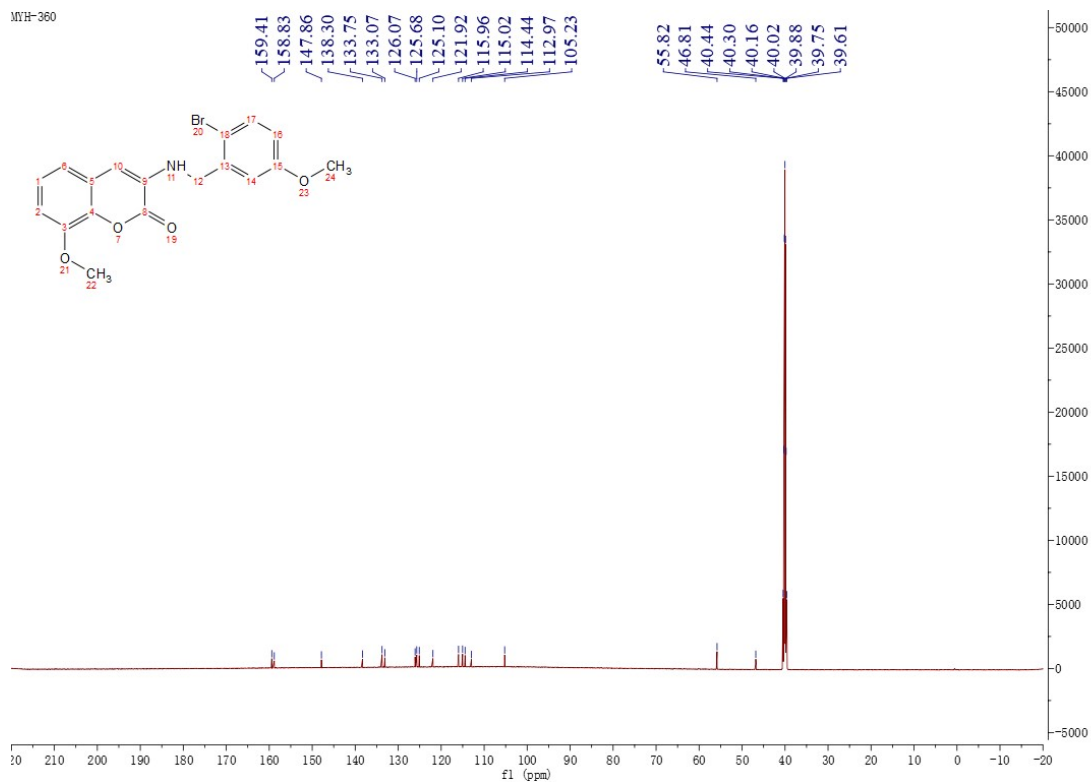

Figure 59 <sup>13</sup>CNMR Spectrum of Compound M20

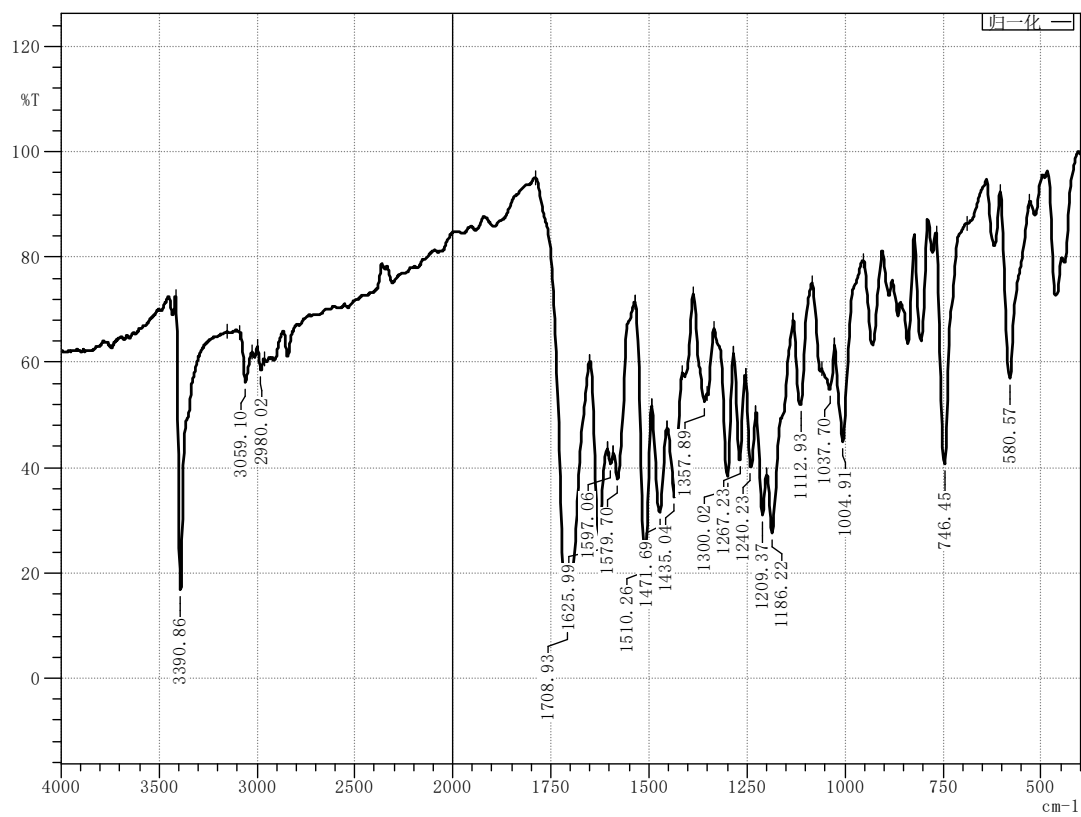

Figure 60 Infrared spectrum of compound M20

MTH-295

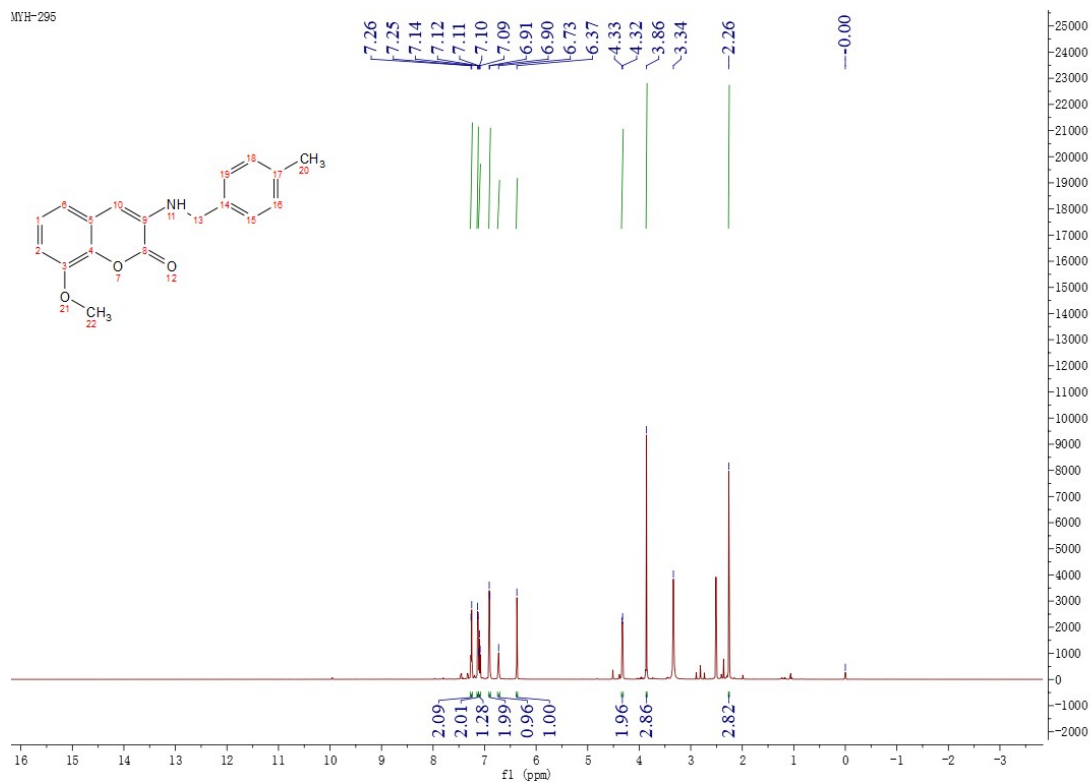

Figure 61 <sup>1</sup>H NMR Spectrum of Compound M21

MTH-295

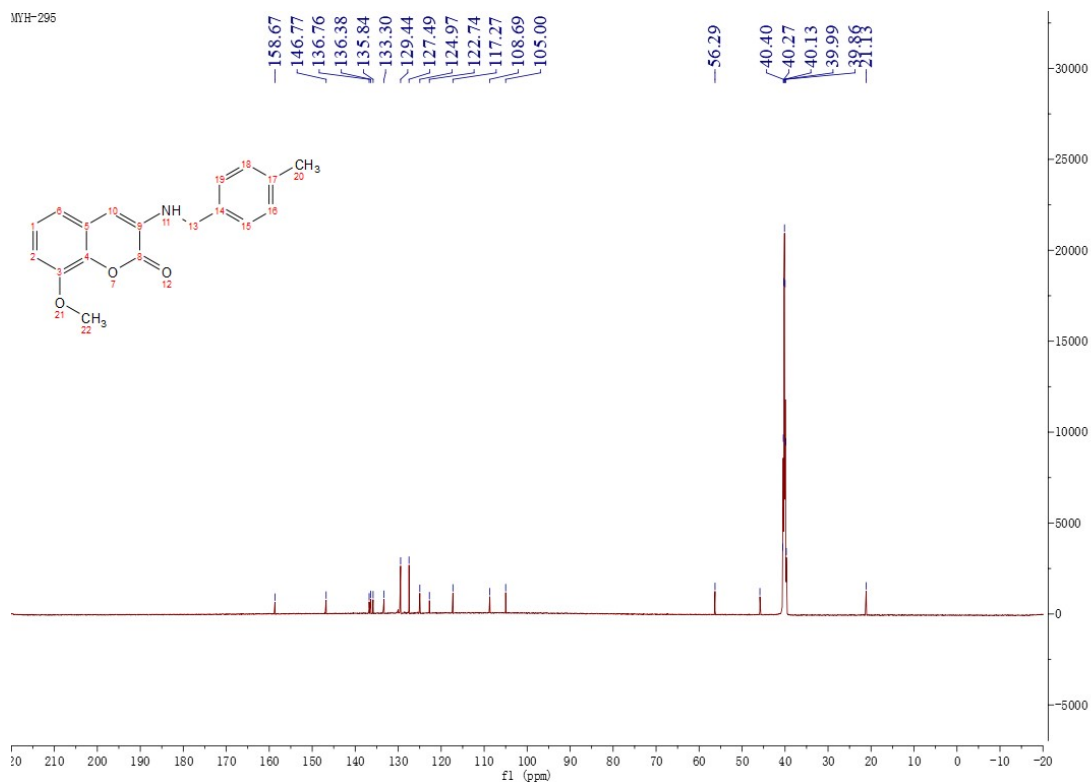

Figure 62 <sup>13</sup>C NMR Spectrum of Compound M21

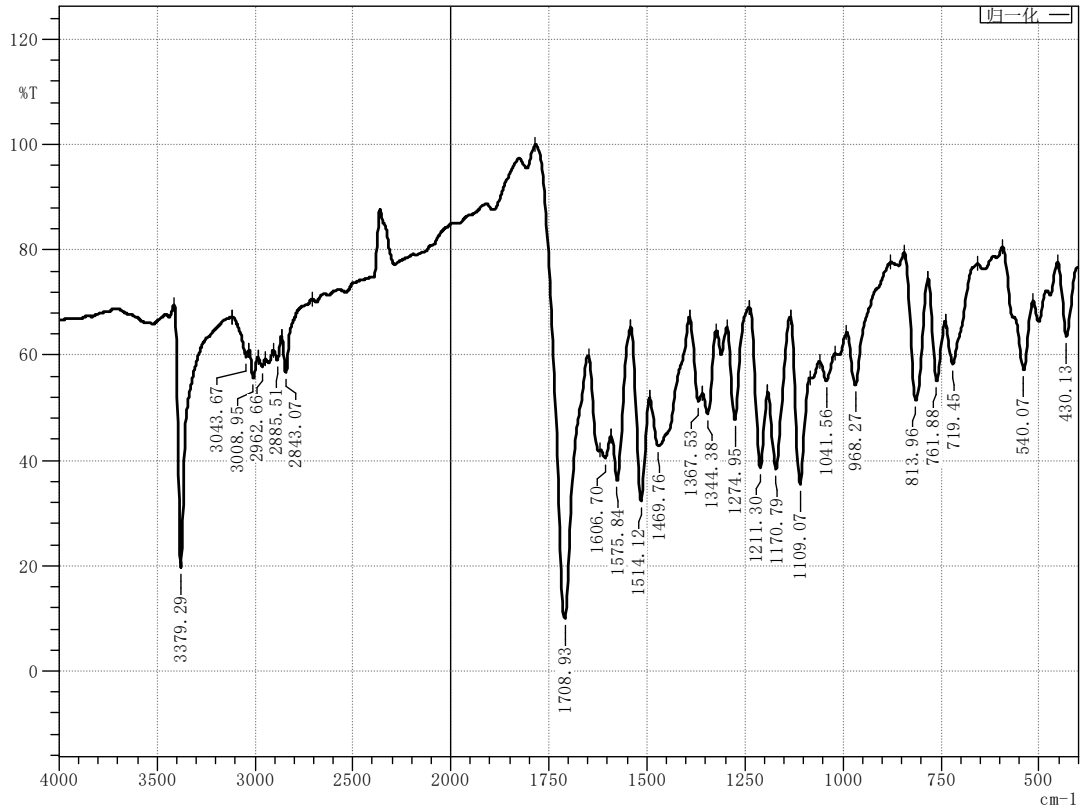

Figure 63 Infrared spectrum of compound M21

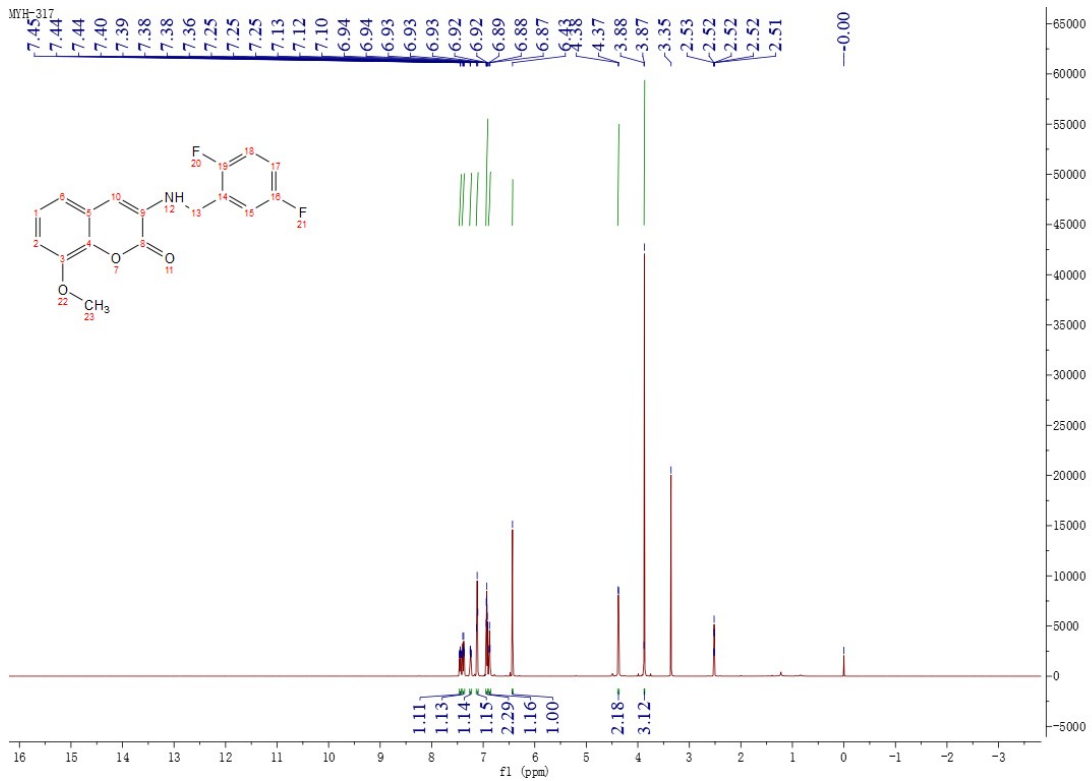

Figure 64 <sup>1</sup>H NMR Spectrum of Compound M22



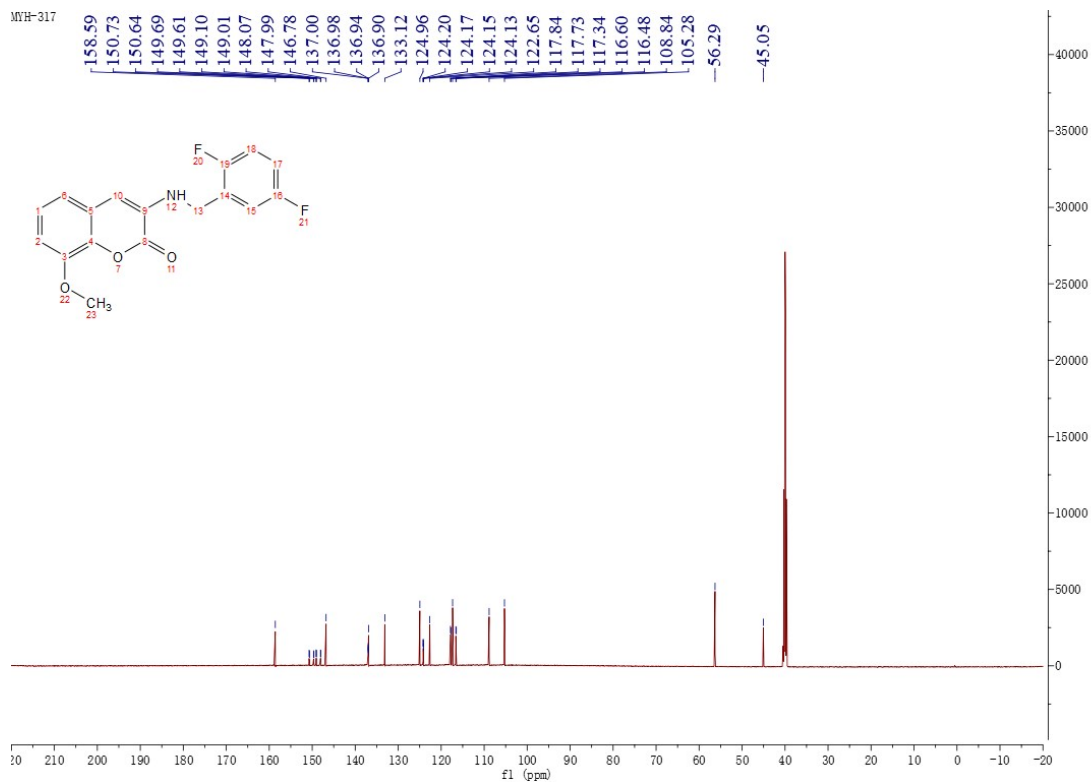

Figure 65 <sup>13</sup>C NMR Spectrum of Compound M22

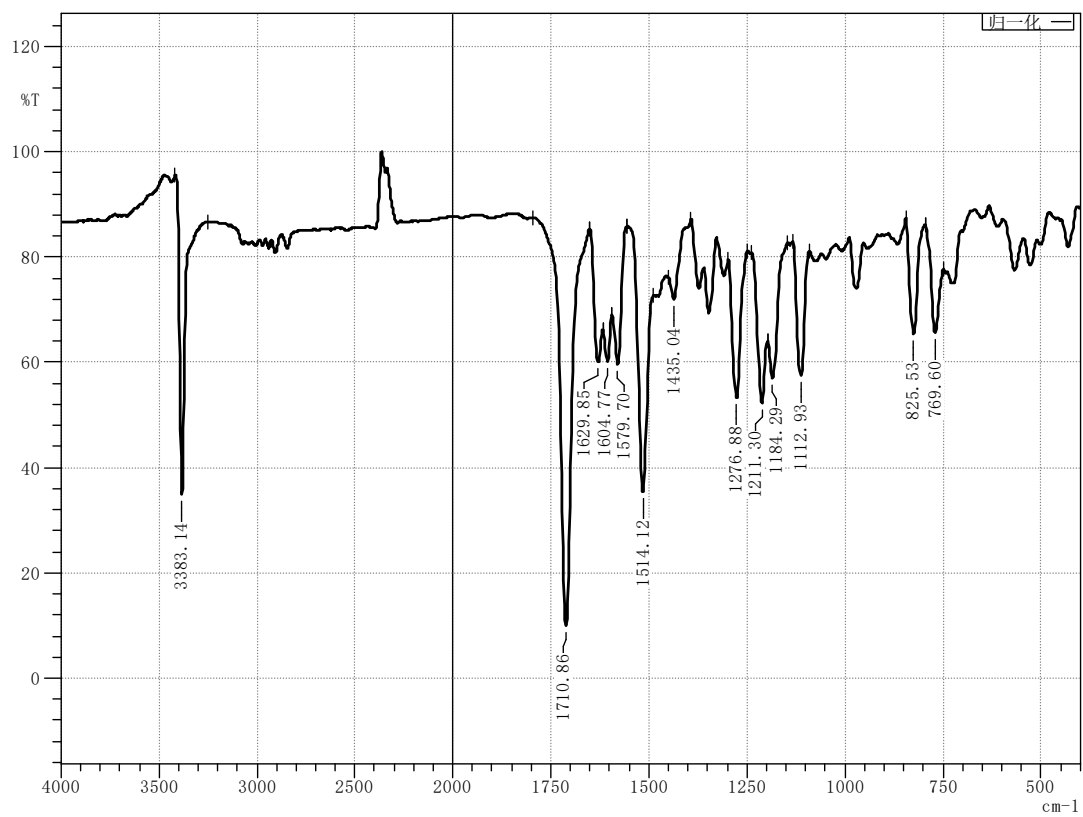

Figure 66 Infrared spectrum of compound M22

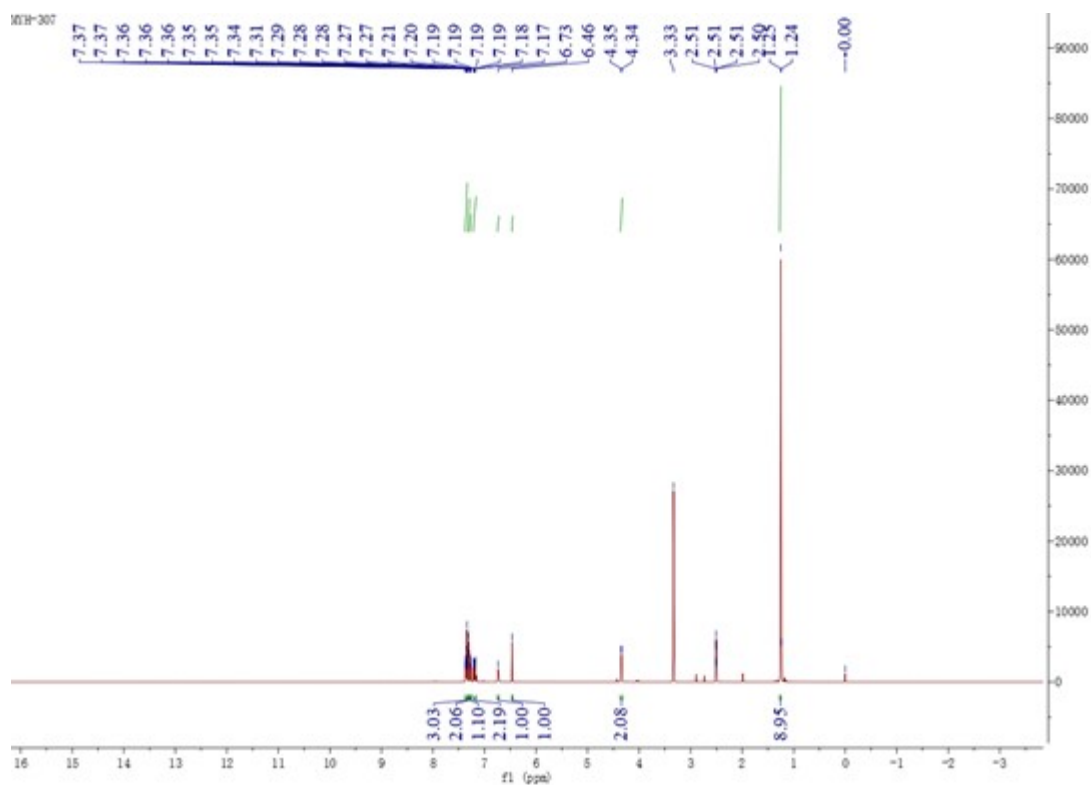

Figure 67 <sup>1</sup>H NMR Spectrum of Compound M23

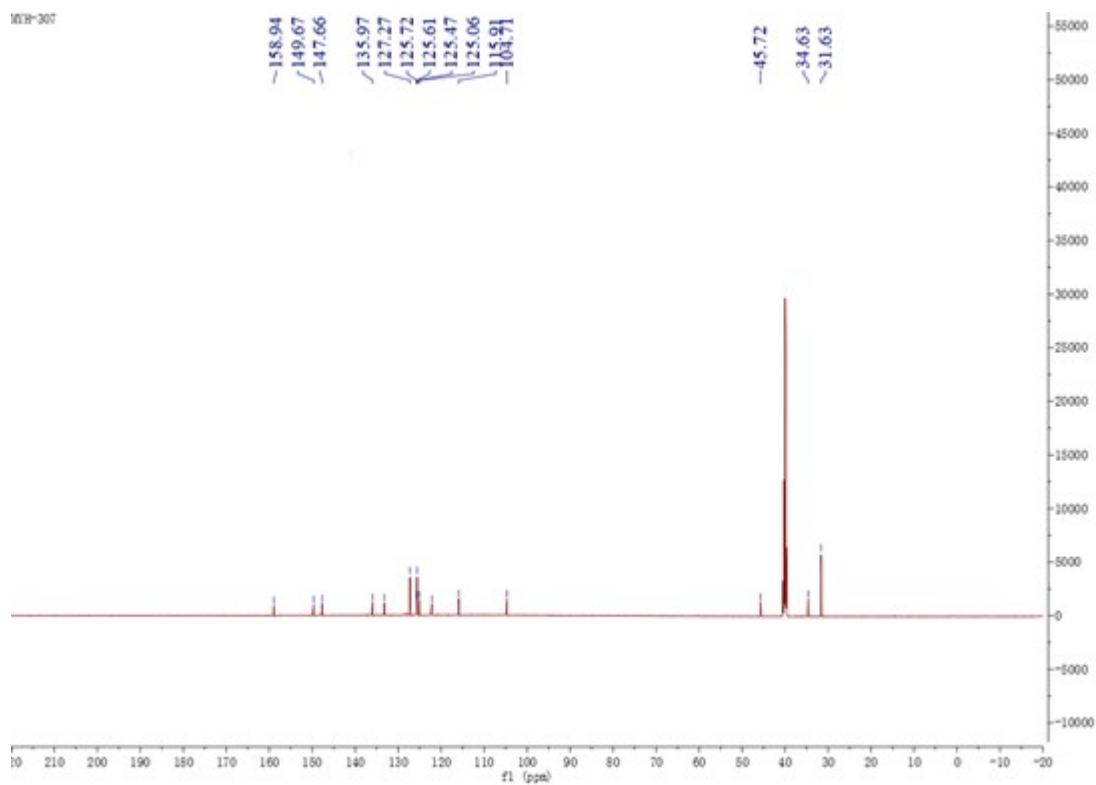

Figure 68 <sup>13</sup>CNMR Spectrum of Compound M23

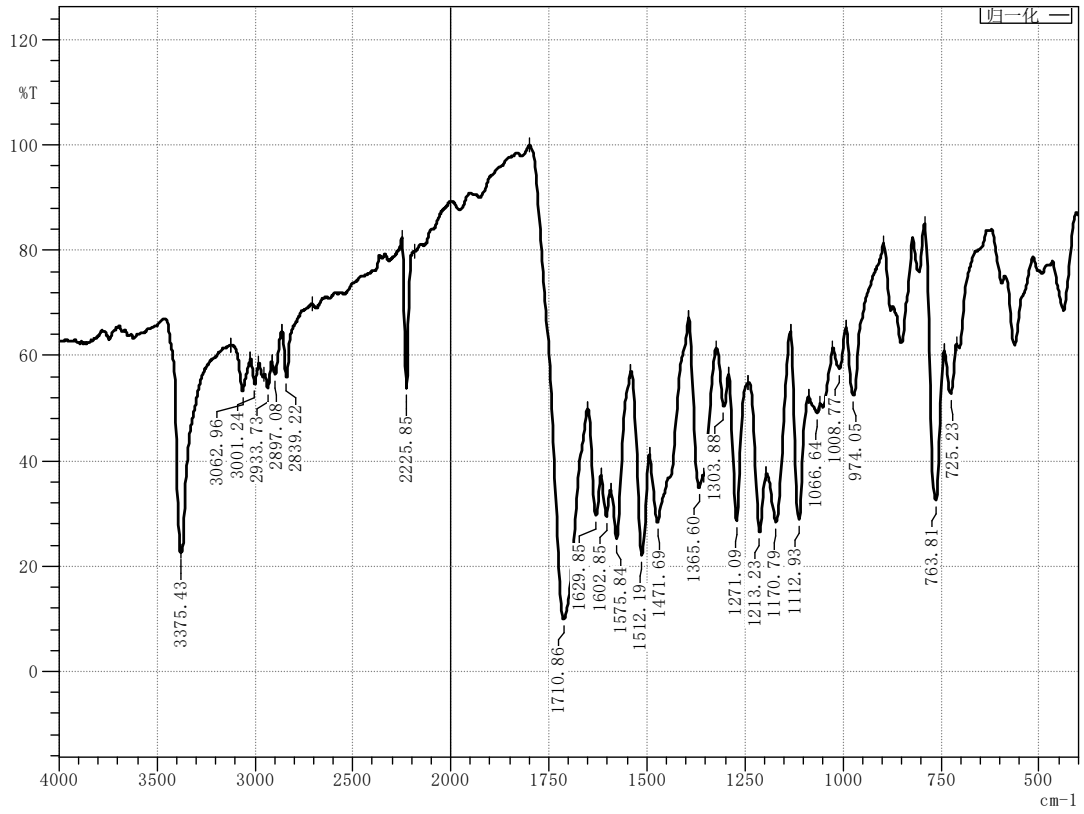

Figure 69 Infrared spectrum of compound M23

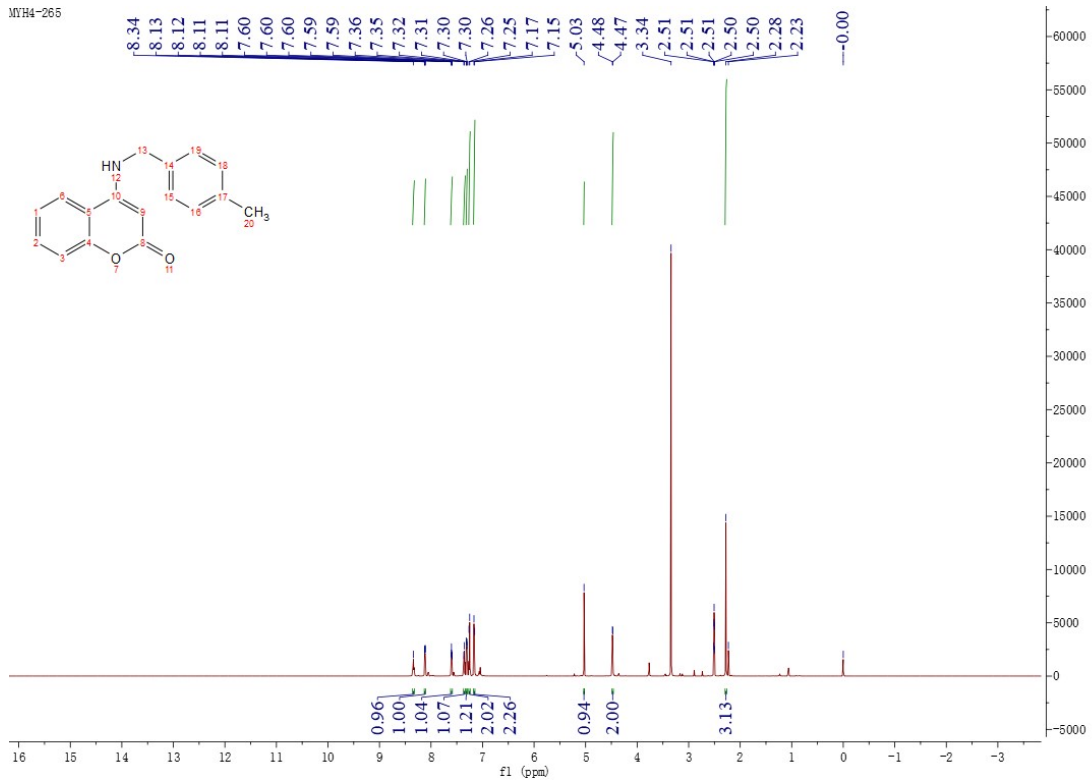

Figure 70 <sup>1</sup>H NMR Spectrum of Compound M24

M24-265

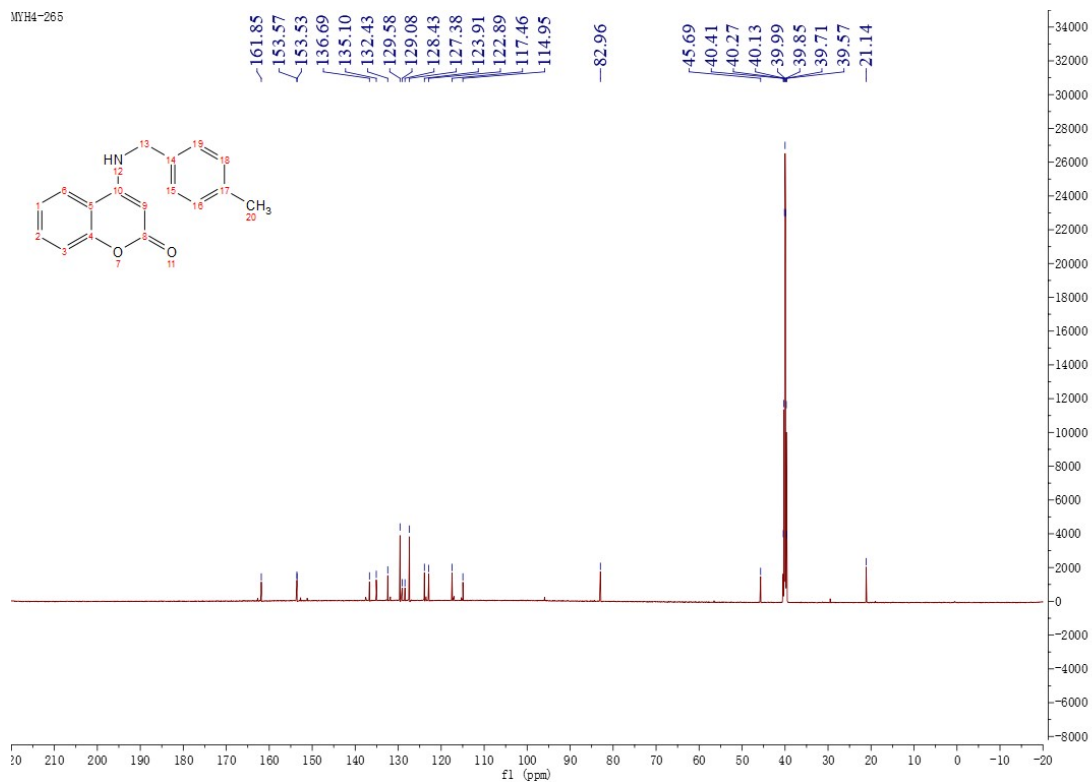

Figure 71 <sup>13</sup>CNMR Spectrum of Compound M24

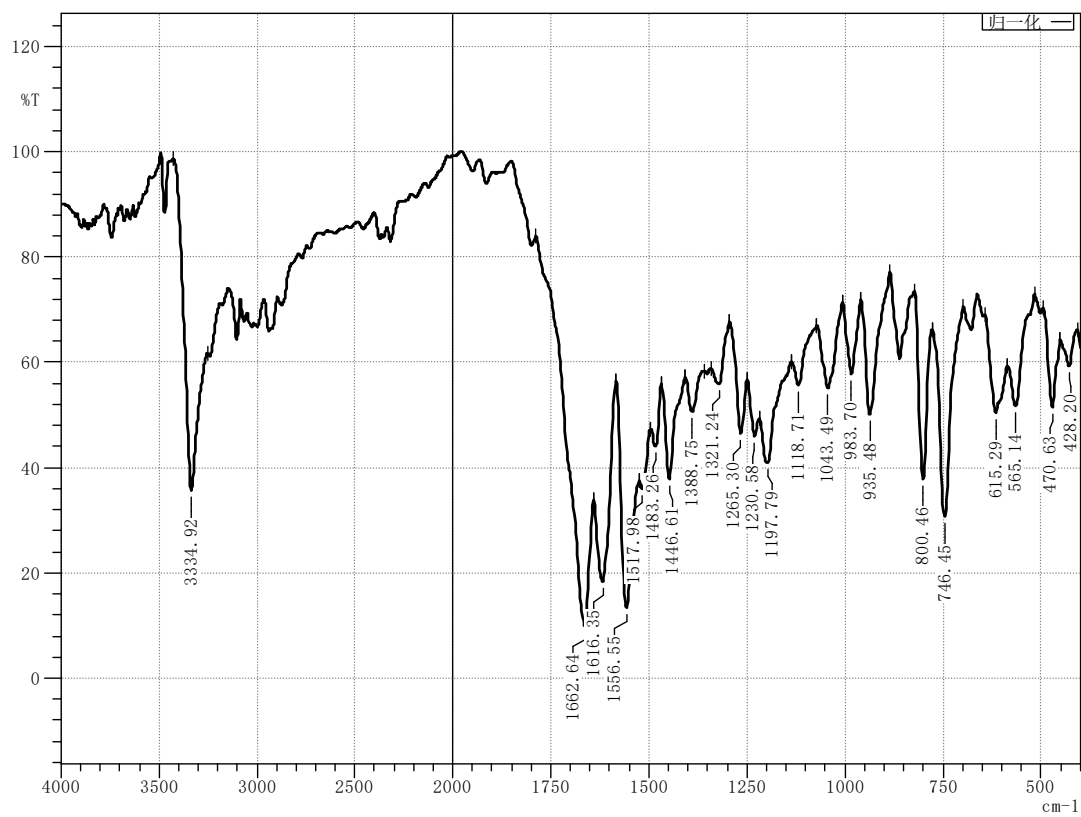

Figure 72 Infrared spectrum of compound M24

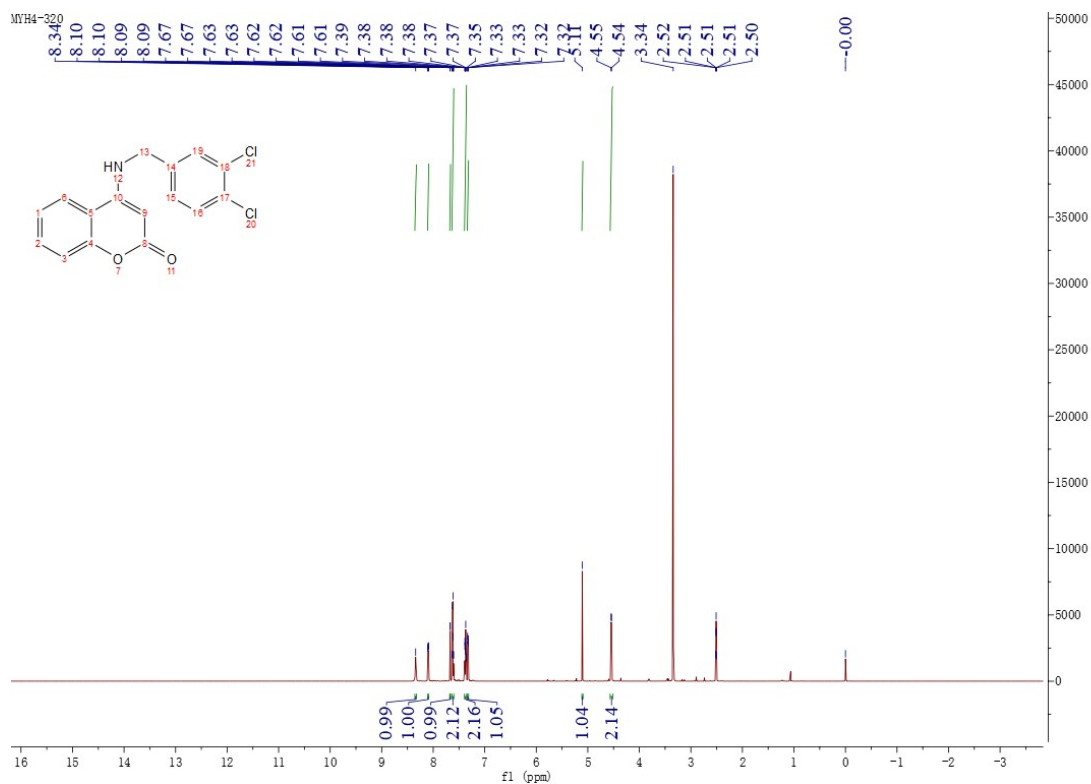

Figure 73  $^1\text{H}$ NMR Spectrum of Compound M25

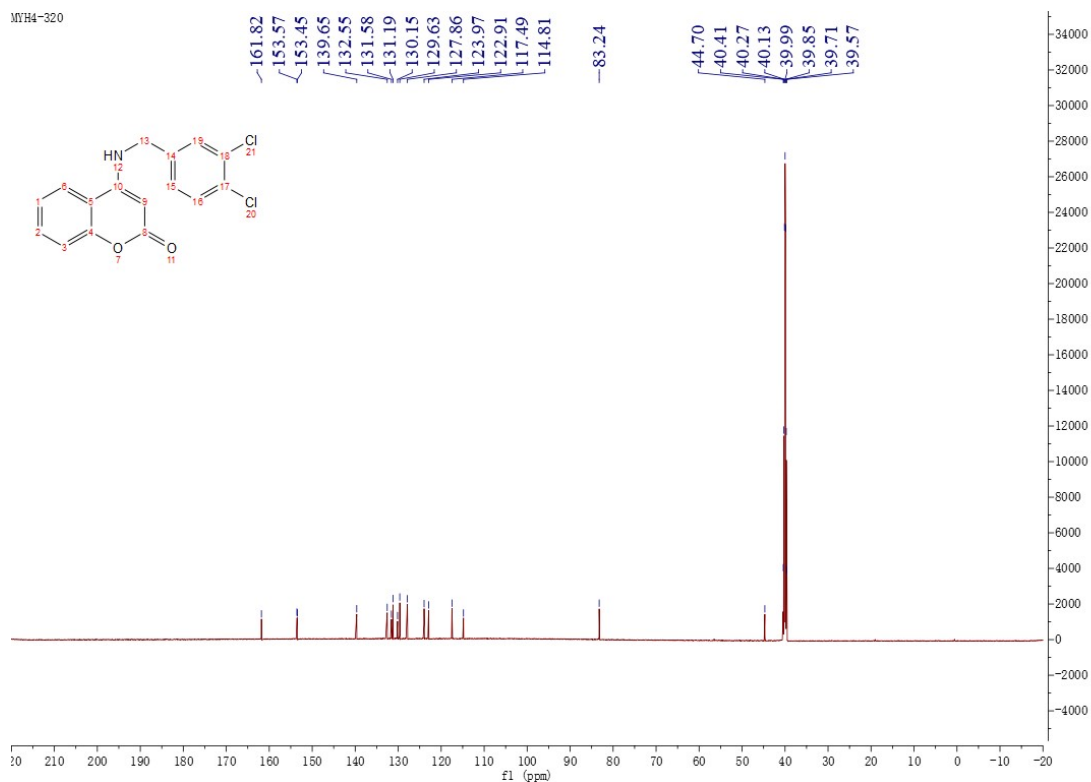

Figure 74  $^{13}\text{C}$ NMR Spectrum of Compound M25

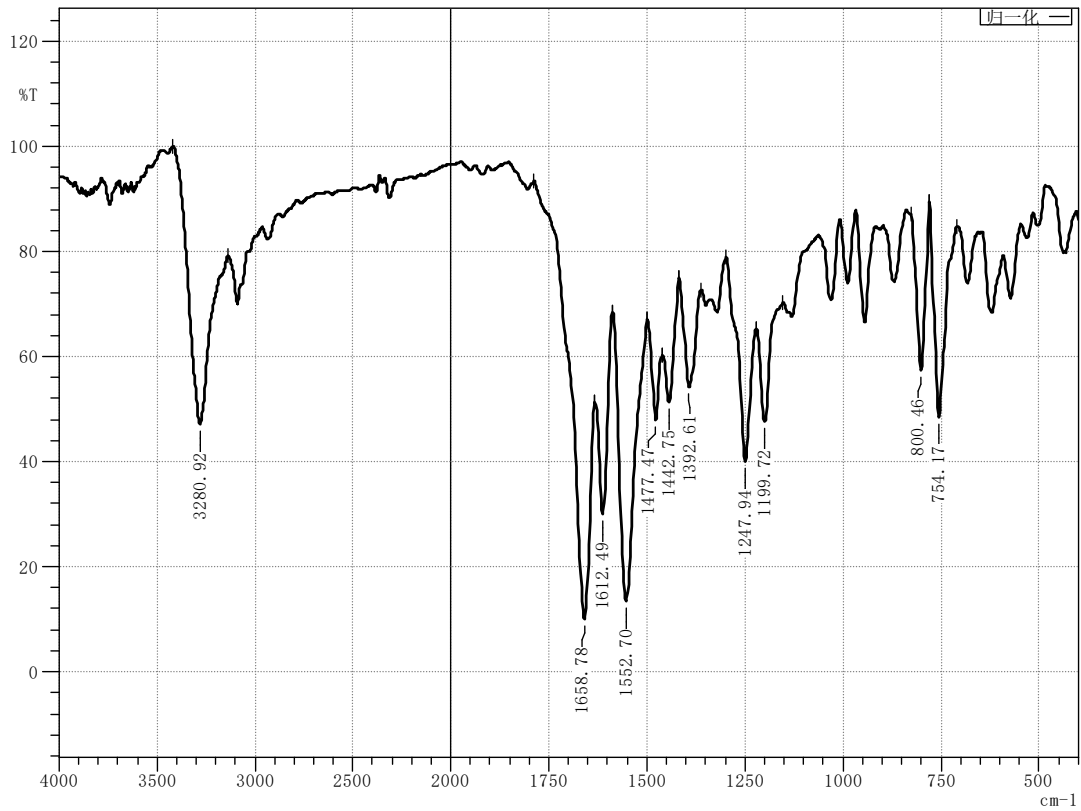

Figure 75 Infrared spectrum of compound M25

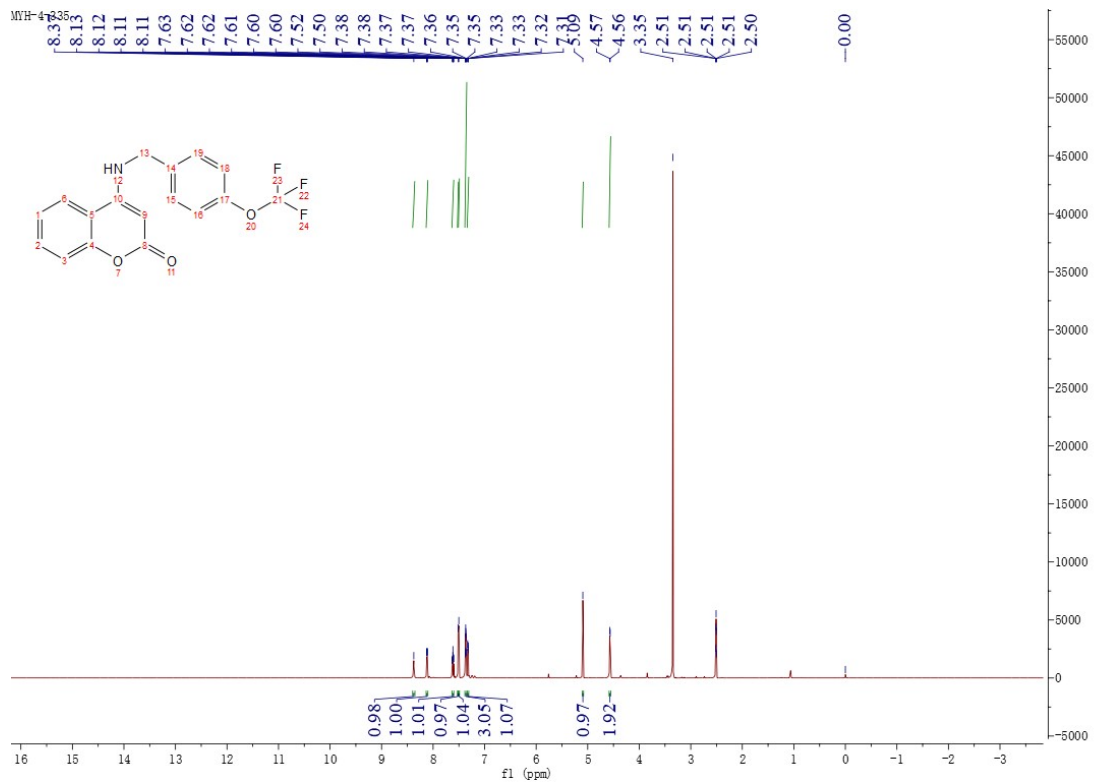

Figure 76 <sup>1</sup>H NMR Spectrum of Compound M26

MH-4-335

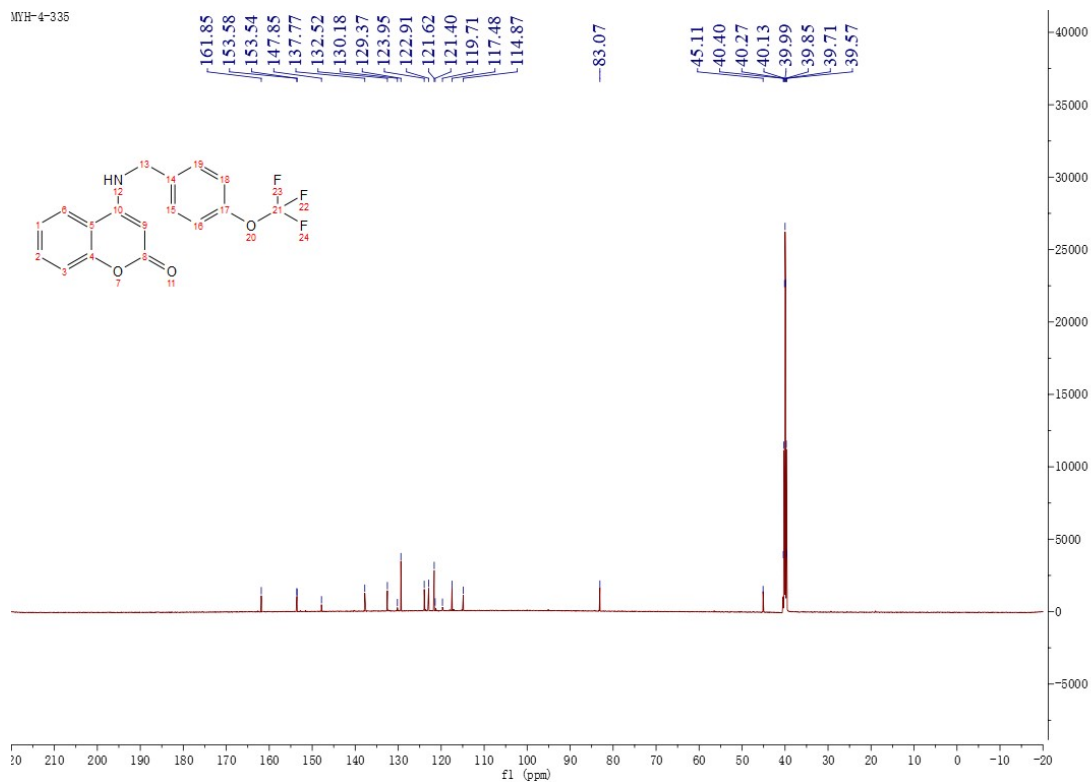

Figure 77 <sup>13</sup>CNMR Spectrum of Compound M26

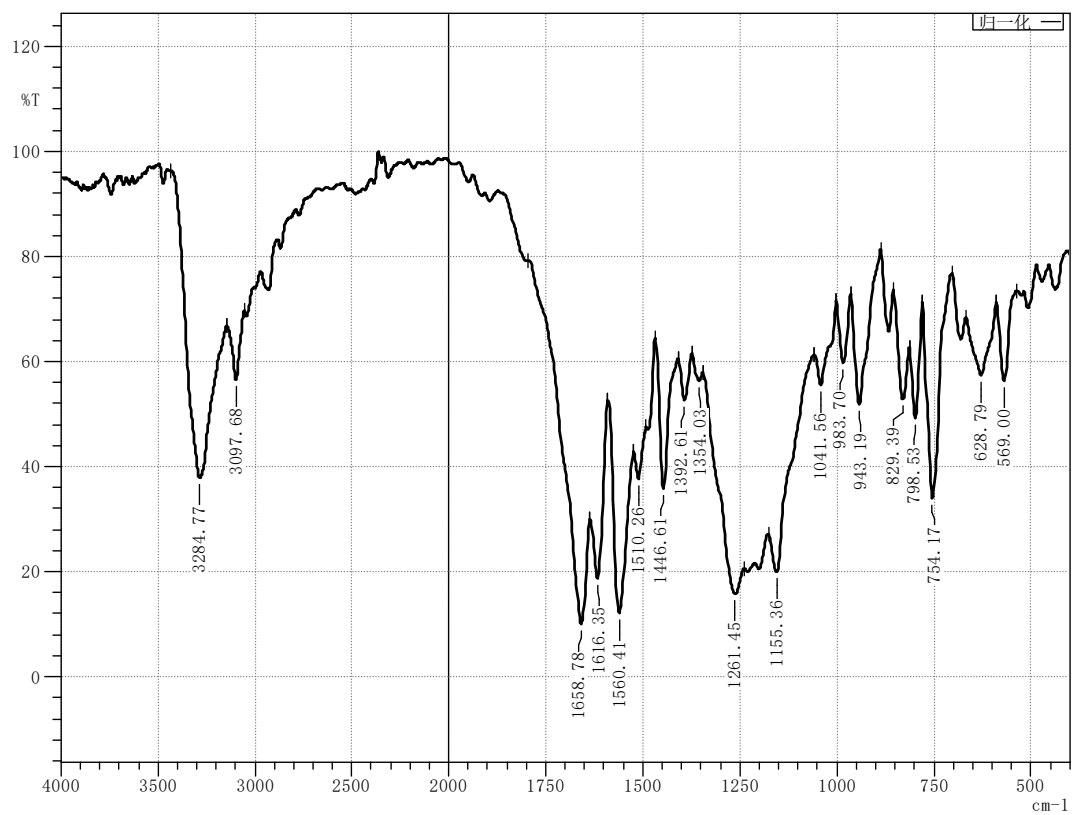

Figure 78 Infrared spectrum of compound M26

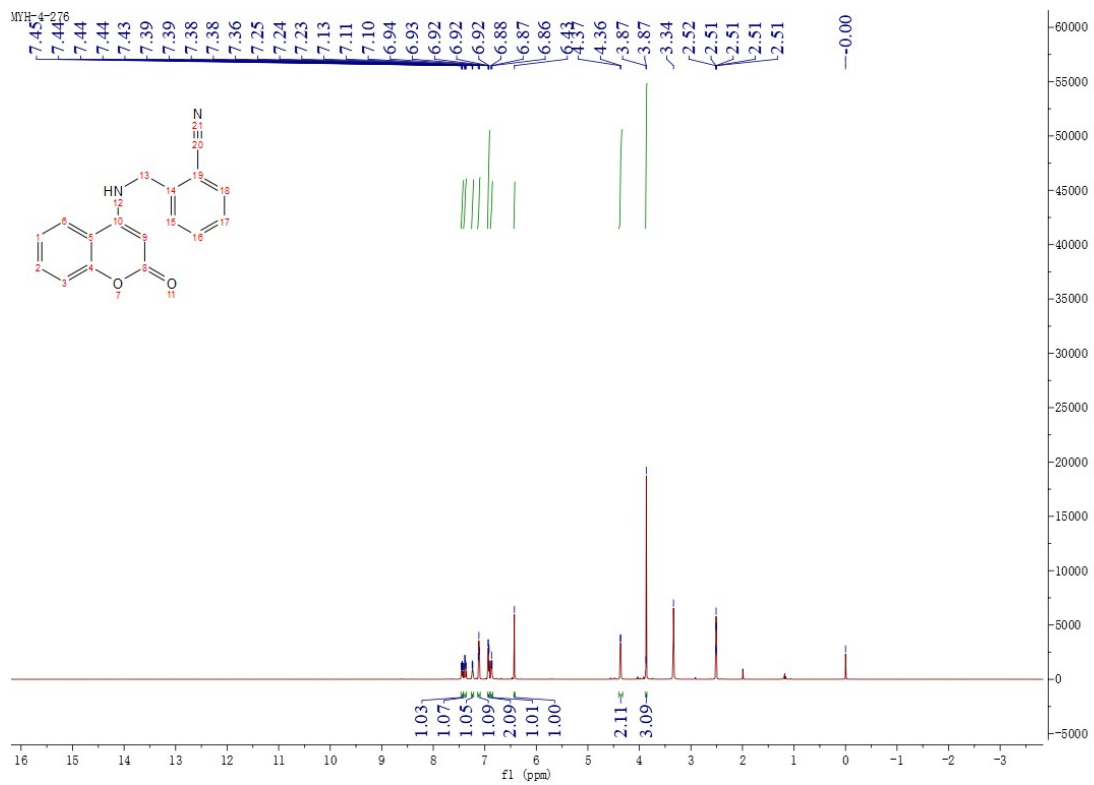

Figure 79  $^1\text{H NMR}$  Spectrum of Compound M27

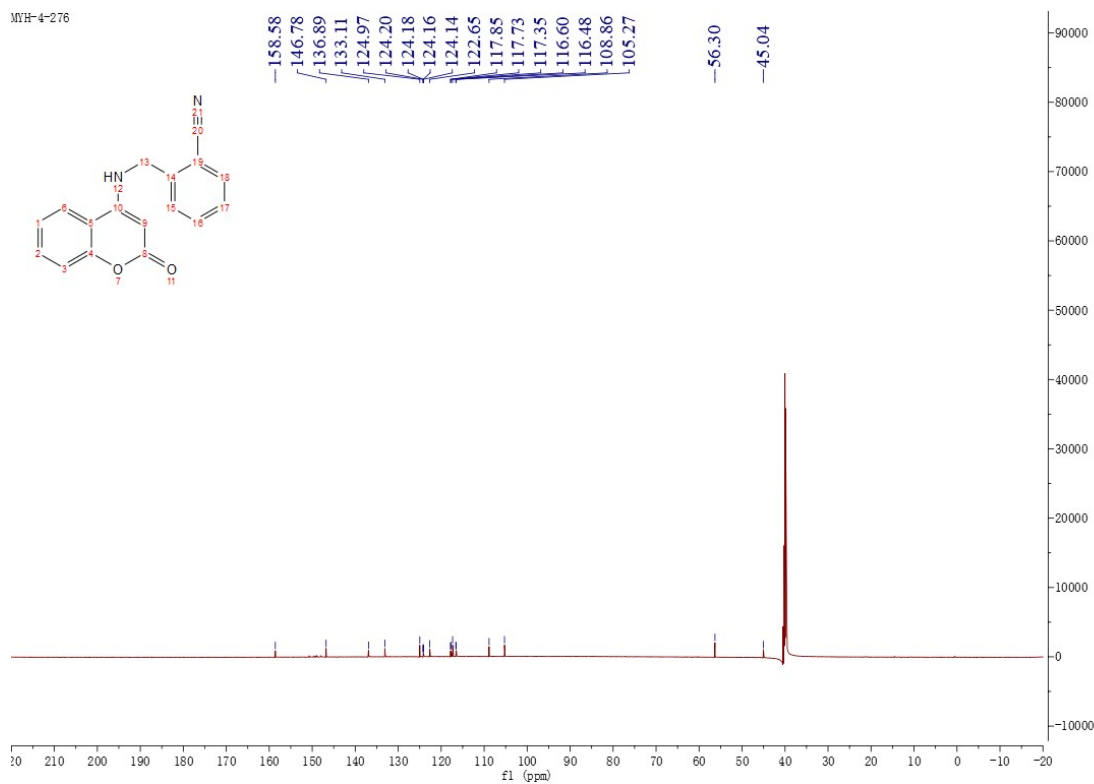

Figure 80  $^{13}\text{C NMR}$  Spectrum of Compound M27



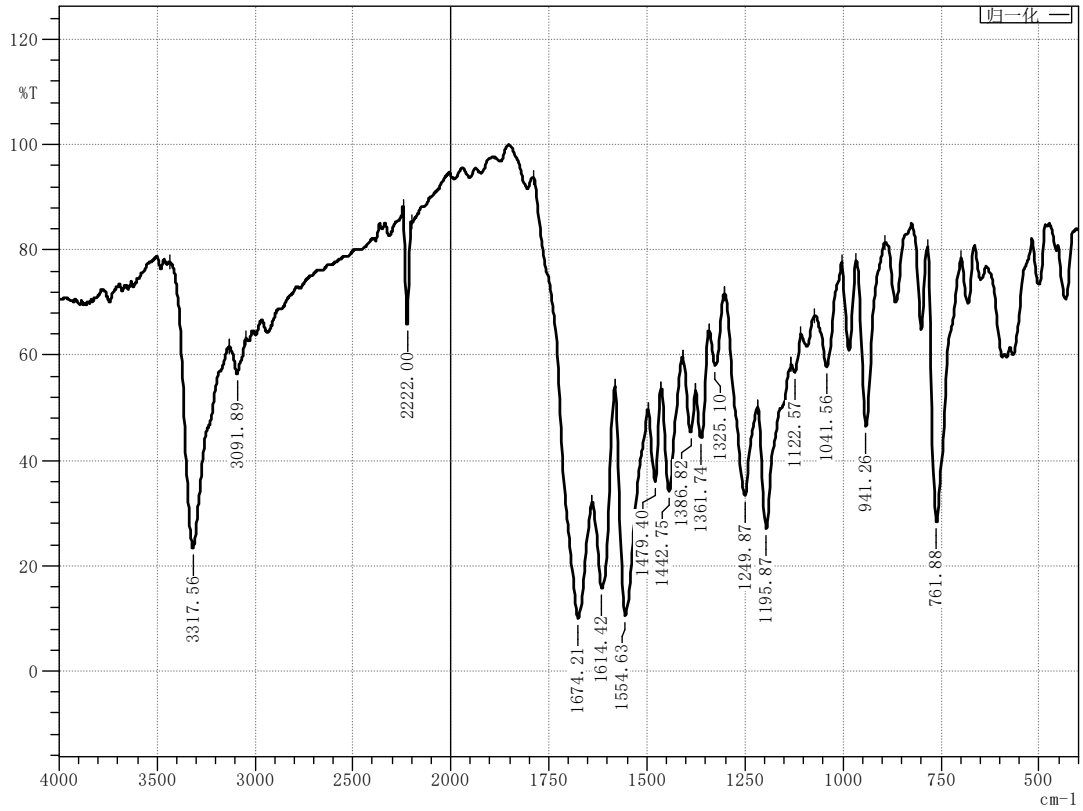

Figure 81 Infrared spectrum of compound M27

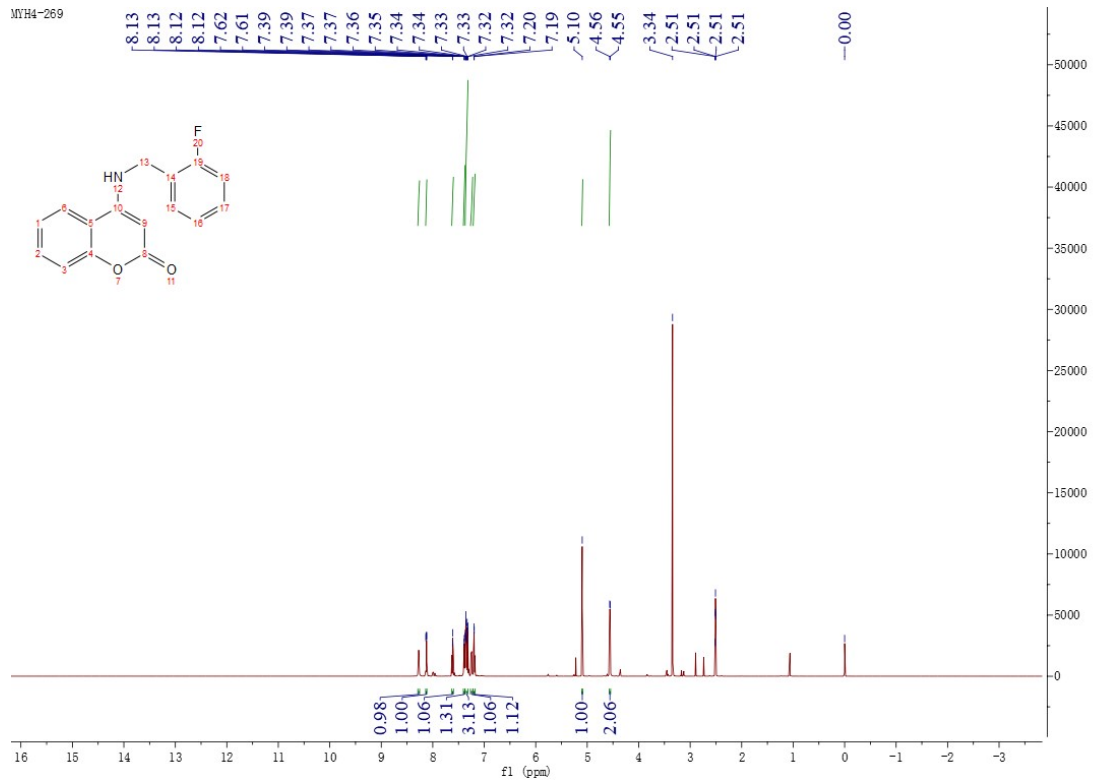

Figure 82 <sup>1</sup>H NMR Spectrum of Compound M28

M28-269

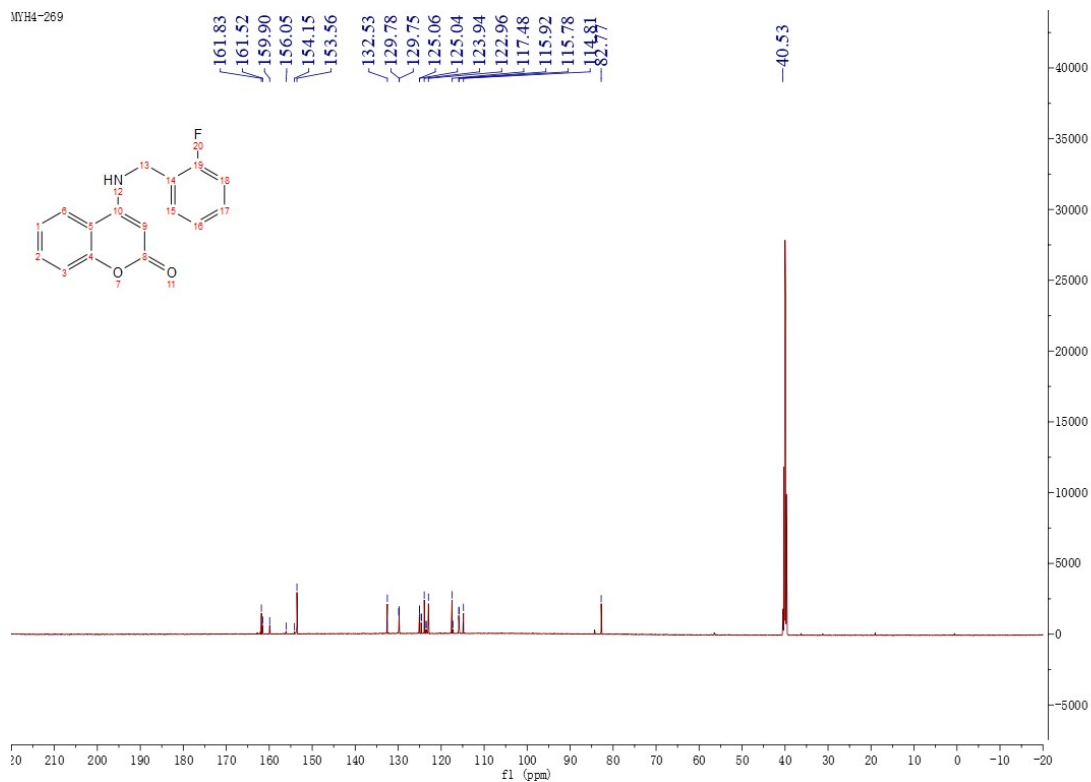

Figure 83 <sup>13</sup>C NMR Spectrum of Compound M28

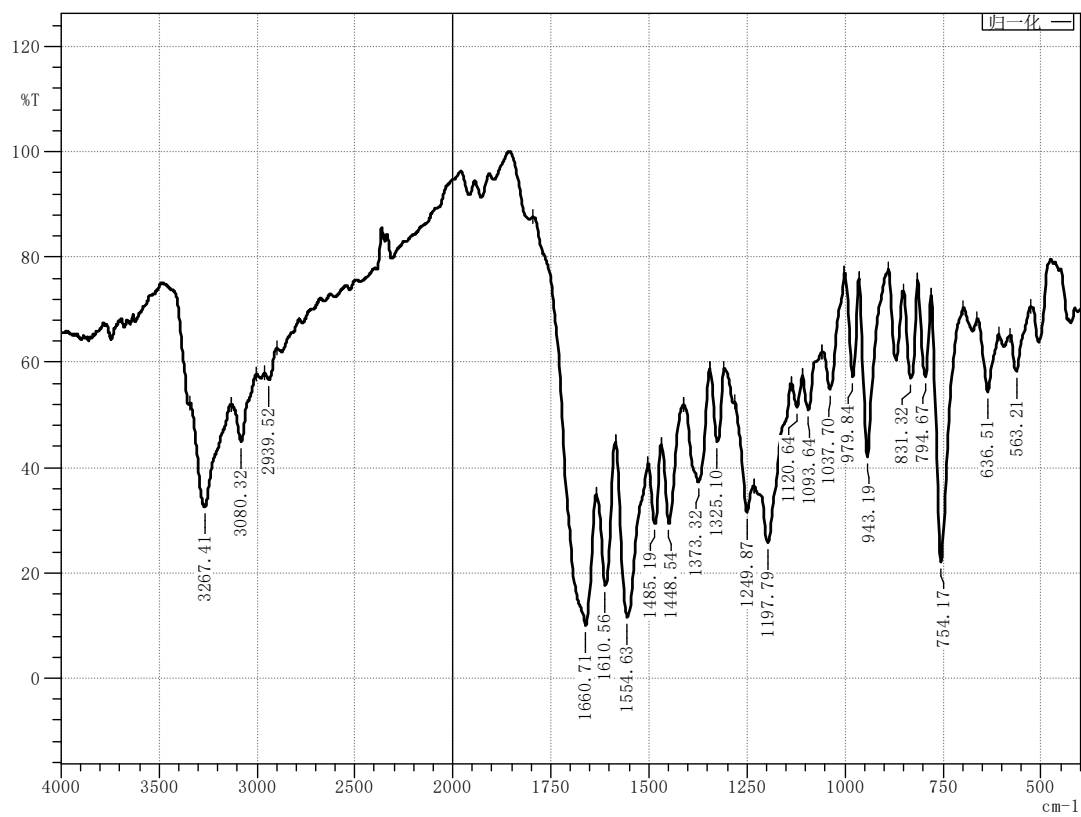

Figure 84 Infrared spectrum of compound M28

MTH-4-287

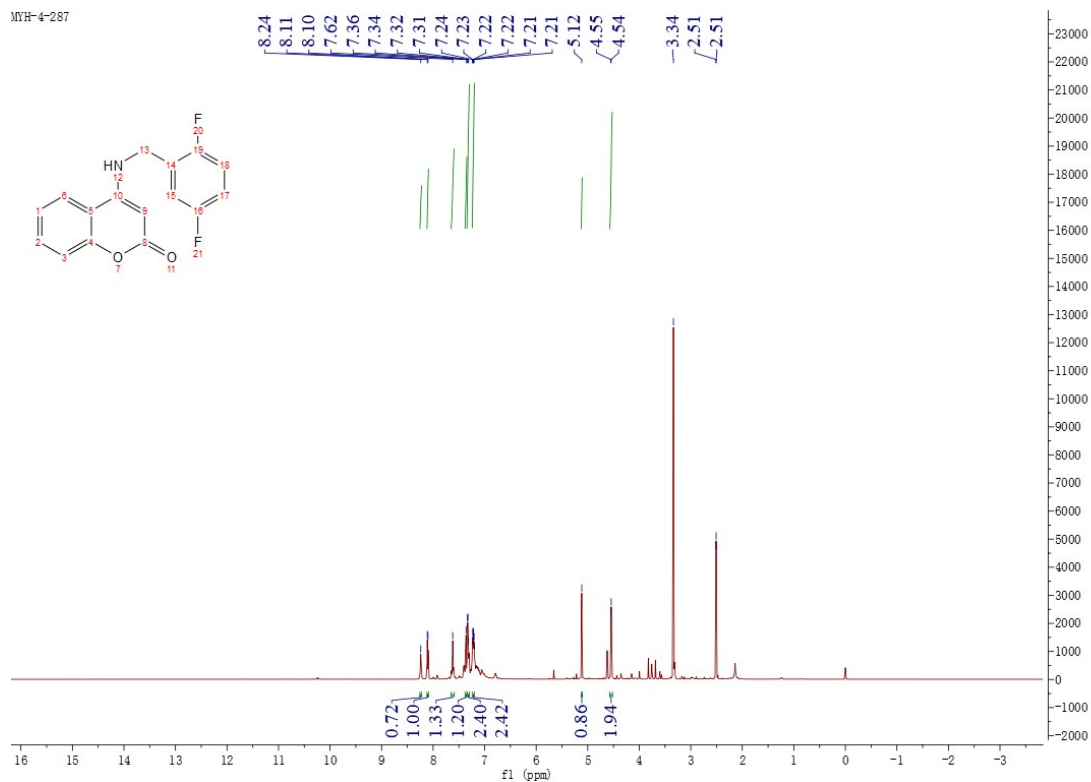

Figure 85 <sup>1</sup>H NMR Spectrum of Compound M29

MTH-4-287

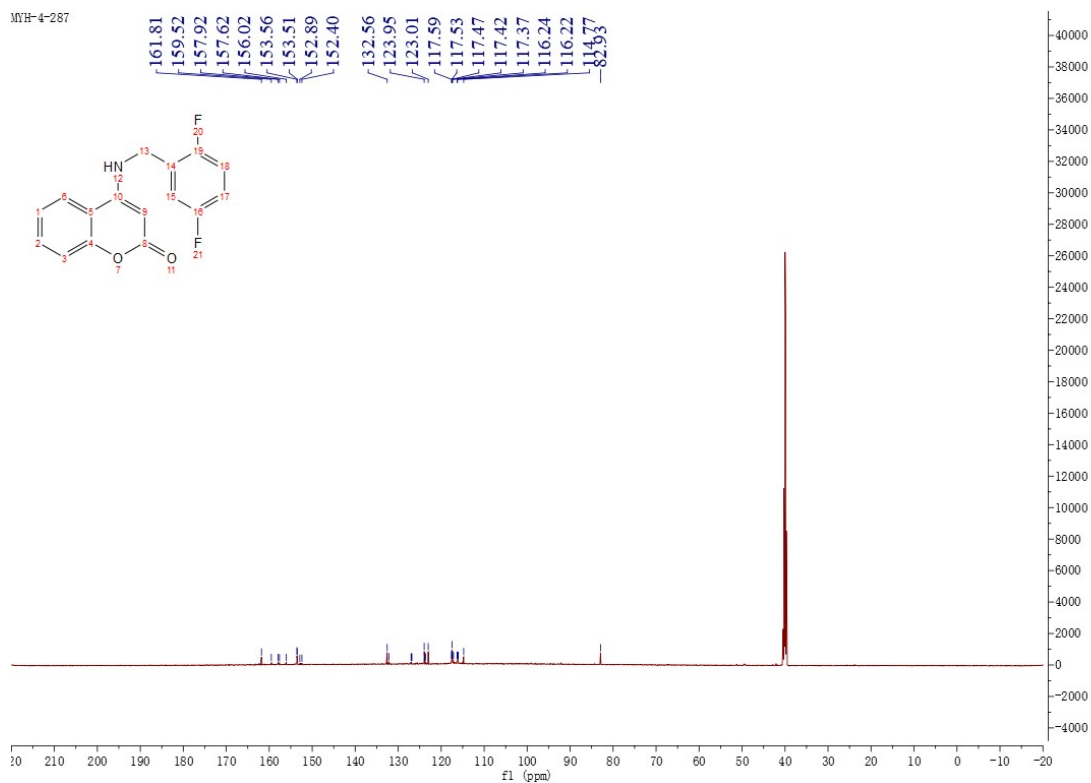

Figure 86 <sup>13</sup>C NMR Spectrum of Compound M29

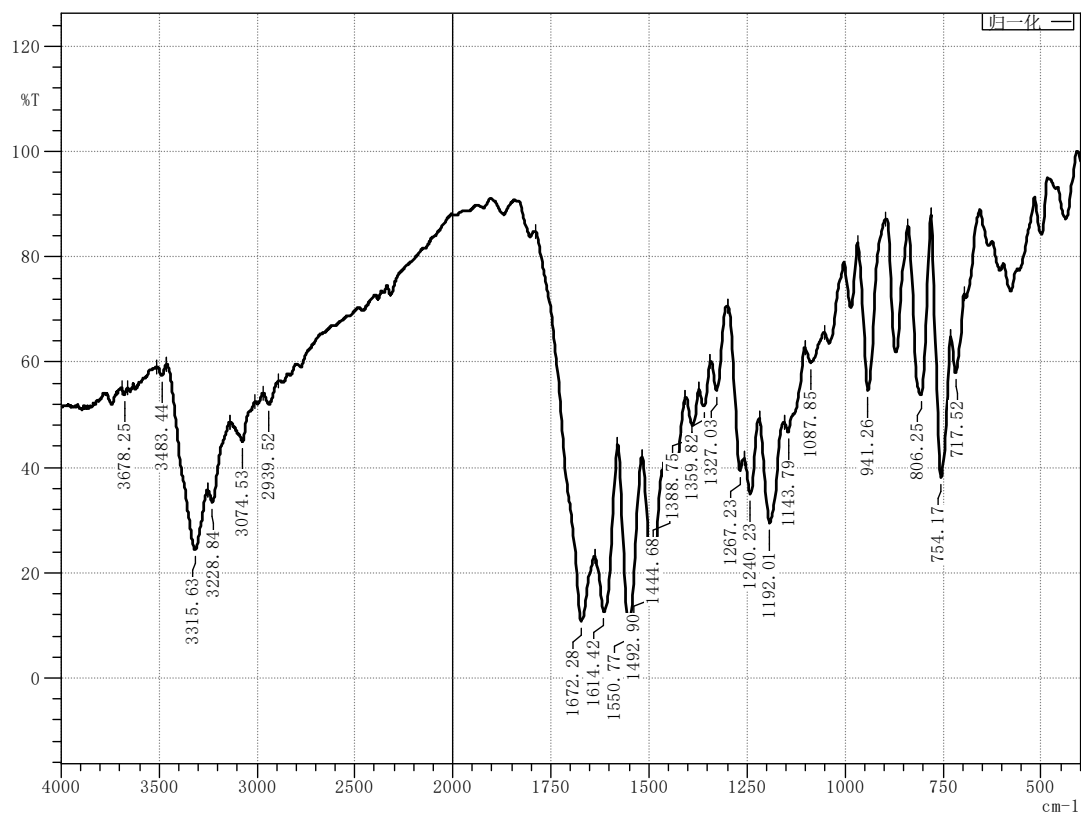

Figure 87 Infrared spectrum of compound M29
